# Supplementary material
Source: publisher figshare collection journal article supplement (https://springernature.figshare.com/ndownloader/files/13641227)
Supplement: Supplementary file 1 [file 13641227]

## Sheet: screening_sheet
Title/Abstract screen: Notes	Title/Abstract screen: Include/Exclude	Full-text screen: Notes	Full-text screen: Country	Full-text screen: Include/Exclude	Changes to Include/Exclude:	Reason for changes	Main reason for exclusion	Included in global mapping analysis	Included in transmission chain analysis	Included in treatment failure analysis	Reviewer initials	Data seeking log	Data seeking response	Conclusion	Source	GHDx NID	PMID or unique identifier	Digital Object ID	Article Title	Abstract	Language	Journal: Title	Journal: Abbreviation	Journal: NLM ID	Journal: Year	Journal: Month	Journal: Medline Date	Journal: Volume	Journal: Issue	Journal: Medline Pagination	Citation Medium	First Author (First Last)	All Authors (Last, Initials)	Affiliation	Article Type
	1		Congo	1				1	0	0	KEW				PubMed	329697	28221129	10.3201/eid2303.160679	New Mycobacterium tuberculosis Complex Sublineage, Brazzaville, Congo	Tuberculosis is a leading cause of illness and death in Congo. No data are available about the population structure and transmission dynamics of the Mycobacterium tuberculosis complex strains prevalent in this central Africa country. On the basis of single-nucleotide polymorphisms detected by whole-genome sequencing, we phylogenetically characterized 74 MTBC isolates from Brazzaville, the capital…	eng	Emerging infectious diseases	Emerg Infect Dis	9508155	2017	Mar		23	3	423-429	Internet	Sven Malm	Malm, S; Linguissi, LS; Tekwu, EM; Vouvoungui, JC; Kohl, TA; Beckert, P; Sidibe, A; Rüsch-Gerdes, S; Madzou-Laboum, IK; Kwedi, S; Penlap Beng, V; Frank, M; Ntoumi, F; Niemann, S		journal
	1		Brussels	1				1	1	0	KEW				PubMed	329320	28222189	10.1371/journal.pone.0172554	Molecular epidemiology of Mycobacterium tuberculosis complex in Brussels, 2010-2013	The tuberculosis (TB) incidence rate in Brussels-Capital Region is 3-fold higher than in Belgium as a whole. Eight years after the realization of initial prospective population-based molecular epidemiology investigations in this Region, a similar study over the period 2010-2013 was conducted. TB strains isolated from 945 patients were submitted to genotyping by standardized 24-locus-MIRU-VNTR typ…	eng	PloS one	PLoS One	101285081	2017			12	2	e0172554	Internet	Christelle Vluggen	Vluggen, C; Soetaert, K; Groenen, G; Wanlin, M; Spitaels, M; Arrazola de Oñate, W; Fauville-Dufaux, M; Saegerman, C; Mathys, V	Bacterial Diseases Service, Operational Direction Communicable and Infectious Diseases, Scientific Institute of Public Health (WIV-ISP), Brussels, Belgium.	journal
	1		Angola	1				1	1	0	KEW				PubMed	328743	28230095	10.1038/srep42814	Genetic diversity, transmission dynamics and drug resistance of Mycobacterium tuberculosis in Angola	Tuberculosis (TB) poses a serious public health problem in Angola. No surveillance data on drug resistance is available and nothing is known regarding the genetic diversity and population structure of circulating Mycobacterium tuberculosis strains. Here, we have genotyped and evaluated drug susceptibility of 89 Mycobacterium tuberculosis clinical isolates from Luanda. Thirty-three different spoli…	eng	Scientific reports	Sci Rep	101563288	2017	Feb		7		42814	Internet	João Perdigão	Perdigão, J; Clemente, S; Ramos, J; Masakidi, P; Machado, D; Silva, C; Couto, I; Viveiros, M; Taveira, N; Portugal, I	iMed.ULisboa - Instituto de Investigação do Medicamento, Faculdade de Farmácia, Universidade de Lisboa, Lisboa, Portugal.	journal
	1		Ethiopia	1				1	0	0	KEW				PubMed	329531	28249607	10.1186/s12879-017-2267-2	Molecular typing of Mycobacterium tuberculosis complex isolated from pulmonary tuberculosis patients in central Ethiopia	Identification of the types of strains of Mycobacterium tuberculosis (M. tuberculosis) complex causing tuberculosis (TB) could contribute to TB control program of specific geographic region as well as it could add knowledge onto the existing literature on TB worldwide. The objective of the present study was to identify the species and strains of M. tuberculosis complex causing pulmonary tuberculo…	eng	BMC infectious diseases	BMC Infect Dis	100968551	2017	Mar		17	1	184	Internet	Zufan Bedewi	Bedewi, Z; Worku, A; Mekonnen, Y; Yimer, G; Medhin, G; Mamo, G; Pieper, R; Ameni, G	Aklilu Lemma Institute of Pathobiology, Addis Ababa University, P.O. Box 1176, Addis Ababa, Ethiopia.	journal
	1		China	1				1	1	0	KEW				PubMed	328545	28333978	10.1371/journal.pone.0174197	Association between genotype and drug resistance profiles of Mycobacterium tuberculosis strains circulating in China in a national drug resistance survey	We describe the population structure of a representative collection of 3,133 Mycobacterium tuberculosis isolates, collected within the framework of a national resistance survey from 2007 in China. Genotyping data indicate that the epidemic strains in China can be divided into seven major complexes, of which 92% belonged to the East Asian (mainly Beijing strains) or the Euro-American lineage. The …	eng	PloS one	PLoS One	101285081	2017			12	3	e0174197	Internet	Yang Zhou	Zhou, Y; van den Hof, S; Wang, S; Pang, Y; Zhao, B; Xia, H; Anthony, R; Ou, X; Li, Q; Zheng, Y; Song, Y; Zhao, Y; van Soolingen, D	Chinese Centre for Disease Control and Prevention, Changping district, Beijing, China, P.R.	journal
hospital	1		India	1				1	0	0	LPW				PubMed	329857	28374900	10.1111/tmi.12875	Spoligotyping of Mycobacterium tuberculosis isolates at a tertiary care hospital in India	Spoligotyping is a valuable genotyping tool to study the genetic diversity and molecular epidemiology of Mycobacterium tuberculosis (M. tb). The aim of this study was to analyse different spoligotype patterns of M. tb strains isolated from patients with tuberculosis from different parts of India.A total of 163 M. tb isolates were spoligotyped between January 2014 and January 2015. About 47% (n = …	eng	Tropical medicine & international health : TM & IH	Trop Med Int Health	9610576	2017	Jun		22	6	703-707	Internet	Shirly Suzana	Suzana, S; Shanmugam, S; Uma Devi, KR; Swarna Latha, PN; Michael, JS	Department of Clinical Microbiology, Christian Medical College, Vellore, India.	journal
	1	Resist	Gabon	0	1	Received extractable strain data from author		1	0	0	KEW	requested data associated with this study 11/3/17	Received data	Include	PubMed	332124	28446574	10.1128/JCM.02257-16	The use of GeneXpert remnants for drug resistance profiling and molecular epidemiology of tuberculosis in Libreville, Gabon	Multidrug (MDR) and extensively drug resistant (XDR) Mycobacterium tuberculosis are major problems in global health. The GeneXpertMTB/RIF (Xpert) rapidly detects resistance to rifampicin (RIF-R), but detection of the additional resistance that defines MDR and XDR-TB, and for molecular epidemiology, specimen cultures and biosafe infrastructure are generally required. We sought to determine whether…	eng	Journal of clinical microbiology	J Clin Microbiol	7505564	2017	Apr					Internet	Amel Kévin Alame-Emane	Alame-Emane, AK; Pierre-Audigier, C; Aboumegone-Biyogo, OC; Nzoghe-Mveang, A; Cadet-Daniel, V; Sola, C; Djoba-Siawaya, JF; Gicquel, B; Takiff, HE	Unité de Génétique Mycobacterienne, Institut Pasteur, Paris, 75015, France.	journal
	1	foreign non-foreign data available for total year data	Japan	1				1	0	0	KEW				PubMed	328716	28545488	10.1186/s12879-017-2457-y	Genetic diversity of Mycobacterium tuberculosis isolates from Tochigi prefecture, a local region of Japan	Foreign-born patients with tuberculosis (TB) may introduce globally disseminated isolates of Mycobacterium tuberculosis into large cities in Japan. The risk of dissemination of these isolates into local regions, however, has not been determined. This study analyzed the molecular epidemiology of M. tuberculosis isolates obtained from TB patients living in a local region of Japan.Whole genome seque…	eng	BMC infectious diseases	BMC Infect Dis	100968551	2017	May		17	1	365	Internet	Fuminori Mizukoshi	Mizukoshi, F; Miyoshi-Akiyama, T; Iwai, H; Suzuki, T; Kiritani, R; Kirikae, T; Funatogawa, K	Tochigi Prefectural Institute of Public Health and Environmental Science, Utsunomiya, Tochigi, Japan.	journal
	1		Madagascar	1				1	0	0	KEW				PubMed	336187	28806916	10.1186/s12879-017-2653-9	Tuberculosis (TB) remains a public health problem in Madagascar. A crucial element of TB control is the development of an easy and rapid method for the orientation of TB control strategies in the country. Our main objective was to develop a TB spatial hotspot identification method by combining spatial analysis and TB genotyping method in Antananarivo.	Assessment of tuberculosis spatial hotspot areas in Antananarivo, Madagascar, by combining spatial analysis and genotyping.	eng	BMC infectious diseases	BMC Infect Dis	100968551	2017	Aug		17	1	562	Internet	Ratovonirina	Noël Harijaona	Rakotosamimanana
	1		Canada	1				1	0	0	KEW				PubMed	336186	28982116	10.1371/journal.pone.0185656	Canada has one of the lowest rates of tuberculosis (TB) in the world, however, among certain sub-populations, disease incidence rates approach those observed in sub-Saharan Africa, and other high incidence regions. In this study, we applied mycobacterial interspersed repetitive unit (MIRU) variable number of tandem repeat (VNTR) and whole genome sequencing (WGS) to the analysis of Mycobacterium t…	Application of whole genome sequence analysis to the study of Mycobacterium tuberculosis in Nunavut, Canada.	eng	PloS one	PLoS One	101285081	2017			12	10	e0185656	Internet	Tyler	Andrea D	Randell
	1		USA	1				1	0	0	KEW				PubMed	336188	28993293	10.1016/j.meegid.2017.10.004	Mycobacterium tuberculosis is characterized into four global lineages with strong geographical restriction. To date one study in the United States has investigated M. tuberculosis lineage association with tuberculosis (TB) disease presentation (extra-pulmonary versus pulmonary). We update this analysis using recent (2009-2015) data from the State of Florida to measure lineage association with pul…	Association between Mycobacterium tuberculosis lineage and site of disease in Florida, 2009-2015.	eng	Infection, genetics and evolution : journal of molecular epidemiology and evolutionary genetics in infectious diseases	Infect Genet Evol	101084138	2017	Oct		55		366-371	Internet	Séraphin	Marie Nancy	Doggett
	1		Canada	1				1	0	0	KEW				PubMed	336190	29069284	10.1093/cid/cix906	Understanding regional molecular epidemiology allows for the development of more efficient tuberculosis (TB) prevention strategies in low-incidence settings.	Molecular Epidemiology of Tuberculosis in British Columbia, Canada - A 10-Year Retrospective Study.	eng	Clinical infectious diseases : an official publication of the Infectious Diseases Society of America	Clin Infect Dis	9203213	2017	Oct					Internet	Guthrie	Jennifer L	Kong
	1		Brazil	1				1	0	0	KEW				PubMed	336189	29081357	10.1016/j.meegid.2017.10.021	There is only scarce information available on genotypic diversity of the Mycobacterium tuberculosis complex (MTBC) clinical isolates circulating in the Northern part of Brazil, a relatively neglected region regarding research on tuberculosis. We therefore characterized 980 MTBC clinical isolates from the state of Pará, by spoligotyping and data was compared with patterns from around the world, be…	Genetic diversity of Mycobacterium tuberculosis from Pará, Brazil, reveals a higher frequency of ancestral strains than previously reported in South America.	eng	Infection, genetics and evolution : journal of molecular epidemiology and evolutionary genetics in infectious diseases	Infect Genet Evol	101084138	2017	Oct		56		62-74	Internet	Conceição	Emilyn Costa	Rastogi
	1		Australia	1				1	0	0	LPW				PubMed	328825	26187743	10.1016/j.meegid.2015.07.014	Genotype heterogeneity of Mycobacterium tuberculosis within geospatial hotspots suggests foci of imported infection in Sydney, Australia	In recent years the State of New South Wales (NSW), Australia, has maintained a low tuberculosis incidence rate with little evidence of local transmission. Nearly 90% of notified tuberculosis cases occurred in people born in tuberculosis-endemic countries. We analyzed geographic, epidemiological and genotypic data of all culture-confirmed tuberculosis cases to identify the bacterial and demograph…	eng	Infection, genetics and evolution : journal of molecular epidemiology and evolutionary genetics in infectious diseases	Infect Genet Evol	101084138	2016	Jun		40		346-51	Internet	Ulziijargal Gurjav	Gurjav, U; Jelfs, P; Hill-Cawthorne, GA; Marais, BJ; Sintchenko, V	Sydney Medical School and the Marie Bashir Institute for Infectious Diseases and Biosecurity, The University of Sydney, Sydney, Australia; Centre for Infectious Diseases and Microbiology - Public Health, Westmead Hospital, Sydney, Australia.	journal
	1		Egypt	1				1	0	0	LPW				PubMed	328669	26786649	10.1016/j.tube.2015.11.002	First insight into the genetic population structure of Mycobacterium tuberculosis isolated from pulmonary tuberculosis patients in Egypt	The present study aimed to assess the population structure of Mycobacterium tuberculosis (MTB) isolates from Egypt. A total of 230 MTB isolates were analysed using spoligotyping, large sequence polymorphism (LSPs), mycobacterial interspersed repetitive unit-variable number tandem repeat (MIRU-VNTR) typing and multi-locus sequence typing (MLST). The majority of isolates (93.0%) belonged to lineage…	eng	Tuberculosis (Edinburgh, Scotland)	Tuberculosis (Edinb)	100971555	2016	Jan		96		13-20	Internet	Hassan Mahmoud Diab	Diab, HM; Nakajima, C; Kotb, SA; Mokhtar, A; Khder, NF; Abdelaal, AS; Hegazy, A; Poudel, A; Shah, Y; Suzuki, Y	Department of Animal Hygiene, Faculty of Veterinary Medicine, South Valley University, Qena, Egypt; Division of Bioresources, Hokkaido University Research Center for Zoonosis Control, Sapporo, Japan.	journal
	1	Multiple Orphan categories in different lineages	Indonesia	1				1	0	0	LPW				PubMed	329700	26825253	10.1016/j.meegid.2016.01.019	Predominance of modern Mycobacterium tuberculosis strains and active transmission of Beijing sublineage in Jayapura, Indonesia Papua	Mycobacterium tuberculosis genotype distribution is different between West and Central Indonesia, but there are no data on the most Eastern part, Papua. We aimed to identify the predominant genotypes of M. tuberculosis responsible for tuberculosis in coastal Papua, their transmission, and the association with patient characteristics. A total of 199 M. tuberculosis isolates were collected. Spoligo…	eng	Infection, genetics and evolution : journal of molecular epidemiology and evolutionary genetics in infectious diseases	Infect Genet Evol	101084138	2016	Apr		39		187-93	Internet	Lidya Chaidir	Chaidir, L; Sengstake, S; de Beer, J; Oktavian, A; Krismawati, H; Muhapril, E; Kusumadewi, I; Annisa, J; Anthony, R; van Soolingen, D; Achmad, TH; Marzuki, S; Alisjahbana, B; van Crevel, R	Faculty of Medicine, Universitas Padjadjaran, Eijkman 38 Bandung, Indonesia. Electronic address: lidya.chaidir@gmail.com.	journal
	1		Nigeria	1				1	1	0	LPW				PubMed	328706	26927993	10.1016/j.ijmyco.2015.06.008	Genetic diversity of Mycobacterium tuberculosis complex strains isolated from patients with pulmonary tuberculosis in Anambra State, Nigeria	In this study, we analyzed Mycobacterium tuberculosis complex (MTC) genetic diversity in Anambra State, Nigeria based on spoligotyping followed by 5-loci exact tandem repeats (ETRs). Spoligotyping of 180 MTC strains isolated in 2009-2011 from pulmonary tuberculosis (TB) patients led to a total of 31 distinct patterns. A comparison with the SITVIT2 international database showed that all the 31 pat…	eng	International journal of mycobacteriology	Int J Mycobacteriol	101615660	2016	Mar		5	1	74-9	Internet	Gertrude N Uzoewulu	Uzoewulu, GN; Lawson, L; Nnanna, IS; Rastogi, N; Goyal, M	Nnamdi Azikiwe University Teaching Hospital, Nnewi, Anambra State, Nigeria.	journal
	1		China	1				1	0	0	LPW				PubMed	328581	26980491	10.1016/j.tube.2015.11.007	Comparison of the socio-demographic and clinical features of pulmonary TB patients infected with sub-lineages within the W-Beijing and non-Beijing Mycobacterium tuberculosis	Highly lethal outbreaks of multidrug-resistant (MDR) and extensively drug-resistant (XDR) tuberculosis are increasing. Mycobacterium tuberculosis variant Beijing family and its members is regarded as a successful clone of M. tuberculosis that is associated with drug resistance in China. Understanding the genetic characteristics and molecular mechanism of drug resistant tuberculosis within Beijing…	eng	Tuberculosis (Edinburgh, Scotland)	Tuberculosis (Edinb)	100971555	2016	Mar		97		18-25	Internet	Yi Hu	Hu, Y; Mathema, B; Zhao, Q; Zheng, X; Li, D; Jiang, W; Wang, W; Xu, B	Department of Epidemiology, School of Public Health, Fudan University, Shanghai, China; Key Laboratory of Public Health Safety (Fudan University), Ministry of Education, China. Electronic address: yhu@fudan.edu.cn.	journal
	1	also contains data for sao paulo, rio de janeiro, and brazil that seem to previously have been published	Brazil	1				1	0	0	KEW				PubMed	328673	26980497	10.1016/j.tube.2015.12.005	First insight into the molecular epidemiology of Mycobacterium tuberculosis in Santa Catarina, southern Brazil	Molecular epidemiology of Mycobacterium tuberculosis is useful for understanding disease transmission dynamics, and to establish strategic measures for TB control and prevention. The aim of this study was to analyze clinical, epidemiological and molecular characteristics of MTBC clinical isolates from Santa Catarina state, southern Brazil. During one-year period, 406 clinical isolates of MTBC wer…	eng	Tuberculosis (Edinburgh, Scotland)	Tuberculosis (Edinb)	100971555	2016	Mar		97		57-64	Internet	Christiane Lourenço Nogueira	Nogueira, CL; Prim, RI; Senna, SG; Rovaris, DB; Maurici, R; Rossetti, ML; Couvin, D; Rastogi, N; Bazzo, ML	Universidade Federal de Santa Catarina - UFSC, Campus Universitário, s/n. Florianópolis, Santa Catarina, Brazil. Electronic address: nogueira.chris@gmail.com.	journal
	1		France	1				1	0	0	KEW				PubMed	328578	27128522	10.1371/journal.pone.0153580	Combined Genotypic, Phylogenetic, and Epidemiologic Analyses of Mycobacterium tuberculosis Genetic Diversity in the Rhône Alpes Region, France	The present work relates to identification and a deep molecular characterization of circulating Mycobacterium tuberculosis complex (MTBC) strains in the Rhône-Alpes region, France from 2000 to 2010. It aimed to provide with a first snapshot of MTBC genetic diversity in conjunction with bacterial drug resistance, type of disease and available demographic and epidemiologic characteristics over an e…	eng	PloS one	PLoS One	101285081	2016			11	4	e0153580	Internet	Catherine Pichat	Pichat, C; Couvin, D; Carret, G; Frédénucci, I; Jacomo, V; Carricajo, A; Boisset, S; Dumitrescu, O; Flandrois, JP; Lina, G; Rastogi, N	Laboratoire de bactériologie, Centre hospitalier Lyon-Sud, Pierre-Bénite, France.	journal
	1		Tanzania	1				1	1	0	KEW				PubMed	329272	27149626	10.1371/journal.pone.0154571	Mapping of Mycobacterium tuberculosis Complex Genetic Diversity Profiles in Tanzania and Other African Countries	The aim of this study was to assess and characterize Mycobacterium tuberculosis complex (MTBC) genotypic diversity in Tanzania, as well as in neighbouring East and other several African countries. We used spoligotyping to identify a total of 293 M. tuberculosis clinical isolates (one isolate per patient) collected in the Bunda, Dar es Salaam, Ngorongoro and Serengeti areas in Tanzania. The result…	eng	PloS one	PLoS One	101285081	2016			11	5	e0154571	Internet	Erasto V Mbugi	Mbugi, EV; Katale, BZ; Streicher, EM; Keyyu, JD; Kendall, SL; Dockrell, HM; Michel, AL; Rweyemamu, MM; Warren, RM; Matee, MI; van Helden, PD; Couvin, D; Rastogi, N	Department of Biochemistry, Muhimbili University of Health and Allied Sciences, P. O. Box 65001, Dar es Salaam, Tanzania.	journal
hospital	1		India	1				1	0	0	LPW				PubMed	328599	27155185	10.5588/ijtld.15.0621	Distribution and association of Mycobacterium tuberculosis CAS lineage with multidrug resistance in North India	A tertiary care hospital in North India.To determine the prevalence of different genotypes and examine their association with drug resistance among clinical isolates of Mycobacterium tuberculosis from the northern region of India.We analysed 100 clinical isolates of M. tuberculosis using mycobacterial interspersed repetitive units genotyping and TbD1 analysis.The analysis revealed that 34% of str…	eng	The international journal of tuberculosis and lung disease : the official journal of the International Union against Tuberculosis and Lung Disease	Int J Tuberc Lung Dis	9706389	2016	Jun		20	6	806-11	Internet	S K Dhatwalia	Dhatwalia, SK; Yadav, R; Behera, D; Rudramurthy, SM; Kaur, H; Sethi, S	Department of Medical Microbiology, Postgraduate Institute of Medical Education and Research, Chandigarh, India.	journal
	1	spoligotypes available in binary but unextractable	Tanzania	1				1	0	0	LPW				PubMed	329280	27156627	10.1016/j.tube.2016.02.002	Molecular characterization of Mycobacterium tuberculosis isolates from Tanga, Tanzania: First insight of MIRU-VNTR and microarray-based spoligotyping in a high burden country	Molecular typing of Mycobacterium tuberculosis(MTB) has greatly enhanced the understanding of the population structure of MTB isolates and epidemiology of tuberculosis (TB). To characterize prevalent genotypes of MTB, microarrays?based spoligotyping and mycobacterial interspersed repetitive unit?variable number of tandem repeats (MIRU?VNTR) were applied on 80 isolates collected from primary healt…	eng	Tuberculosis (Edinburgh, Scotland)	Tuberculosis (Edinb)	100971555	2016	May		98		116-24	Internet	Abubakar S Hoza	Hoza, AS; Mfinanga, SG; Moser, I; König, B	Department of Medical Microbiology and Epidemiology of Infectious Diseases, Medical Faculty, University of Leipzig, Liebig Str. 21, 04103 Leipzig, Germany; Department of Veterinary Microbiology and Parasitology, Sokoine University of Agriculture, P.O. Box 3019, Morogoro, Tanzania. Electronic address: abshoza@gmail.com.	journal
	1		Spain	1				1	0	0	KEW				PubMed	328822	27315243	10.1371/journal.pone.0157266	Genomic Diversity of Mycobacterium tuberculosis Complex Strains in Cantabria (Spain), a Moderate TB Incidence Setting	Tuberculosis (TB) control strategies are focused mainly on prevention, early diagnosis, compliance to treatment and contact tracing. The objectives of this study were to explore the frequency and risk factors of recent transmission of clinical isolates of Mycobacterium tuberculosis complex (MTBC) in Cantabria in Northern Spain from 2012 through 2013 and to analyze their clonal complexity for bett…	eng	PloS one	PLoS One	101285081	2016			11	6	e0157266	Internet	Inmaculada C Pérez Del Molino Bernal	Pérez Del Molino Bernal, IC; Lillebaek, T; Pedersen, MK; Martinez-Martinez, L; Folkvardsen, DB; Agüero, J; Rasmussen, EM	Service of Microbiology, University Hospital Marqués de Valdecilla, Santander, Spain.	journal
	1		Mexico	1				1	0	0	LPW				PubMed	329328	27418234	10.1016/j.meegid.2016.07.001	Molecular epidemiology of Mycobacterium tuberculosis in Baja California, Mexico: A result of human migration?	The State of Baja California (BC) exhibits the highest incidence and prevalence rates of tuberculosis (TB), and multidrug-resistant TB (MDR-TB) in Mexico. However information about the circulation of M. tuberculosis lineages in BC and Mexico as a whole is limited. Here, we describe the genetic relationship and genetic diversity among M. tuberculosis clinical isolates (n=140) collected in BC betwe…	eng	Infection, genetics and evolution : journal of molecular epidemiology and evolutionary genetics in infectious diseases	Infect Genet Evol	101084138	2016	Jul					Internet	Carlos A Flores-López	Flores-López, CA; Zenteno-Cuevas, R; Laniado-Laborín, R; Reynaud, Y; García-Ortiz, RA; González-Y-Merchand, JA; Rivera, S; Vázquez-Chacón, CA; Vaughan, G; Martínez-Guarneros, JA; Victoria-Cota, NL; Cruz-Rivera, M; Rastogi, N; Muñiz-Salazar, R	Facultad de Ciencias, Universidad Autónoma de Baja California, Ensenada, Baja California, Mexico; Red Multidisciplinaria de Investigación en Tuberculosis, Mexico. Electronic address: http://www.remitb.org.	journal
	1		India	1				1	0	0	LPW				PubMed	329724	27496592	10.1016/j.jiph.2016.06.007	Prevalence of Mycobacterium tuberculosis Beijing genotype and its association with drug resistance in North India	The global presence and rapid dissemination of Beijing genotype of Mycobacterium tuberculosis, makes it an important issue of public health. Its presence and association with multi-drug resistance has been shown in many settings. In present study we tried to find its prevalence and association with drug resistance in North India. One hundred and twenty four M. tuberculosis isolates were analyzed …	eng	Journal of infection and public health	J Infect Public Health	101487384	2016	Aug					Internet	Jitendra Prasad Mathuria	Mathuria, JP; Srivastava, GN; Sharma, P; Mathuria, BL; Ojha, S; Katoch, VM; Anupurba, S	Department of Microbiology, Institute of Medical Sciences, Banaras Hindu University, Varanasi 221005, India; Department of Medical Lab technology, Paramedical Vigyaan Mahvidhalaya, Uttar Pradesh University of Medical Sciences, Saifai, India. Electronic address: jitesh141@gmail.com.	journal
	1		Ghana	1				1	1	0	KEW				PubMed	329297	27506391	10.1186/s12879-016-1725-6	Molecular epidemiology of Mycobacterium africanum in Ghana	Mycobacterium africanum comprises two phylogenetic lineages within the M. tuberculosis complex (MTBC) and is an important cause of human tuberculosis (TB) in West Africa. The reasons for this geographic restriction of M. africanum remain unclear. Here, we performed a prospective study to explore associations between the characteristics of TB patients and the MTBC lineages circulating in Ghana.We …	eng	BMC infectious diseases	BMC Infect Dis	100968551	2016	Aug		16		385	Internet	Adwoa Asante-Poku	Asante-Poku, A; Otchere, ID; Osei-Wusu, S; Sarpong, E; Baddoo, A; Forson, A; Laryea, C; Borrell, S; Bonsu, F; Hattendorf, J; Ahorlu, C; Koram, KA; Gagneux, S; Yeboah-Manu, D	Noguchi Memorial Institute for Medical Research, University of Ghana, Legon, Ghana.	journal
	1	Microdata available in supplement, could not extract	Chile	1				1	1	0	LPW				PubMed	328530	27518286	10.1371/journal.pone.0160434	Analysis of Mycobacterium tuberculosis Genotypic Lineage Distribution in Chile and Neighboring Countries	Tuberculosis (TB), caused by the pathogen Mycobacterium tuberculosis (MTB), remains a disease of high importance to global public health. Studies into the population structure of MTB have become vital to monitoring possible outbreaks and also to develop strategies regarding disease control. Although Chile has a low incidence of MTB, the current rates of migration have the potential to change this…	eng	PloS one	PLoS One	101285081	2016			11	8	e0160434	Internet	Jaime Lagos	Lagos, J; Couvin, D; Arata, L; Tognarelli, J; Aguayo, C; Leiva, T; Arias, F; Hormazabal, JC; Rastogi, N; Fernández, J	Subdepartment of Molecular Genetics, Public Health Institute of Chile, Santiago, Chile.	journal
	1		Ghana	1				1	0	0	KEW				PubMed	329852	27564240	10.1371/journal.pone.0161892	Spatio-Temporal Distribution of Mycobacterium tuberculosis Complex Strains in Ghana	There is a perception that genomic differences in the species/lineages of the nine species making the Mycobacterium tuberculosis complex (MTBC) may affect the efficacy of distinct control tools in certain geographical areas. We therefore analyzed the prevalence and spatial distribution of MTBC species and lineages among isolates from pulmonary TB cases over an 8-year period, 2007-2014.Mycobacteri…	eng	PloS one	PLoS One	101285081	2016			11	8	e0161892	Internet	Dorothy Yeboah-Manu	Yeboah-Manu, D; Asare, P; Asante-Poku, A; Otchere, ID; Osei-Wusu, S; Danso, E; Forson, A; Koram, KA; Gagneux, S	Noguchi Memorial Institute for Medical Research, University of Ghana, Legon, Accra, Ghana.	journal
	1		Greenland	1				1	0	0	KEW				PubMed	329886	27615360	10.1038/srep33180	Tracing Mycobacterium tuberculosis transmission by whole genome sequencing in a high incidence setting: a retrospective population-based study in East Greenland	In East Greenland, a dramatic increase of tuberculosis (TB) incidence has been observed in recent years. Classical genotyping suggests a genetically similar Mycobacterium tuberculosis (Mtb) strain population as cause, however, precise transmission patterns are unclear. We performed whole genome sequencing (WGS) of Mtb isolates from 98% of culture-positive TB cases through 21?years (n?=?182) which…	eng	Scientific reports	Sci Rep	101563288	2016	Sep		6		33180	Internet	K Bjorn-Mortensen	Bjorn-Mortensen, K; Soborg, B; Koch, A; Ladefoged, K; Merker, M; Lillebaek, T; Andersen, AB; Niemann, S; Kohl, TA	Department of Epidemiology Research, Statens Serum Institut, Copenhagen, Denmark.	journal
	1		Cameroon	1				1	0	0	KEW				PubMed	328747	28119925	10.1155/2016/2904832	Genetic Structure and Drug Susceptibility Patterns of Mycobacterium tuberculosis Complex Strains Responsible of Human Pulmonary Tuberculosis in the Major Rearing Region in Cameroon	Background. Cameroon this last decade continues to present a low contribution of M. africanum and M. bovis in human tuberculosis (TB), while M. bovis was prevalent in cattle but all these pieces of information only concerned West and Center regions. Methods. We carried out the first study in Adamaoua, one of the most rearing regions of Cameroon, on the genetic structure and drug susceptibility of…	eng	BioMed research international	Biomed Res Int	101600173	2016			2016		2904832	Internet	Francioli Koro Koro	Koro Koro, F; Um Boock, A; Kaiyven, AL; Noeske, J; Gutierrez, C; Kuaban, C; Etoa, FX; Eyangoh, SI	Mycobacteriology Service, Reference Laboratory of NTP, Centre Pasteur of Cameroon, Cameroon-Pasteur Institute International Network, Yaoundé, Cameroon; Department of Biochemistry, Faculty of Sciences, University of Douala, Yaoundé, Cameroon.	journal
	1		Mexico	1				1	0	0	LPW				PubMed	328587	25257651	10.1111/apm.12312	Description of the population structure and genetic diversity of tuberculosis in Estado de México, a low prevalence setting from Mexico	In order to identify the genetic characteristics of the strains of mycobacteria circulating in the Estado de México, one of the states with the lowest prevalence of tuberculosis in Mexico, spoligotyping and 12-loci MIRU-VNTR typing were used to genotype tuberculosis clinical isolates. The average age of the 183 patients analyzed was 50 (± 17) years, drug resistance was noted in 57 (31%) and multi…	eng	APMIS : acta pathologica, microbiologica, et immunologica Scandinavica	APMIS	8803400	2015	Feb		123	2	116-22	Internet	Roberto Zenteno-Cuevas	Zenteno-Cuevas, R; Mendoza-Damián, F; Muñoz, IC; Enciso-Moreno, L; Pérez-Navarro, LM; Ramírez-Hernández, MD; Vázquez-Medina, K; Widrobo-García, L; Lauzardo, M; Enciso-Moreno, JA	Instituto de Salud Pública, Universidad Veracruzana, Jalapa, Veracruz, México.	journal
	1		Taiwan	1				1	1	0	KEW				PubMed	329368	25629610	10.1371/journal.pone.0117061	Molecular epidemiology of tuberculosis in Kaohsiung City located at southern Taiwan, 2000-2008	We present the first comprehensive analysis of Mycobacterium tuberculosis (MTB) isolates circulating in southern Taiwan. In this 9-year population-based study, the TB situation in the Kaohsiung region was characterized by genotypic analysis of 421 MTB isolates.All 421 isolates of MTB were analyzed by spoligotyping and MIRU-VNTR typing. Drug-resistance patterns were also analyzed.The percentage of…	eng	PloS one	PLoS One	101285081	2015			10	1	e0117061	Internet	Yih-Yuan Chen	Chen, YY; Chang, JR; Kuo, SC; Tseng, FC; Huang, WC; Huang, TS; Chen, YS; Chiueh, TS; Sun, JR; Su, IJ; Dou, HY	National Institute of Infectious Diseases and Vaccinology, National Health Research Institutes, Zhunan, Miaoli, Taiwan; Department of Internal Medicine, Ditmanson Medical Foundation Chiayi Christian Hospital, Chiaya City, Taiwan.	journal
	1		Chile	1				1	1	0	LPW				PubMed	328526	25671320	10.1371/journal.pone.0118007	A first insight on the population structure of Mycobacterium tuberculosis complex as studied by spoligotyping and MIRU-VNTRs in Santiago, Chile	Tuberculosis (TB) remains a significant public health problem worldwide, but the ecology of the prevalent mycobacterial strains, and their transmission, can vary depending on country and region. Chile is a country with low incidence of TB, that has a geographically isolated location in relation to the rest of South American countries due to the Andes Mountains, but recent migration from neighbori…	eng	PloS one	PLoS One	101285081	2015			10	2	e0118007	Internet	María Elvira Balcells	Balcells, ME; García, P; Meza, P; Peña, C; Cifuentes, M; Couvin, D; Rastogi, N	Infectious Diseases Department, School of Medicine, Pontificia Universidad Católica de Chile, Santiago, Chile.	journal
	1	unclear or convenience sampling method	Ethiopia	0	1	collected all recently diagnosed cases		1	0	0	KEW				PubMed	358488	25673798	10.1128/JCM.03566-14	Mycobacterium tuberculosis lineage 7 strains are associated with prolonged patient delay in seeking treatment for pulmonary tuberculosis in Amhara Region, Ethiopia	Recent genotyping studies of Mycobacterium tuberculosis in Ethiopia have reported the identification of a new phylogenetically distinct M. tuberculosis lineage, lineage 7. We therefore investigated the genetic diversity and association of specific M. tuberculosis lineages with sociodemographic and clinical parameters among pulmonary TB patients in the Amhara Region, Ethiopia. DNA was isolated fro…	eng	Journal of clinical microbiology	J Clin Microbiol	7505564	2015	Apr		53	4	1301-9	Internet	Solomon A Yimer	Yimer, SA; Norheim, G; Namouchi, A; Zegeye, ED; Kinander, W; Tønjum, T; Bekele, S; Mannsåker, T; Bjune, G; Aseffa, A; Holm-Hansen, C	Department of Microbiology, Unit for Genome Dynamics, Oslo University Hospital, Nydalen, Oslo, Norway Department of Bacteriology and Immunology, Norwegian Institute of Public Health, Division of Infectious Disease Control, Nydalen, Oslo, Norway Institute of Health and Society, Section for International Health, Faculty of Medicine, University of Oslo, Blindern, Oslo, Norway Amhara Regional State H…	journal
	1		Mexico	1				1	0	0	LPW				PubMed	328707	25695431	10.1371/journal.pone.0118095	Genetic diversity of Mycobacterium tuberculosis from Guadalajara, Mexico and identification of a rare multidrug resistant Beijing genotype	Determining the genetic diversity of M. tuberculosis strains allows identification of the distinct Mycobacterium tuberculosis genotypes responsible for tuberculosis in different regions. Several studies have reported the genetic diversity of M. tuberculosis strains in Mexico, but little information is available from the state of Jalisco. Therefore, the aim of this study was to determine the genet…	eng	PloS one	PLoS One	101285081	2015			10	2	e0118095	Internet	Samantha Flores-Treviño	Flores-Treviño, S; Morfín-Otero, R; Rodríguez-Noriega, E; González-Díaz, E; Pérez-Gómez, HR; Bocanegra-García, V; Vera-Cabrera, L; Garza-González, E	Servicio de Gastroenterología, Hospital Universitario Dr. José Eleuterio González, Universidad Autónoma de Nuevo León, Monterrey, Nuevo León, México.	journal
	1		Malawi	1				1	0	0	LPW				PubMed	329269	25732036	10.7554/eLife.05166	Large-scale whole genome sequencing of M tuberculosis provides insights into transmission in a high prevalence area	To improve understanding of the factors influencing tuberculosis transmission and the role of pathogen variation, we sequenced all available specimens from patients diagnosed over 15 years in a whole district in Malawi. Mycobacterium tuberculosis lineages were assigned and transmission networks constructed, allowing ?10 single nucleotide polymorphisms (SNPs) difference. We defined disease as due …	eng	eLife	Elife	101579614	2015	Mar		4			Internet	J A Guerra-Assunção	Guerra-Assunção, JA; Crampin, AC; Houben, RM; Mzembe, T; Mallard, K; Coll, F; Khan, P; Banda, L; Chiwaya, A; Pereira, RP; McNerney, R; Fine, PE; Parkhill, J; Clark, TG; Glynn, JR	Faculty of Epidemiology and Population Health, London School of Hygiene and Tropical Medicine, London, United Kingdom.	journal
	1		Peru	1				1	1	0	KEW				PubMed	329722	25809979	10.1128/JCM.03585-14	Predominant Mycobacterium tuberculosis Families and High Rates of Recent Transmission among New Cases Are Not Associated with Primary Multidrug Resistance in Lima, Peru	Sputum samples from new tuberculosis (TB) cases were collected over 2 years as part of a prospective study in the northeastern part of Lima, Peru. To measure the contribution of recent transmission to the high rates of multidrug resistance (MDR) in this area, Mycobacterium tuberculosis complex (MTBc) isolates were tested for drug susceptibility to first-line drugs and were genotyped by spoligotyp…	eng	Journal of clinical microbiology	J Clin Microbiol	7505564	2015	Jun		53	6	1854-63	Internet	Francesca Barletta	Barletta, F; Otero, L; de Jong, BC; Iwamoto, T; Arikawa, K; Van der Stuyft, P; Niemann, S; Merker, M; Uwizeye, C; Seas, C; Rigouts, L	Institute of Tropical Medicine Alexander von Humboldt, Cayetano Heredia University, Lima, Peru francescabarletta@yahoo.es.	journal
unclear	1		China	1				1	0	0	LPW				PubMed	329273	25903578	10.1128/JCM.03507-14	Mixed Infections and Rifampin Heteroresistance among Mycobacterium tuberculosis Clinical Isolates	Mixed infections and heteroresistance of Mycobacterium tuberculosis contribute to the difficulty of diagnosis, treatment, and control of tuberculosis. However, there is still no proper solution for these issues. This study aimed to investigate the potential relationship between mixed infections and heteroresistance and to determine the high-risk groups related to these factors. A total of 499 res…	eng	Journal of clinical microbiology	J Clin Microbiol	7505564	2015	Jul		53	7	2138-47	Internet	Chao Zheng	Zheng, C; Li, S; Luo, Z; Pi, R; Sun, H; He, Q; Tang, K; Luo, M; Li, Y; Couvin, D; Rastogi, N; Sun, Q	Key Laboratory of Bio-Resources and Eco-Environment of the Ministry of Education, College of Life Sciences, Sichuan University, Chengdu, Sichuan, People's Republic of China.	journal
	1		India	1				1	0	0	KEW				PubMed	303760	25905900	10.1371/journal.pone.0124260	Prevalence and risk factors for adult pulmonary tuberculosis in a metropolitan city of South India	The present study measured the community prevalence and risk factors of adult pulmonary tuberculosis (PTB) in Chennai city, and also studied geographical distribution and the presence of different M. tuberculosis strains in the survey area.A community-based cross sectional survey was carried out from July 2010 to October 2012 in Chennai city. Prevalence of bacteriologically positive PTB was estim…	eng	PloS one	PLoS One	101285081	2015			10	4	e0124260	Internet	Baskaran Dhanaraj	Dhanaraj, B; Papanna, MK; Adinarayanan, S; Vedachalam, C; Sundaram, V; Shanmugam, S; Sekar, G; Menon, PA; Wares, F; Swaminathan, S	National Institute for Research in Tuberculosis, Chennai, India.	journal
unclear	1	drug resistance available	Peru	1				1	0	0	KEW				PubMed	329864	25984723	10.1371/journal.pone.0126271	The Association between Mycobacterium Tuberculosis Genotype and Drug Resistance in Peru	The comparison of Mycobacterium tuberculosis bacterial genotypes with phenotypic, demographic, geospatial and clinical data improves our understanding of how strain lineage influences the development of drug-resistance and the spread of tuberculosis.To investigate the association of Mycobacterium tuberculosis bacterial genotype with drug-resistance. Drug susceptibility testing together with genot…	eng	PloS one	PLoS One	101285081	2015			10	5	e0126271	Internet	Louis Grandjean	Grandjean, L; Iwamoto, T; Lithgow, A; Gilman, RH; Arikawa, K; Nakanishi, N; Martin, L; Castillo, E; Alarcon, V; Coronel, J; Solano, W; Aminian, M; Guezala, C; Rastogi, N; Couvin, D; Sheen, P; Zimic, M; Moore, DA	Wellcome Centre for Clinical Tropical Medicine, Imperial College London, St Mary's Campus, Norfolk Place, London, United Kingdom; London School of Hygiene and Tropical Medicine, TB Centre and Department of Clinical Research, Keppel St., London, United Kingdom; Laboratorio de Investigacion y Desarrollo, Universidad Peruana Cayetano Heredia, San Martin de Porres, Lima, Peru.	journal
	1	spoligotypes available in binary but unextractable	Colombia	1				1	0	0	LPW				PubMed	329677	26066494	10.1371/journal.pone.0124308	Mycobacterium tuberculosis Genotypes Determined by Spoligotyping to Be Circulating in Colombia between 1999 and 2012 and Their Possible Associations with Transmission and Susceptibility to First-Line Drugs	Tuberculosis (TB) remains a primary public health problem worldwide. The number of multidrug-resistant tuberculosis (MDR TB) cases has increased in recent years in Colombia. Knowledge of M. tuberculosis genotypes defined by spoligotyping can help determine the circulation of genotypes that must be controlled to prevent the spread of TB.To describe the genotypes of M. tuberculosis using spoligotyp…	eng	PloS one	PLoS One	101285081	2015			10	6	e0124308	Internet	Gloria Puerto	Puerto, G; Erazo, L; Wintaco, M; Castro, C; Ribón, W; Guerrero, MI	Dirección de Investigación en Salud Pública, Grupo de Micobacterias, Instituto Nacional de Salud, Bogotá, Colombia.	journal
	1		Ethiopia	1				1	0	0	LPW				PubMed	329727	26180642	10.1155/2015/215015	Prevalence of Tuberculosis, Drug Susceptibility Testing, and Genotyping of Mycobacterial Isolates from Pulmonary Tuberculosis Patients in Dessie, Ethiopia	Due to their initially seemingly high cost, timely diagnosis and effective treatment of tuberculosis (TB) are usually hampered by lack or shortage of resources in many high TB burden countries. However, the benefits of effective treatment can eventually outweigh those of empirical treatment. Here, a cross-sectional study was conducted on samples from smear-positive new and retreatment TB patients…	eng	Tuberculosis research and treatment	Tuberc Res Treat	101576351	2015			2015		215015	Print	Minwuyelet Maru	Maru, M; Mariam, SH; Airgecho, T; Gadissa, E; Aseffa, A	Armauer Hansen Research Institute, P.O. Box 1005, Jimma Road, Addis Ababa, Ethiopia.	journal
	1		Ethiopia	1				1	0	0	KEW				PubMed	329518	26245282	10.1186/s12889-015-2105-7	Molecular typing and drug sensitivity testing of Mycobacterium tuberculosis isolated by a community-based survey in Ethiopia	The identification of circulating TB strains in the community and drug sensitivity patterns is essential for the tuberculosis control program. This study was undertaken to identify M. tuberculosis strains circulating in selected communities in Ethiopia as well as to evaluate the drug sensitivity pattern of these strains.This study was a continuation of the Ethiopian National TB Prevalence Survey …	eng	BMC public health	BMC Public Health	100968562	2015	Aug		15		751	Internet	Muluwork Getahun	Getahun, M; Ameni, G; Kebede, A; Yaregal, Z; Hailu, E; Medihn, G; Demssie, D; Girmachew, F; Fiseha, Y; Meaza, A; Dirse, N; Agonafir, M; Dana, F; Tsegaye, F; Alebachew, Z; Abebe, A; Kebede, A; Lemma, E	Ethiopian Public Health Institute, Addis Ababa, Ethiopia. mimishaget@yahoo.com.	journal
	1		Morocco	1				1	1	0	KEW				PubMed	329529	26285026	10.1371/journal.pone.0135695	Molecular Typing of Mycobacterium Tuberculosis Complex by 24-Locus Based MIRU-VNTR Typing in Conjunction with Spoligotyping to Assess Genetic Diversity of Strains Circulating in Morocco	Standard 24-locus Mycobacterial Interspersed Repetitive Unit Variable Number Tandem Repeat (MIRU-VNTR) typing allows to get an improved resolution power for tracing TB transmission and predicting different strain (sub) lineages in a community.During 2010-2012, a total of 168 Mycobacterium tuberculosis Complex (MTBC) isolates were collected by cluster sampling from 10 different Moroccan cities, an…	eng	PloS one	PLoS One	101285081	2015			10	8	e0135695	Internet	Nada Bouklata	Bouklata, N; Supply, P; Jaouhari, S; Charof, R; Seghrouchni, F; Sadki, K; El Achhab, Y; Nejjari, C; Filali-Maltouf, A; Lahlou, O; El Aouad, R	National Tuberculosis Reference Laboratory, National Institute of Hygiene, Rabat, Morocco; Laboratory of Microbiology and Molecular Biology, Faculty of Sciences, University Mohammed V, Rabat, Morocco.	journal
	1		Indonesia	1				1	0	0	KEW				PubMed	329379	26297576	10.1186/s12879-015-1101-y	Molecular epidemiology study of Mycobacterium tuberculosis and its susceptibility to anti-tuberculosis drugs in Indonesia	Genotyping of Mycobacterium tuberculosis helps to understand the molecular epidemiology of tuberculosis and to address evolutionary questions about the disease spread. Certain genotypes also have implications for the spread of infection and treatment. Indonesia is a very diverse country with a population with multiple ethnicities and cultures and a history of many trade and tourism routes. This s…	eng	BMC infectious diseases	BMC Infect Dis	100968551	2015	Aug		15		366	Internet	Vivi Lisdawati	Lisdawati, V; Puspandari, N; Rif'ati, L; Soekarno, T; M, M; K, S; Ratnasari, L; Izzatun, N; Parwati, I	Institute for Vector and Reservoir Disease Control Research and Development (IVRDCRD), Salatiga, Indonesia. vivi_l@litbang.depkes.go.id.	journal
	1		Ethiopia	1				1	1	0	KEW				PubMed	328705	26491657	10.1155/2015/174732	Genetic Diversity of Mycobacterium tuberculosis Complex Isolated from Tuberculosis Patients in Bahir Dar City and Its Surroundings, Northwest Ethiopia	The knowledge of the diversity of strains of Mycobacterium tuberculosis complex (MTBC) species in a specific geographical region can contribute to the control of tuberculosis (TB). This study was conducted to identify the MTBC isolates to the species and spoligotype international type (SIT) level by spoligotyping. A total of 168 MTBC isolates were recovered from TB patients, spoligotyped, and the…	eng	BioMed research international	Biomed Res Int	101600173	2015			2015		174732	Internet	Anwar Nuru	Nuru, A; Mamo, G; Worku, A; Admasu, A; Medhin, G; Pieper, R; Ameni, G	Aklilu Lemma Institute of Pathobiology, Addis Ababa University, P.O. Box 1176, Addis Ababa, Ethiopia ; Faculty of Veterinary Medicine, University of Gondar, P.O. Box 346, Gondar, Ethiopia.	journal
	1		Russia	1				1	1	0	KEW				PubMed	329889	26679959	10.1186/s12866-015-0613-3	Trends in molecular epidemiology of drug-resistant tuberculosis in Republic of Karelia, Russian Federation	Russian Republic of Karelia is located at the Russian-Finnish border. It contains most of the historical Karelia land inhabited with autochthonous Karels and more recently migrated Russians. Although tuberculosis (TB) incidence in Karelia is decreasing, it remains high (45.8/100 000 in 2014) with the rate of multi-drug resistance (MDR) among newly diagnosed TB patients reaching 46.5 %. The study …	eng	BMC microbiology	BMC Microbiol	100966981	2015	Dec		15		279	Internet	Igor Mokrousov	Mokrousov, I; Vyazovaya, A; Solovieva, N; Sunchalina, T; Markelov, Y; Chernyaeva, E; Melnikova, N; Dogonadze, M; Starkova, D; Vasilieva, N; Gerasimova, A; Kononenko, Y; Zhuravlev, V; Narvskaya, O	Laboratory of Molecular Microbiology, St. Petersburg Pasteur Institute, 14 Mira street, St. Petersburg, 197101, Russia. imokrousov@mail.ru.	journal
	1		Algeria	1				1	0	0	LPW				PubMed	328742	26964810	10.1016/j.ijmyco.2015.06.004	Genetic diversity of Mycobacterium tuberculosis strains isolated in Algeria: Results of spoligotyping	Molecular typing tools, including spoligotyping, are currently widely used in the monitoring and study of the dynamics of tuberculosis epidemics.A study of the molecular profile of a sample of 129 Myobacterium tuberculosis strains isolated during 2011 was carried out in the National Reference Laboratory for Tuberculosis and Mycobacteria at the Pasteur Institute of Algeria. This sample was selecte…	eng	International journal of mycobacteriology	Int J Mycobacteriol	101615660	2015	Dec		4	4	290-5	Internet	Malika Ifticene	Ifticene, M; Kaïdi, S; Khechiba, MM; Yala, D; Boulahbal, F	National Reference Laboratory for Tuberculosis (NRL-TB), Pasteur Institute of Algeria, Algiers, Algeria. Electronic address: ifticene.ma@yahoo.fr.	journal
hospital	1		Iran	1				1	0	0	LPW				PubMed	328842	24189362	10.4269/ajtmh.13-0057	High prevelance of rifampin-monoresistant tuberculosis: a retrospective analysis among Iranian pulmonary tuberculosis patients	We determined the prevalence of rifampin-monoresistant tuberculosis (RMR-TB) in Iran. Because development of RMR-TB is not common, we also identified the major risk factors associated with RMR-TB reported from different provinces of Iran. Data for 3,020 TB patients who remained or became smear positive after two, four, six, and nine months of standard first-line chemotherapy were retrospectively …	eng	The American journal of tropical medicine and hygiene	Am J Trop Med Hyg	370507	2014	Jan		90	1	99-105	Internet	Ali Akbar Velayati	Velayati, AA; Farnia, P; Mozafari, M; Sheikholeslami, MF; Karahrudi, MA; Tabarsi, P; Hoffner, S	Mycobacteriology Research Centre, Clinical Tuberculosis and Epidemiology Research Center, National Research Institute of Tuberculosis and Lung Disease (NRITLD), Shahid Beheshti University of Medical Sciences, Tehran, Iran; World Health Organization Supranational Reference Laboratory for Tuberculosis, Swedish Institute for Communicable Disease Control, Stockholm, Sweden.	journal
	1	Need combined Uganda I&II category	Croatia	1				1	0	0	LPW				PubMed	328678	24274708	10.3109/00365548.2013.855322	First insights into the molecular epidemiology of tuberculosis in Croatia during a three-year period, 2009 to 2011	Mycobacterium tuberculosis still represents a serious cause of morbidity and mortality worldwide. The aim of this study was to determine the transmission rate and genetic lineages of M. tuberculosis circulating in Croatia during a 3-y period, between 2009 and 2011.A total of 1587 M. tuberculosis strains (1 strain per tuberculosis patient) isolated in Croatia from 2009 to 2011 were genotyped using…	eng	Scandinavian journal of infectious diseases	Scand J Infect Dis	215333	2014	Feb		46	2	123-9	Internet	Ljiljana Zmak	Zmak, L; Obrovac, M; Katalinic Jankovic, V	From the National Mycobacteria Reference Laboratory, Croatian National Institute of Public Health , Zagreb , Croatia.	journal
	1		China	1				1	0	0	LPW				PubMed	328827	24359517	10.3109/00365548.2013.858182	Genotypes of Mycobacterium tuberculosis isolates in rural China: using MIRU-VNTR and spoligotyping methods	The genotypes of Mycobacterium tuberculosis (MTB) have been found to be related to the risk of transmission and the development of drug resistance of this pathogen. Thus, exploring the molecular characteristics of MTB is helpful for understanding and controlling the spread of strains in areas with a high incidence of tuberculosis.We recruited 512 sputum smear-positive tuberculosis patients from 3…	eng	Scandinavian journal of infectious diseases	Scand J Infect Dis	215333	2014	Feb		46	2	98-106	Internet	Wei Lu	Lu, W; Lu, B; Liu, Q; Dong, H; Shao, Y; Jiang, Y; Song, H; Chen, C; Li, G; Xu, W; Zhao, X; Wan, K; Zhu, L	From the Department of Chronic Communicable Disease, Center for Disease Control and Prevention of Jiangsu Province , Nanjing.	journal
	1		Mexico	1				1	0	0	LPW				PubMed	329277	24395541	10.1002/jcla.21650	Molecular assessment, drug-resistant profile, and spacer oligonucleotide typing (spoligotyping) of Mycobacterium tuberculosis strains from Tamaulipas, México	Tuberculosis remains a serious global health problem involving one-third of the world population. A wide diversity of Mycobacterium tuberculosis strains cause about 1.5 million deaths/year worldwide, but in developing countries, the genetic diversity of M. tuberculosis strains remains largely unknown. We conducted a first insight into the population diversity of M. tuberculosis strains from Tamau…	eng	Journal of clinical laboratory analysis	J Clin Lab Anal	8801384	2014	Mar		28	2	97-103	Internet	Virgilio Bocanegra-García	Bocanegra-García, V; Garza-González, E; Cruz-Pulido, WL; Guevara-Molina, YL; Cantú-Ramírez, R; González, GM; Rivera, G; Palma-Nicolas, JP	Laboratorio de Medicina de Conservación, Centro de Biotecnología Genómica, Instituto Politécnico Nacional, Reynosa, Tamaulipas, México.	journal
	1		China	1				1	0	0	LPW				PubMed	328850	24412724	10.1016/j.meegid.2013.12.023	Increased genetic diversity of the Mycobacterium tuberculosis W-Beijing genotype that predominates in eastern China	To determine the genetic diversity of Mycobacterium tuberculosis (M. tuberculosis) strains in a Chinese population predominately infected with strains of the W-Beijing family.A cross-sectional study was conducted in three counties of eastern China. M. tuberculosis strains were collected at TB clinics, and patients were interviewed by trained physicians at the time of TB diagnosis. RD105 and RD181…	eng	Infection, genetics and evolution : journal of molecular epidemiology and evolutionary genetics in infectious diseases	Infect Genet Evol	101084138	2014	Mar		22		23-9	Internet	Meiling Liu	Liu, M; Jiang, W; Liu, Y; Zhang, Y; Wei, X; Wang, W	School of Public Health & Key Laboratory of Public Health Safety (Ministry of Education), Fudan University, Shanghai, China; Hongkou District Center for Disease Control and Prevention, Shanghai, China.	journal
	1		Russia	1				1	0	0	KEW				PubMed	328652	24464101	10.1038/ng.2878	Evolution and transmission of drug-resistant tuberculosis in a Russian population	The molecular mechanisms determining the transmissibility and prevalence of drug-resistant tuberculosis in a population were investigated through whole-genome sequencing of 1,000 prospectively obtained patient isolates from Russia. Two-thirds belonged to the Beijing lineage, which was dominated by two homogeneous clades. Multidrug-resistant (MDR) genotypes were found in 48% of isolates overall an…	eng	Nature genetics	Nat Genet	9216904	2014	Mar		46	3	279-86	Internet	Nicola Casali	Casali, N; Nikolayevskyy, V; Balabanova, Y; Harris, SR; Ignatyeva, O; Kontsevaya, I; Corander, J; Bryant, J; Parkhill, J; Nejentsev, S; Horstmann, RD; Brown, T; Drobniewski, F	Public Health England (PHE) National Mycobacterium Reference Laboratory, Clinical TB and HIV Group, Blizard Institute, Queen Mary University of London, London, UK.	journal
	1	drug resistance only	South Africa	0	1	collected all cases, not just drug resistant cases		1	0	0	KEW				PubMed	358489	24565645	10.3201/eid2003.131083	Minimal diversity of drug-resistant Mycobacterium tuberculosis strains, South Africa	Multidrug- (MDR) and extensively drug-resistant tuberculosis (XDR TB) are commonly associated with Beijing strains. However, in KwaZulu-Natal, South Africa, which has among the highest incidence and mortality for MDR and XDR TB, data suggest that non-Beijing strains are driving the epidemic. We conducted a retrospective study to characterize the strain prevalence among drug-susceptible, MDR, and …	eng	Emerging infectious diseases	Emerg Infect Dis	9508155	2014	Mar		20	3	426-33	Internet	Neel R Gandhi	Gandhi, NR; Brust, JC; Moodley, P; Weissman, D; Heo, M; Ning, Y; Moll, AP; Friedland, GH; Sturm, AW; Shah, NS		journal
	1		Ethiopia	1				1	1	0	KEW				PubMed	329862	24734230	10.1155/2014/238532	Strain diversity of Mycobacterium tuberculosis isolates from pulmonary tuberculosis patients in Afar pastoral region of Ethiopia	Data on genotypic diversity of Mycobacterium tuberculosis complex (MTBC) is important to understand its epidemiology, human adaptation, clinical phenotypes, and drug resistance. This study aimed to characterize MTBC clinical isolates circulating in a predominantly pastoralist area in Ethiopia, a country where tuberculosis is the second leading cause of mortality. Culture of sputum samples collect…	eng	BioMed research international	Biomed Res Int	101600173	2014			2014		238532	Internet	Mulugeta Belay	Belay, M; Ameni, G; Bjune, G; Couvin, D; Rastogi, N; Abebe, F	Aklilu Lemma Institute of Pathobiology, Addis Ababa University, P.O. Box 1176, Addis Ababa, Ethiopia ; Section for International Health, Department of Community Medicine, Institute for Health and Society, University of Oslo, P.O. Box 1130, Blindern, 0318 Oslo, Norway.	journal
	1		Uganda	1				1	0	0	LPW				PubMed	329882	24777100	10.1128/AAC.02338-13	The T2 Mycobacterium tuberculosis genotype, predominant in Kampala, Uganda, shows negative correlation with antituberculosis drug resistance	Surveillance of the circulating Mycobacterium tuberculosis complex (MTC) strains in a given locality is important for understanding tuberculosis (TB) epidemiology. We performed molecular epidemiological studies on sputum smear-positive isolates that were collected for anti-TB drug resistance surveillance to establish the variability of MTC lineages with anti-TB drug resistance and HIV infection. …	eng	Antimicrobial agents and chemotherapy	Antimicrob Agents Chemother	315061	2014	Jul		58	7	3853-9	Internet	Deus Lukoye	Lukoye, D; Katabazi, FA; Musisi, K; Kateete, DP; Asiimwe, BB; Okee, M; Joloba, ML; Cobelens, FG	National Tuberculosis and Leprosy Program, Kampala, Uganda.	journal
	1		Italy	1				1	0	0	LPW				PubMed	328680	24820340	10.1016/j.meegid.2014.05.004	Four year longitudinal study of Mycobacterium tuberculosis complex isolates in a region of North-Eastern Italy	Recent reports have suggested a change of Mycobacterium tuberculosis complex genetic diversity in Western Europe due to an increasing proportion of imported cases of tuberculosis (TB). This study analyzed a total of 705 M. tuberculosis strains isolated from 2006 to 2009 in Veneto, a North-Eastern Italian region, to see the impact of foreign-born cases vs. Italian patients on prevailing TB epidemi…	eng	Infection, genetics and evolution : journal of molecular epidemiology and evolutionary genetics in infectious diseases	Infect Genet Evol	101084138	2014	Aug		26		58-64	Internet	Loredana Fallico	Fallico, L; Couvin, D; Peracchi, M; Pascarella, M; Franchin, E; Lavezzo, E; Rassu, M; Manganelli, R; Rastogi, N; Palù, G	Department of Molecular Medicine, University of Padova, Padova, Italy; U.O. Microbiologia e Virologia, Azienda Ospedaliera di Padova, Padova, Italy.	journal
	1		Tanzania	1				1	0	0	KEW				PubMed	328852	24903071	10.1186/1471-2334-14-309	Increased level of acute phase reactants in patients infected with modern Mycobacterium tuberculosis genotypes in Mwanza, Tanzania	There is increasing evidence to suggest that different Mycobacterium tuberculosis lineages cause variations in the clinical presentation of tuberculosis (TB). Certain M. tuberculosis genotypes/lineages have been shown to be more likely to cause active TB in human populations from a distinct genetic ancestry. This study describes the genetic biodiversity of M. tuberculosis genotypes in Mwanza city…	eng	BMC infectious diseases	BMC Infect Dis	100968551	2014	Jun		14		309	Internet	Ruth Stavrum	Stavrum, R; PrayGod, G; Range, N; Faurholt-Jepsen, D; Jeremiah, K; Faurholt-Jepsen, M; Krarup, H; Aabye, MG; Changalucha, J; Friis, H; Andersen, AB; Grewal, HM	Department of Clinical Science, Infection, Faculty of Medicine and Dentristry, University of Bergen, Bergen, Norway. Ruth.Stavrum@gades.uib.no.	journal
	1	microdata available in supplement, binary code available in main text in shaded box form, only extracted SIT number	China	1				1	0	0	LPW				PubMed	328672	24911588	10.1371/journal.pone.0099357	First insight into the genotypic diversity of clinical Mycobacterium tuberculosis isolates from Gansu Province, China	Investigations of Mycobacterium tuberculosis genetic diversity in China have indicated a significant regional distribution. The aim of this study was to characterize the genotypes of clinical M. tuberculosis isolates obtained from Gansu, which has a special geographic location in China.A total of 467 clinical M. tuberculosis strains isolated in Gansu Province were genotyped by 15-locus mycobacter…	eng	PloS one	PLoS One	101285081	2014			9	6	e99357	Internet	Jie Liu	Liu, J; Tong, C; Liu, J; Jiang, Y; Zhao, X; Zhang, Y; Liu, H; Lu, B; Wan, K	State Key Laboratory for Infectious Disease Prevention and Control, National Institute for Communicable Disease Control and Prevention, Chinese Center for Disease Control and Prevention, Changping, Beijing, People's Republic of China; Collaborative Innovation Center for Diagnosis and Treatment of Infectious Diseases, Hangzhou, Zhejiang, People's Republic of China; Beijing Chaoyang District Center…	journal
method, unclear	1	New method testing	Georgia	1				1	0	0	LPW				PubMed	329698	25001491	10.1186/1471-2164-15-572	Optimizing multiplex SNP-based data analysis for genotyping of Mycobacterium tuberculosis isolates	Multiplex ligation-dependent probe amplification (MLPA) is a powerful tool to identify genomic polymorphisms. We have previously developed a single nucleotide polymorphism (SNP) and large sequence polymorphisms (LSP)-based MLPA assay using a read out on a liquid bead array to screen for 47 genetic markers in the Mycobacterium tuberculosis genome. In our assay we obtain information regarding the M…	eng	BMC genomics	BMC Genomics	100965258	2014	Jul		15		572	Internet	Sarah Sengstake	Sengstake, S; Bablishvili, N; Schuitema, A; Bzekalava, N; Abadia, E; de Beer, J; Tadumadze, N; Akhalaia, M; Tuin, K; Tukvadze, N; Aspindzelashvili, R; Bachiyska, E; Panaiotov, S; Sola, C; van Soolingen, D; Klatser, P; Anthony, R; Bergval, I	KIT Biomedical Research, Royal Tropical Institute, Meibergdreef 39, 1105 AZ Amsterdam, The Netherlands. s.sengstake@kit.nl.	journal
unclear	1		Israel	1				1	0	0	LPW				PubMed	329292	25189557	10.5588/ijtld.14.0186	Molecular epidemiology and mapping of tuberculosis in Israel: do migrants transmit the disease to locals?	Israel receives migrants from various countries, some of which have high tuberculosis (TB) prevalence.To assess the predominant Mycobacterium tuberculosis strains in Israel isolated during 2008-2010 among Israeli-born and migrant patients, and to investigate possible transmission of TB from migrants to the local population.Molecular characterisation employed 43-spacer spoligotyping and 16-loci my…	eng	The international journal of tuberculosis and lung disease : the official journal of the International Union against Tuberculosis and Lung Disease	Int J Tuberc Lung Dis	9706389	2014	Sep		18	9	1085-91	Internet	D Goldblatt	Goldblatt, D; Rorman, E; Chemtob, D; Freidlin, PJ; Cedar, N; Kaidar-Shwartz, H; Dveyrin, Z; Mor, Z	National Mycobacterium Reference Laboratory, National Public Health Laboratory, Ministry of Health, Tel Aviv, Israel.	journal
unclear	1		Taiwan	1				1	0	0	LPW				PubMed	328593	25393403	10.1371/journal.pone.0112633	Distinct modes of transmission of tuberculosis in aboriginal and non-aboriginal populations in Taiwan	Tuberculosis incidence among aborigines is significantly higher than for Han Chinese in Taiwan, but the extent to which Mycobacterium tuberculosis (MTB) strain characteristics contribute to this difference is not well understood. MTB isolates from aborigines and Han Chinese living in eastern and southern Taiwan, the major regions of aborigines, were analyzed by spoligotyping and 24-loci MIRU-VNTR…	eng	PloS one	PLoS One	101285081	2014			9	11	e112633	Internet	Yih-Yuan Chen	Chen, YY; Tseng, FC; Chang, JR; Kuo, SC; Lee, JJ; Yeh, JJ; Chiueh, TS; Sun, JR; Su, IJ; Dou, HY	National Institute of Infectious Diseases and Vaccinology, National Health Research Institutes, Zhunan, Miaoli, Taiwan.	journal
	1		Vietnam	1				1	0	0	LPW				PubMed	329695	25459163	10.1016/j.tube.2014.09.005	Mycobacterium tuberculosis strains spreading in Hanoi, Vietnam: Beijing sublineages, genotypes, drug susceptibility patterns, and host factors	Beijing genotype strains are divided into two major sublineages, ancient (atypical) and modern (typical) types, but their phenotypic variations remain largely unknown. Mycobacterium tuberculosis (MTB) isolates from Hanoi, Vietnam, were analyzed by single-nucleotide polymorphisms and spoligotyping. Patient information and drug susceptibility patterns were obtained. Genetic clustering was assessed …	eng	Tuberculosis (Edinburgh, Scotland)	Tuberculosis (Edinb)	100971555	2014	Dec		94	6	649-56	Internet	Shinji Maeda	Maeda, S; Hang, NT; Lien, LT; Thuong, PH; Hung, NV; Hoang, NP; Cuong, VC; Hijikata, M; Sakurada, S; Keicho, N		journal
	1	microdata available, unclear or convenience sampling method	Malaysia	0	1	The sample represents all culture-positive samples		1	0	0	KEW	requested clarification of sampling methods 11/3/17	"They are actually the collection of all culture-positive TB cases in our hospital."	Include	PubMed	358481	25502956	10.1371/journal.pone.0114832	Study of Mycobacterium tuberculosis complex genotypic diversity in Malaysia reveals a predominance of ancestral East-African-Indian lineage with a Malaysia-specific signature	Tuberculosis (TB) still constitutes a major public health problem in Malaysia. The identification and genotyping based characterization of Mycobacterium tuberculosis complex (MTBC) isolates causing the disease is important to determine the effectiveness of the control and surveillance programs.This study intended a first assessment of spoligotyping-based MTBC genotypic diversity in Malaysia follo…	eng	PloS one	PLoS One	101285081	2014			9	12	e114832	Internet	Fazli Ismail	Ismail, F; Couvin, D; Farakhin, I; Abdul Rahman, Z; Rastogi, N; Suraiya, S	Department of Medical Microbiology & Parasitology, School of Medical Sciences, Universiti Sains Malaysia, Kota Bharu, Kelantan, Malaysia.	journal
	1		Estonia	1				1	0	0	LPW				PubMed	328527	26393096	10.5588/pha.14.0045	A four-year nationwide molecular epidemiological study in Estonia: risk factors for tuberculosis transmission	Estonia has a high proportion of multidrug-resistant tuberculosis (MDR-TB). It is important to link molecular and epidemiological data to understand TB transmission patterns.To use 24-locus variable numbers of tandem repeat (VNTR) typing and national TB registry data in Estonia from 2009 to 2012 to identify the distribution of drug resistance patterns, Mycobacterium tuberculosis isolate clusterin…	eng	Public health action	Public Health Action	101624961	2014	Oct		4	Suppl 2	S34-40	Print	K Toit	Toit, K; Altraja, A; Acosta, CD; Viiklepp, P; Kremer, K; Kummik, T; Danilovitš, M; Van den Bergh, R; Harries, AD; Supply, P	United Laboratories, Tartu University Hospital, Tartu, Estonia ; Department of Pulmonary Medicine, University of Tartu, Tartu, Estonia.	journal
	1		Iraq	1				1	0	0	LPW				PubMed	329740	26786487	10.1016/j.ijmyco.2014.07.006	Snapshot of the genetic diversity of Mycobacterium tuberculosis isolates in Iraq	This study explored the genetic diversity of Mycobacterium tuberculosis isolates in Iraq by spoligotyping and 15-locus-based mycobacterial interspersed repetitive unit-variable number tandem repeat (MIRU-VNTR) methods. Initially, 270 isolates from 134 patients were collected and then 134 non-duplicating isolates (1 isolate/patient) were subjected to the study analyses, 70 isolates were found to b…	eng	International journal of mycobacteriology	Int J Mycobacteriol	101615660	2014	Sep		3	3	184-96	Internet	Mohanad Mohsin Ahmed	Ahmed, MM; Mohammed, SH; Nasurallah, HA; Ali, MM; Couvin, D; Rastogi, N	Department of Microbiology, College of Medicine, University of Kerbala, Iraq. Electronic address: dr.mohma.med.school@gmail.com.	journal
	1	Collected samples only during 4 months of the year from 21 to 27	Tanzania	1				1	0	0	LPW				PubMed	328745	26875299		Genetic profile of Mycobacterium tuberculosis and treatment outcomes in human pulmonary tuberculosis in Tanzania	Information on the different spoligotype families of Mycobacterium tuberculosis in Tanzania is limited, and where available, restricted to small geographical areas. This article describes the genetic profile of M tuberculosis across Tanzania and suggests how spoligotype families might affect drug resistance and treatment outcomes for smear positive pulmonary tuberculosis patients in Tanzania. We …	eng	Tanzania journal of health research	Tanzan J Health Res	101479163	2014	Apr		16	2	58-69	Print	Sayoki G M Mfinanga	Mfinanga, SG; Warren, RM; Kazwala, R; Kahwa, A; Kazimoto, T; Kimaro, G; Mfaume, S; Chonde, T; Ngadaya, E; Egwaga, S; Streicher, EM; Van Pittius, GN; Morkve, O; Cleaveland, S		journal
	1		UK	1				1	0	0	KEW				PubMed	328644	23019255	10.1136/thoraxjnl-2012-201824	Ethnicity and mycobacterial lineage as determinants of tuberculosis disease phenotype	Emerging evidence suggests that Mycobacterium tuberculosis (Mtb) lineage and host ethnicity can determine tuberculosis (TB) clinical disease patterns but their relative importance and interaction are unknown.We evaluated prospectively collected TB surveillance and Mtb strain typing data in an ethnically heterogeneous UK population. Lineage assignment was denoted using 15-loci mycobacterial inters…	eng	Thorax	Thorax	417353	2013	Mar		68	3	221-9	Internet	Manish Pareek	Pareek, M; Evans, J; Innes, J; Smith, G; Hingley-Wilson, S; Lougheed, KE; Sridhar, S; Dedicoat, M; Hawkey, P; Lalvani, A	Tuberculosis Research Unit, National Heart and Lung Institute, Imperial College London, London, UK.	journal
unclear	1		China	1				1	0	0	LPW				PubMed	329524	23183314	10.1016/j.meegid.2012.10.008	Molecular typing and drug susceptibility of Mycobacterium tuberculosis isolates from Chongqing Municipality, China	China's tuberculosis (TB) burden is second only to that of India worldwide. In Chongqing, the largest municipality in southwestern China, although the prevalence of both TB and drug-resistant TB is higher than in other municipalities, the molecular characteristics and drug susceptibility phenotypes are poorly known. In this study, 297 Mycobacterium tuberculosis isolates from Chongqing were genoty…	eng	Infection, genetics and evolution : journal of molecular epidemiology and evolutionary genetics in infectious diseases	Infect Genet Evol	101084138	2013	Jan		13		310-6	Internet	Dan Zhang	Zhang, D; An, J; Wang, J; Hu, C; Wang, Z; Zhang, R; Wang, Y; Pang, Y	Yongchuan Hospital, Chongqing Medical University, Chongqing, China.	journal
	1		Ireland	1				1	0	0	LPW				PubMed	328543	23351653		A snapshot of genetic lineages of Mycobacterium tuberculosis in Ireland over a two-year period, 2010 and 2011	Mycobacterial interspersed repetitive-unit-variable-number tandem repeat typing alone was used to investigate the genetic lineages among 361 Mycobacterium tuberculosis strains circulating in Ireland over a two-year period, 2010 and 2011. The majority of isolates, 63% (229/361), belonged to lineage 4 (Euro-American), while lineages 1 (Indo-Oceanic), 2 (East-Asian) and 3 (East-African–Indian) repre…	eng	Euro surveillance : bulletin Europeen sur les maladies transmissibles = European communicable disease bulletin	Euro Surveill	100887452	2013	Jan		18	3		Internet	M M Fitzgibbon	Fitzgibbon, MM; Gibbons, N; Roycroft, E; Jackson, S; O'Donnell, J; O'Flanagan, D; Rogers, TR	Irish Mycobacteria Reference Laboratory, St. James Hospital, Dublin, Ireland. MFitzgibbon@STJAMES.IE	journal
hospital	1	strain data not reported	Kiribati	0	1	Strain data is reported		1	0	0	LPW				PubMed	342540	23383187	10.1371/journal.pone.0055423	First molecular epidemiology study of Mycobacterium tuberculosis in Kiribati	Tuberculosis incidence rates in Kiribati are among the highest in the Western Pacific Region, however the genetic diversity of circulating Mycobacterium tuberculosis complex strains (MTBC) and transmission dynamics are unknown. Here, we analysed MTBC strains isolated from culture positive pulmonary tuberculosis (TB) cases from the main TB referral centre between November 2007 and October 2009. St…	eng	PloS one	PLoS One	101285081	2013			8	1	e55423	Internet	Eman Aleksic	Aleksic, E; Merker, M; Cox, H; Reiher, B; Sekawi, Z; Hearps, AC; Ryan, CE; Lee, AV; Goursaud, R; Malau, C; O'Connor, J; Cherry, CL; Niemann, S; Crowe, SM	Centre for Virology, Burnet Institute, Melbourne, Australia. eman@burnet.edu.au	journal
hospital	1	unclear about inclusion criteria, need to ask	Vietnam	1				1	0	0	LPW				PubMed	329893	23408848	10.1093/infdis/jit048	Tuberculosis relapse in Vietnam is significantly associated with Mycobacterium tuberculosis Beijing genotype infections	In Vietnam, the Mycobacterium tuberculosis Beijing genotype is associated with multi-drug resistance and is emerging. A possible explanation for this genotype's success is an increased rate of relapse.In a prospective cohort study, isolates from patients with smear-positive tuberculosis were subjected to drug susceptibility testing and to spoligotyping and variable number of tandem repeats typing…	eng	The Journal of infectious diseases	J Infect Dis	413675	2013	May		207	10	1516-24	Internet	Mai N T Huyen	Huyen, MN; Buu, TN; Tiemersma, E; Lan, NT; Dung, NH; Kremer, K; Soolingen, DV; Cobelens, FG	Pham Ngoc Thach Hospital, Ho Chi Minh, Vietnam.	journal
	1		Ethiopia	1				1	1	0	KEW				PubMed	329296	23496968	10.1186/1471-2334-13-131	Molecular epidemiology and transmission dynamics of Mycobacterium tuberculosis in Northwest Ethiopia: new phylogenetic lineages found in Northwest Ethiopia	Although Ethiopia ranks seventh among the world's 22 high-burden tuberculosis (TB) countries, little is known about strain diversity and transmission. In this study, we present the first in-depth analysis of the population structure and transmission dynamics of Mycobacterium tuberculosis strains from Northwest Ethiopia.In the present study, 244 M. tuberculosis isolates where analysed by mycobacte…	eng	BMC infectious diseases	BMC Infect Dis	100968551	2013	Mar		13		131	Internet	Belay Tessema	Tessema, B; Beer, J; Merker, M; Emmrich, F; Sack, U; Rodloff, AC; Niemann, S	Department of Medical Microbiology, College of Medicine and Health Sciences, University of Gondar, Gondar, Ethiopia. bt1488@yahoo.com	journal
hospital, unclear	1		USA	1				1	0	0	LPW				PubMed	328528	23501297	10.1016/j.meegid.2013.02.015	Allopatric tuberculosis host-pathogen relationships are associated with greater pulmonary impairment	Host pathogen relationships can be classified as allopatric, when the pathogens originated from separate, non-overlapping geographic areas from the host; or sympatric, when host and pathogen shared a common ancestral geographic location. It remains unclear if host-pathogen relationships, as defined by phylogenetic lineage, influence clinical outcome. We sought to examine the association between a…	eng	Infection, genetics and evolution : journal of molecular epidemiology and evolutionary genetics in infectious diseases	Infect Genet Evol	101084138	2013	Jun		16		433-40	Internet	Jotam G Pasipanodya	Pasipanodya, JG; Moonan, PK; Vecino, E; Miller, TL; Fernandez, M; Slocum, P; Drewyer, G; Weis, SE	Office for Global Health, UT Southwestern Medical Center, Dallas, TX, USA. jpasipanodya@hotmail.com	journal
	1	Non random sampling	New Zealand	0	1	Author indicated that the sample represented all culture-positive samples		1	0	0	LPW	Requested additional studies, if available	Response: nope no more studies he's aware of	Include	PubMed	358581	23635796	10.5588/ijtld.12.0795	Phylogenetic lineages of tuberculosis isolates in New Zealand and their association with patient demographics	In New Zealand, the lineage genotypes of Mycobacterium tuberculosis clinical isolates and their role in the epidemiology of tuberculosis (TB) are currently unknown.1) To measure the relative frequency of each phylogenetic lineage of the M. tuberculosis complex in New Zealand, and 2) to examine its relationship with patient demographics and multidrug-resistant TB (MDR-TB).All non-duplicate M. tube…	eng	The international journal of tuberculosis and lung disease : the official journal of the International Union against Tuberculosis and Lung Disease	Int J Tuberc Lung Dis	9706389	2013	Jul		17	7	892-7	Internet	S Yen	Yen, S; Bower, JE; Freeman, JT; Basu, I; O'Toole, RF	School of Biological Sciences, Victoria University of Wellington, Wellington, New Zealand.	journal
unclear	1		The Netherlands	1				1	1	0	LPW				PubMed	328577	23658260	10.1128/JCM.00489-13	Clustering of tuberculosis cases based on variable-number tandem-repeat typing in relation to the population structure of Mycobacterium tuberculosis in the Netherlands	The population structure of 3,776 Mycobacterium tuberculosis isolates was determined using variable-number tandem-repeat (VNTR) typing. The degree of clonality was so high that a more relaxed definition of clustering cannot be applied. Among recent immigrants with non-Euro-American isolates, transmission is overestimated if based on identical VNTR patterns.	eng	Journal of clinical microbiology	J Clin Microbiol	7505564	2013	Jul		51	7	2427-31	Internet	Rosa Sloot	Sloot, R; Borgdorff, MW; de Beer, JL; van Ingen, J; Supply, P; van Soolingen, D	Department of Clinical Epidemiology, Biostatistics and Bioinformatics, Academic Medical Center, University of Amsterdam, Amsterdam, The Netherlands.	journal
	1		China	1				1	0	0	LPW				PubMed	328714	23658680	10.1371/journal.pone.0057660	Genetic diversity of Mycobacterium tuberculosis isolates from Inner Mongolia, China	Tuberculosis (TB) is a serious public health problem in China, and within China, Inner Mongolia has a high prevalence area of TB. Though studies on the genetic diversity of Mycobacterium tuberculosis (MTB) have been reported in many provinces, there are no such studies to date in Inner Mongolia. In this study, we investigated the genetic diversity of MTB in Inner Mongolia.In this study, we analyz…	eng	PloS one	PLoS One	101285081	2013			8	5	e57660	Internet	Qin Yu	Yu, Q; Su, Y; Lu, B; Ma, Y; Zhao, X; Yang, X; Dong, H; Liu, Y; Lian, L; Wan, L; Wu, Y; Wan, K	National Institute for Communicable Disease Control and Prevention, Chinese Center for Disease Control and Prevention/State Key Laboratory for Infectious Disease Prevention and Control, Beijing, PR China.	journal
hospital	1		Ethiopia	1				1	0	0	LPW				PubMed	329861	23827032	10.5588/ijtld.12.0854	Strain diversity of mycobacteria isolated from pulmonary tuberculosis patients at Debre Birhan Hospital, Ethiopia	Ethiopia ranks seventh in the list of 22 high tuberculosis (TB) burden countries, with an incidence rate of 379 cases per 100,000 population for TB all forms. However, information on the genomic diversity of Mycobacterium tuberculosis in Ethiopia is limited.To investigate the molecular characteristics of M. tuberculosis strains implicated in pulmonary TB in the study area.A cross-sectional study …	eng	The international journal of tuberculosis and lung disease : the official journal of the International Union against Tuberculosis and Lung Disease	Int J Tuberc Lung Dis	9706389	2013	Aug		17	8	1076-81	Internet	L Garedew	Garedew, L; Mihret, A; Mamo, G; Abebe, T; Firdessa, R; Bekele, Y; Ameni, G	Faculty of Veterinary Medicine, University of Gondar, Gondar, Ethiopia. legesse_lg@yahoo.com	journal
hospital	1		Phillipines	1				1	0	0	LPW				PubMed	328529	23898494		A molecular epidemiologic analysis of Mycobacterium tuberculosis among Filipino patients in a suburban community in the Philippines	The Philippines is designated as one of the high tuberculosis (TB) burden countries by WHO. We conducted a molecular epidemiologic analysis of Mycobacterium tuberculosis isolates collected from patients consulting at the health clinics in the city of Santa Rosa, Laguna, a suburban community in the Philippines.A total of 116 M. tuberculosis isolates were characterized and genotyped using spoligoty…	eng	Kekkaku : [Tuberculosis]	Kekkaku	422132	2013	Jun		88	6	543-52	Print	Jaime C Montoya	Montoya, JC; Murase, Y; Ang, C; Solon, J; Ohkado, A	Section of Infectious Diseases, Department of Internal Medicine, College of Medicine, University of the Philippines Manila, Manila, Philippines. jmontoya204@gmail.com	journal
	1	covariate data collected	Peru	1				1	0	0	KEW				PubMed	328748	23984854	10.1186/1471-2334-13-397	Genetic variability of Mycobacterium tuberculosis complex in patients with no known risk factors for MDR-TB in the North-Eastern part of Lima, Peru	The aim of this study was to investigate the genetic diversity among Mycobacterium tuberculosis complex circulating in patients with no known risk factors for multi-drug resistant (MDR) tuberculosis (TB) living in a high MDR burden area and analyze the relationship between genotypes, primary drug resistance and age.Samples were collected during January-July 2009. Isolates were tested for drug sus…	eng	BMC infectious diseases	BMC Infect Dis	100968551	2013	Aug		13		397	Internet	Francesca Barletta	Barletta, F; Otero, L; Collantes, J; Asto, B; de Jong, BC; Seas, C; Rigouts, L	Instituto de Medicina Tropical Alexander von Humboldt, Molecular Epidemiology Unit - TB, Universidad Peruana Cayetano Heredia, Lima, Peru. francescabarletta@yahoo.es.	journal
	1		Canada	1				1	0	0	LPW				PubMed	328641	24025385	10.5588/ijtld.13.0145	Epidemiological evaluation of spatiotemporal and genotypic clustering of Mycobacterium tuberculosis in Ontario, Canada	In Canada, tuberculosis (TB) rates are at a historic low, with the remaining risk concentrated in a few vulnerable population subgroups.To describe the epidemiology of TB in the Canadian province of Ontario and to characterise risk factors associated with transmission events, identified using genetic typing techniques.Retrospective analysis of 2186 culture-positive TB cases between August 2007 an…	eng	The international journal of tuberculosis and lung disease : the official journal of the International Union against Tuberculosis and Lung Disease	Int J Tuberc Lung Dis	9706389	2013	Oct		17	10	1322-7	Internet	A R Tuite	Tuite, AR; Guthrie, JL; Alexander, DC; Whelan, MS; Lee, B; Lam, K; Ma, J; Fisman, DN; Jamieson, FB	Dalla Lana School of Public Health, University of Toronto, Toronto, Ontario, Canada; Institute of Medical Science, University of Toronto, Toronto, Ontario, Canada.	journal
	1		Cameroon	1				1	0	0	LPW				PubMed	329691	24028382	10.1186/1471-2334-13-431	Mycobacterium tuberculosis is the causative agent of tuberculosis in the southern ecological zones of Cameroon, as shown by genetic analysis	Tuberculosis (TB) is a major cause of mortality and suffering worldwide, with over 95% of TB deaths occurring in low- and middle-income countries. In recent years, molecular typing methods have been widely used in epidemiological studies to aid the control of TB, but this usage has not been the case with many African countries, including Cameroon. The aims of the present investigation were to ide…	eng	BMC infectious diseases	BMC Infect Dis	100968551	2013	Sep		13		431	Internet	Jean Paul Assam Assam	Assam Assam, JP; Penlap Beng, V; Cho-Ngwa, F; Toukam, M; Ngoh, AA; Kitavi, M; Nzuki, I; Nyonka, JN; Tata, E; Tedom, JC; Skilton, RA; Pelle, R; Titanji, VP	Biotechnology Unit, Faculty of Science, University of Buea, P,O, Box 63, Buea, Cameroon. vpk.titanji@yahoo.com.	journal
	1	Extracted - table has typos and does not add up to sample size, unclear where error is but total is off by 2	Mexico	1				1	0	0	LPW				PubMed	328557	24037193	10.1590/0074-0276108062013007	Characterisation of pks15/1 in clinical isolates of Mycobacterium tuberculosis from Mexico	Tuberculosis (TB) is an infectocontagious respiratory disease caused by members of the Mycobacterium tuberculosis complex. A 7 base pair (bp) deletion in the locus polyketide synthase (pks)15/1 is described as polymorphic among members of the M. tuberculosis complex, enabling the identification of Euro-American, Indo-Oceanic and Asian lineages. The aim of this study was to characterise this locus…	eng	Memorias do Instituto Oswaldo Cruz	Mem Inst Oswaldo Cruz	7502619	2013	Sep		108	6	718-23	Internet	Roberto Zenteno-Cuevas	Zenteno-Cuevas, R; Silva-Hernández, FX; Mendoza-Damián, F; Ramírez-Hernández, MD; Vázquez-Medina, K; Widrobo-García, L; Cuellar-Sanchez, A; Muñíz-Salazar, R; Enciso-Moreno, L; Pérez-Navarro, LM; Enciso-Moreno, JA	Instituto de Salud Pública, Universidad Veracruzana, Veracruz, México.	journal
	1		Brazil	1				1	1	0	KEW				PubMed	328659	24098337	10.1371/journal.pone.0074517	Extrapulmonary tuberculosis: Mycobacterium tuberculosis strains and host risk factors in a large urban setting in Brazil	Factors related to the development of extrapulmonary forms of tuberculosis (EPTB) are still poorly understood, particularly in high-endemic countries like Brazil. The objective of the paper is to determine host and Mycobacterium tuberculosis (MTB) strain-related factors associated with the development of EPTB in Espírito Santo state, Brazil.We conducted a retrospective laboratory-based surveillan…	eng	PloS one	PLoS One	101285081	2013			8	10	e74517	Internet	Teresa Gomes	Gomes, T; Vinhas, SA; Reis-Santos, B; Palaci, M; Peres, RL; Aguiar, PP; Ribeiro, FK; Marques, HS; Dettoni, Vdo V; Johnson, JL; Riley, LW; Maciel, EL	Graduate Program in Infectious Diseases, Federal University of Espírito Santo, Vitória, Brazil.	journal
	1		Finland	1				1	0	0	KEW				PubMed	329351	24386443	10.1371/journal.pone.0085027	Molecular epidemiology of tuberculosis in Finland, 2008-2011	In industrialized countries the majority of tuberculosis (TB) cases are linked to immigration. In Finland, most cases are still Finnish born but the number of foreign born cases is steadily increasing. In this 4-year population based study, the TB situation in Finland was characterized by a genotypic analysis of Mycobacterium tuberculosis isolates. A total of 1048 M. tuberculosis isolates (repres…	eng	PloS one	PLoS One	101285081	2013			8	12	e85027	Internet	Pieter Willem Smit	Smit, PW; Haanperä, M; Rantala, P; Couvin, D; Lyytikäinen, O; Rastogi, N; Ruutu, P; Soini, H	European Public Health Microbiology Training Programme, (EUPHEM), European Centre for Disease Prevention and Control (ECDC), Stockholm, Sweden ; Department of Infectious Disease Surveillance and Control, National Institute for Health and Welfare, Helsinki, Finland.	journal
hospital	1	back calculate strains?	Taiwan	1				1	0	0	LPW				PubMed	328546	22036788	10.1016/j.meegid.2011.10.001	Association of Mycobacterium tuberculosis genotypes and clinical and epidemiological features - a multi-center study in Taiwan	Genotypes of Mycobacterium tuberculosis (MTB) are related to the geographic origin of the patients and population migration. The relationship between genotypes of MTB and clinical presentations has mainly focused on transmission of multi-drug resistant MTB strain in population. This study aimed to investigate the molecular epidemiology and dynamic change of MTB genotypes in Taiwan, and their asso…	eng	Infection, genetics and evolution : journal of molecular epidemiology and evolutionary genetics in infectious diseases	Infect Genet Evol	101084138	2012	Jan		12	1	28-37	Internet	Shiang-Fen Huang	Huang, SF; Su, WJ; Dou, HY; Feng, JY; Lee, YC; Huang, RM; Lin, CH; Hwang, JJ; Lee, JJ; Yu, MC	Department of Chest Medicine, Taipei Veterans General Hospital, Taipei, Taiwan. sfhuang.dr@gmail.com	journal
	1		Russia	1				1	0	0	KEW				PubMed	329409	22160887	10.1007/s10096-011-1497-2	Molecular genetic analysis of Mycobacterium tuberculosis strains spread in different patient groups in St Petersburg, Russia	Molecular epidemiological features of Mycobacterium tuberculosis strains among different patient groups in Russia have not been studied well. The aim of our study was to compare the genotypes of M. tuberculosis strains circulating among tuberculosis (TB) patients from different groups: homeless, human immunodeficiency virus (HIV)-infected, prisoners, and the general population of St. Petersburg c…	eng	European journal of clinical microbiology & infectious diseases : official publication of the European Society of Clinical Microbiology	Eur J Clin Microbiol Infect Dis	8804297	2012	Aug		31	8	1753-7	Internet	E Chernyaeva	Chernyaeva, E; Dobrynin, P; Pestova, N; Matveeva, N; Zhemkov, V; Kozlov, A	The Biomedical Center, 8, Vyborgskaya St., St. Petersburg, 194044, Russia. echernya@gmail.com	journal
	1		USA	1				1	0	0	LPW				PubMed	329733	22198989	10.1093/cid/cir788	Relationship between Mycobacterium tuberculosis phylogenetic lineage and clinical site of tuberculosis	Genotyping of Mycobacterium tuberculosis has revealed 4 major phylogenetic lineages with differential distribution worldwide. It is not clear whether different lineages are associated with different sites of infection (eg, pulmonary tuberculosis versus extrapulmonary tuberculosis). We sought to determine whether M. tuberculosis lineage is associated with the site of tuberculosis disease.We conduc…	eng	Clinical infectious diseases : an official publication of the Infectious Diseases Society of America	Clin Infect Dis	9203213	2012	Jan		54	2	211-9	Internet	Eleanor S Click	Click, ES; Moonan, PK; Winston, CA; Cowan, LS; Oeltmann, JE	Epidemic Intelligence Service , Division of Tuberculosis Elimination, Centers for Disease Control and Prevention, Atlanta, Georgia 30333, USA. eoc9@cdc.gov	journal
hospital	1		Pakistan	1				1	0	0	LPW				PubMed	328560	22365136	10.1016/j.ijid.2011.12.015	Characterizing Mycobacterium tuberculosis isolates from Karachi, Pakistan: drug resistance and genotypes	To study the prevalence, risk factors, and genotypes of drug-resistant Mycobacterium tuberculosis in Karachi.Pulmonary tuberculosis (TB) patients were recruited in a cross-sectional study (2006-2009). Drug susceptibility testing was performed for culture-positive cases (n=1004). Factors associated with drug resistance were evaluated using logistic regression analysis. Strains were typed using spo…	eng	International journal of infectious diseases : IJID : official publication of the International Society for Infectious Diseases	Int J Infect Dis	9610933	2012	Apr		16	4	e303-9	Internet	Afsheen Ayaz	Ayaz, A; Hasan, Z; Jafri, S; Inayat, R; Mangi, R; Channa, AA; Malik, FR; Ali, A; Rafiq, Y; Hasan, R	Department of Pathology and Microbiology, Aga Khan University, Stadium Road, PO Box 3500, Karachi 74800, Pakistan.	journal
hospital	1		USA	1				1	1	0	LPW				PubMed	329899	22377473	10.3201/eid1803.111107	Using genotyping and geospatial scanning to estimate recent mycobacterium tuberculosis transmission, United States	To determine the proportion of reported tuberculosis (TB) cases due to recent transmission in the United States, we conducted a cross-sectional study to examine culture-positive TB cases with complete genotype results (spoligotyping and 12-locus mycobacterial interspersed repetitive unit-variable-number tandem repeat typing) reported during January 2005-December 2009. Recently transmitted cases w…	eng	Emerging infectious diseases	Emerg Infect Dis	9508155	2012	Mar		18	3	458-65	Internet	Patrick K Moonan	Moonan, PK; Ghosh, S; Oeltmann, JE; Kammerer, JS; Cowan, LS; Navin, TR	US Centers for Disease Control and Prevention, Atlanta, GA 30333, USA. pmoonan@cdc.gov	journal
	1		China	1				1	0	0	LPW				PubMed	329855	22412962	10.1371/journal.pone.0032976	Spoligotyping and drug resistance analysis of Mycobacterium tuberculosis strains from national survey in China	Tuberculosis (TB), caused by Mycobacterium tuberculosis complex (MTBC), is one of the major causes of death in the world today. Although China has the second largest global case rate of tuberculosis, a systematic study of TB prevalence in China has not been completed. From 2006 to 2007, the base line surveillance of tuberculosis was carried out by Ministry of Health, and more than 4000 representa…	eng	PloS one	PLoS One	101285081	2012			7	3	e32976	Internet	Yu Pang	Pang, Y; Zhou, Y; Zhao, B; Liu, G; Jiang, G; Xia, H; Song, Y; Shang, Y; Wang, S; Zhao, YL	Chinese Center for Disease Control and Prevention, Beijing, China.	journal
	1		China	1				1	0	0	LPW				PubMed	328715	22479472	10.1371/journal.pone.0033904	Genetic diversity of Mycobacterium tuberculosis isolates from Tibetans in Tibet, China	Tuberculosis (TB) is a serious health problem in Tibet where Tibetans are the major ethnic group. Although genotyping of Mycobacterium tuberculosis (M. tuberculosis) isolates is a valuable tool for TB control, our knowledge of population structure of M. tuberculosis circulating in Tibet is limited.In our study, a total of 576 M. tuberculosis isolates from Tibetans in Tibet, China, were analyzed v…	eng	PloS one	PLoS One	101285081	2012			7	3	e33904	Internet	Haiyan Dong	Dong, H; Shi, L; Zhao, X; Sang, B; Lv, B; Liu, Z; Wan, K	State Key Laboratory for Infectious Disease Prevention and Control, National Institute for Communicable Disease Control and Prevention, Chinese Center for Disease Control and Prevention, Changping, Beijing, People's Republic of China.	journal
hospital	1	strain data not in extractable format	Mali	0	1	Received extractable strain data from author		1	0	0	LPW	Requested data from Figure 1 in Excel format	Received data (put in additional sources/Mali)	Include	PubMed	358578	22508197	10.5588/ijtld.11.0397	Molecular strain typing of Mycobacterium tuberculosis complex in Bamako, Mali	To identify strains of Mycobacterium tuberculosis complex (MTC) circulating in Bamako and to examine the relationship between the strains and their drug susceptibility profiles.Between 2006 and 2010, we conducted a cross-sectional study using spoligotyping to identify strains of MTC recovered from 126 tuberculosis (TB) patients under treatment in Bamako, Mali.Three members of the MTC were isolate…	eng	The international journal of tuberculosis and lung disease : the official journal of the International Union against Tuberculosis and Lung Disease	Int J Tuberc Lung Dis	9706389	2012	Jul		16	7	911-6	Internet	B Traore	Traore, B; Diarra, B; Dembele, BP; Somboro, AM; Hammond, AS; Siddiqui, S; Maiga, M; Kone, B; Sarro, YS; Washington, J; Parta, M; Coulibaly, N; M'baye, O; Diallo, S; Koita, O; Tounkara, A; Polis, MA	Project SEREFO-NIAID (Centre de Recherche et de Formation sur VIH/Sida et Tuberculose-Institut National des Maladies Infectieuses et Allergiques)/University of Bamako Research Collaboration on HIV-TB, Bamako, Mali.	journal
	1	recruitment of cohort study method unclear	Papua New Guinea	0	1	Samples were collected from all pulmonary TB cases		1	0	0	LPW				PubMed	342555	22710686	10.5588/ijtld.11.0779	Genetic diversity of Mycobacterium tuberculosis in Madang, Papua New Guinea	Madang and surroundings, Papua New Guinea (PNG).To characterise the genetic diversity and drug susceptibility of Mycobacterium tuberculosis isolates collected in Madang and surroundings.M. tuberculosis was isolated from sputum samples from active pulmonary tuberculosis cases. Drug resistance profiles were obtained by drug susceptibility testing. M. tuberculosis lineages were identified by single …	eng	The international journal of tuberculosis and lung disease : the official journal of the International Union against Tuberculosis and Lung Disease	Int J Tuberc Lung Dis	9706389	2012	Aug		16	8	1100-7	Internet	M Ballif	Ballif, M; Harino, P; Ley, S; Carter, R; Coulter, C; Niemann, S; Borrell, S; Fenner, L; Siba, P; Phuanukoonnon, S; Gagneux, S; Beck, HP	Swiss Tropical and Public Health Institute, Basel, Switzerland.	journal
	1		Russia	1				1	1	0	KEW				PubMed	329692	22844457	10.1371/journal.pone.0041318	Mycobacterium tuberculosis population in northwestern Russia: an update from Russian-EU/Latvian border region	This study aimed to characterize the population structure of Mycobacterium tuberculosis in Pskov oblast in northwestern Russia, to view it in the geographical context, to compare drug resistance properties across major genetic families. Ninety M. tuberculosis strains from tuberculosis (TB) patients, permanent residents in Pskov oblast were subjected to LAM-specific IS6110-PCR and spoligotyping, f…	eng	PloS one	PLoS One	101285081	2012			7	7	e41318	Internet	Igor Mokrousov	Mokrousov, I; Vyazovaya, A; Otten, T; Zhuravlev, V; Pavlova, E; Tarashkevich, L; Krishevich, V; Vishnevsky, B; Narvskaya, O	Laboratory of Molecular Microbiology, St. Petersburg Pasteur Institute, St. Petersburg, Russia. imokrousov@mail.ru	journal
	1		Vietnam	1				1	1	0	JRL				PubMed	328853	22912700	10.1371/journal.pone.0042323	Increased transmission of Mycobacterium tuberculosis Beijing genotype strains associated with resistance to streptomycin: a population-based study	Studies have shown that the Mycobacterium tuberculosis Beijing genotype is an emerging pathogen that is frequently associated with drug resistance. This suggests that drug resistant Beijing strains have a relatively high transmission fitness compared to other drug-resistant strains.We studied the relative transmission fitness of the Beijing genotype in relation to anti-tuberculosis drug resistanc…	eng	PloS one	PLoS One	101285081	2012			7	8	e42323	Internet	Tran N Buu	Buu, TN; van Soolingen, D; Huyen, MN; Lan, NT; Quy, HT; Tiemersma, EW; Kremer, K; Borgdorff, MW; Cobelens, FG	Tuberculosis Control Department, Pham Ngoc Thach Hospital, Ho Chi Minh City, Vietnam.	journal
	1		Taiwan	1				1	0	0	JRL				PubMed	329905	22937008	10.1371/journal.pone.0043018	Clonal expansion of both modern and ancient genotypes of Mycobacterium tuberculosis in southern Taiwan	We present the first comprehensive analysis of Mycobacterium tuberculosis isolates circulating in the Kaohsiung region of southern Taiwan. The major spoligotypes found in the 224 isolates studied were Beijing lineages (n = 97; 43.3%), EAI lineages (n = 72; 32.1%) and Haarlem lineages (n = 18; 8.0%). By 24 MIRU-VNTR typing, 174 patterns were identified, including 24 clusters of 74 isolates and 150…	eng	PloS one	PLoS One	101285081	2012			7	8	e43018	Internet	Jia-Ru Chang	Chang, JR; Chen, YY; Huang, TS; Huang, WF; Kuo, SC; Tseng, FC; Su, IJ; Lin, CH; Chen, YS; Sun, JR; Chiueh, TS; Dou, HY	National Institute of Infectious Diseases and Vaccinology, National Health Research Institutes, Zhunan, Miaoli, Taiwan.	journal
hospital	1		USA	1				1	1	0	LPW				PubMed	328665	22982156	10.1016/j.meegid.2012.08.022	Factors associated with genotype clustering of Mycobacterium tuberculosis isolates in an ethnically diverse region of southern California, United States	Mycobacterium tuberculosis (Mtb) isolates with identical genotypes, found in different patients, are most likely the result of recent transmission. Mtb strains with closely related genotypes, called clonal complexes, are most likely derived from one another. We examined Mtb genotypes from southern California TB patients from 2005 through 2008 to complete the first comprehensive molecular epidemio…	eng	Infection, genetics and evolution : journal of molecular epidemiology and evolutionary genetics in infectious diseases	Infect Genet Evol	101084138	2012	Dec		12	8	1917-25	Internet	Timothy C Rodwell	Rodwell, TC; Kapasi, AJ; Barnes, RF; Moser, KS	University of California San Diego School of Medicine, 9500 Gilman Drive, MC 0507, La Jolla, CA 92093-0507, USA. trodwell@ucsd.edu	journal
	1		Vietnam	1				1	0	0	LPW				PubMed	328840	23029091	10.1371/journal.pone.0045553	High prevalence of Beijing and EAI4-VNM genotypes among M tuberculosis isolates in northern Vietnam: sampling effect, rural and urban disparities	A total of 221 isolates of M. tuberculosis were sampled from hospitals and the general population in the northern plain of Vietnam, one of the most populated region of the country. Genotypic composition and diversity were characterized, and we investigated how they are affected by sampling (hospital vs. general population), correcting for potential confounding effects (location, age and gender of…	eng	PloS one	PLoS One	101285081	2012			7	9	e45553	Internet	Van Anh Thi Nguyen	Nguyen, VA; Choisy, M; Nguyen, DH; Tran, TH; Pham, KL; Thi Dinh, PT; Philippe, J; Nguyen, TS; Ho, ML; Van Tran, S; Bañuls, AL; Dang, DA	Department of Bacteriology, National Institute of Hygiene and Epidemiology, Hanoi, Vietnam. vananhtdt@gmail.com	journal
	1	data reported in pie charts without numbers	Morocco	1				1	0	0	LPW				PubMed	329870	23077552	10.1371/journal.pone.0047113	The genotypic population structure of Mycobacterium tuberculosis complex from Moroccan patients reveals a predominance of Euro-American lineages	Tuberculosis (TB) remains a major health problem in Morocco. Characterization of circulating Mycobacterium tuberculosis genotypic lineages, important to understand the dynamic of the disease, was hereby addressed for the first time at a national level.Spoligotyping was performed on a panel of 592 M. tuberculosis complex strains covering a 2-year period (2004-2006). It identified 129 patterns: 105…	eng	PloS one	PLoS One	101285081	2012			7	10	e47113	Internet	Ouafae Lahlou	Lahlou, O; Millet, J; Chaoui, I; Sabouni, R; Filali-Maltouf, A; Akrim, M; El Mzibri, M; Rastogi, N; El Aouad, R	National Tuberculosis Reference Laboratory, National Institute of Hygiene, Rabat, Morocco.	journal
	1		China	1				1	0	0	LPW				PubMed	329532	23226754	10.3892/etm.2012.699	Molecular typing of Mycobacterium tuberculosis isolates circulating in Henan, central China	The aim of this study was to characterize the genotypes of Mycobacterium tuberculosis (MT) in isolates obtained from Henan, China, and to study the distribution features of Beijing strains in Henan. A total of 443 MT strains isolated in Henan Province were tested for susceptibility to isonicotinylhydrazide (INH), rifampicin (RFP), ethambutol (EMB) and streptomycin (SM), and genotyped by spoligoty…	eng	Experimental and therapeutic medicine	Exp Ther Med	101531947	2012	Nov		4	5	949-953	Print	Yuling Zhao	Zhao, Y; Li, H; Xing, J; Yang, H; Ma, X; Xu, J; Shi, J; Yan, G	Center for Disease Control and Prevention of Henan Province, Zhengzhou, Henan 450016, P.R. China.	journal
	1		Ethiopia	1				1	0	0	LPW				PubMed	328602	23227330	10.1155/2012/892079	Diversity of Mycobacterium tuberculosis isolates from new pulmonary tuberculosis cases in Addis Ababa, Ethiopia	Understanding the genetic diversity of Mycobacterium tuberculosis is needed for a better understanding of the epidemiology of TB and could have implications for the development of new diagnostics, drugs, and vaccines. M. tuberculosis isolates were characterized using spoligotyping and were compared with the SpoIDB4 database of the Pasteur Institute of Guadeloupe. A total of 53 different patterns …	eng	Tuberculosis research and treatment	Tuberc Res Treat	101576351	2012			2012		892079	Internet	Adane Mihret	Mihret, A; Bekele, Y; Loxton, AG; Jordan, AM; Yamuah, L; Aseffa, A; Howe, R; Walzl, G	Immunology Unit, Armauer Hansen Research Institute, P.O. Box 1005, Addis Ababa, Ethiopia.	journal
	1		China	1				1	0	0	LPW				PubMed	328713	23259861	10.1186/1471-2334-12-372	Genetic diversity of Mycobacterium tuberculosis isolates from Beijing, China assessed by Spoligotyping, LSPs and VNTR profiles	Tuberculosis is one of the most infectious diseases in the world. Molecular typing methods such as spoligotyping, and VNTR (variable number tandem repeats), IS6110 in the NTF region and LSP (large sequence polymorphisms) analysis are generally useful tools for the resolution of various issues related to the classical epidemiology of Mycobacterium tuberculosis (M. tuberculosis).To determine the tr…	eng	BMC infectious diseases	BMC Infect Dis	100968551	2012	Dec		12		372	Internet	Bing Lu	Lu, B; Zhao, P; Liu, B; Dong, H; Yu, Q; Zhao, X; Wan, K	State Key Laboratory for Infectious Diseases Prevention and Control, National Institute for Communicable Disease Control and Prevention & National Tuberculosis Reference Laboratory, Chinese Center for Disease Control and Prevention, Beijing 102206, PR China.	journal
	1		Iraq	1				1	1	0	LPW				PubMed	328668	26786944	10.1016/j.ijmyco.2012.01.003	First insight into the genetic diversity of Mycobacterium tuberculosis strains from patients in Duhok, Iraq	The aim of this study was to evaluate the genotypic diversity of Mycobacterium tuberculosis strains using IS6110 RFLP, spoligotyping and MIRU-VNTR typing.Between June 2008 and June 2009, all smear positive pulmonary specimens were collected prospectively at the national tuberculosis program (NTP) center of Duhok province. The specimens were processed for culture by modified Petroff's method and w…	eng	International journal of mycobacteriology	Int J Mycobacteriol	101615660	2012	Mar		1	1	13-20	Print	Muayad A Merza	Merza, MA; Salih, AM	Azadi Teaching Hospital, College of Medicine, University of Duhok, Duhok, Kurdistan, Iraq. Electronic address: muayadfaily@yahoo.com.	journal
	1		Sweden	1				1	0	0	LPW				PubMed	328844	20825440	10.1111/j.1469-0691.2010.03358.x	Impact of immigration on tuberculosis epidemiology in a low-incidence country	Mycobacterium tuberculosis strains from 349 patients were isolated in western Sweden during the years 2001-2005. Only 26% of the tuberculosis (TB) patients were born in Sweden. All the others were born in any of 42 different countries; 17% in other European countries, 28% in Africa, 16% in Asia, 11% in the Middle East, and 2% in South America. The mean age of the Swedish-born patients was 67 year…	eng	Clinical microbiology and infection : the official publication of the European Society of Clinical Microbiology and Infectious Diseases	Clin Microbiol Infect	9516420	2011	Jun		17	6	881-7	Internet	E Svensson	Svensson, E; Millet, J; Lindqvist, A; Olsson, M; Ridell, M; Rastogi, N; ,	Institute for Biomedicine, University of Gothenburg, Gothenburg, Sweden. erik.svensson@vgregion.se	journal
	1		Russia	1				1	0	0	KEW				PubMed	329526	20941520	10.1007/s10096-010-1067-z	Molecular typing of Mycobacterium tuberculosis circulated in Moscow, Russian Federation	The present study investigates epidemiological diversity and multidrug resistance spreading among Mycobacterium tuberculosis strains circulating in Moscow, Russian Federation. Among 115 M. tuberculosis strains selected randomly from the sputum of epidemiologically unrelated tuberculosis (TB) patients, multidrug-resistant (MDR) strains predominated. Mutations in the RRDR of the rpoB gene were dete…	eng	European journal of clinical microbiology & infectious diseases : official publication of the European Society of Clinical Microbiology	Eur J Clin Microbiol Infect Dis	8804297	2011	Feb		30	2	181-91	Internet	M V Afanas'ev	Afanas'ev, MV; Ikryannikova, LN; Il'ina, EN; Kuz'min, AV; Larionova, EE; Smirnova, TG; Chernousova, LN; Govorun, VM	Research Institute of Physical-Chemical Medicine of the Ministry of Public Health of the Russian Federation, Malaya Pirogovskaya st., 1a, 119435, Moscow, Russia. afanasev_max@mail.ru	journal
	1		Mexico	1				1	0	0	JRL				PubMed	328576	21197077	10.1155/2011/408375	Clustering of Mycobacterium tuberculosis cases in Acapulco: Spoligotyping and risk factors	Recurrence and reinfection of tuberculosis have quite different implications for prevention. We identified 267 spoligotypes of Mycobacterium tuberculosis from consecutive tuberculosis patients in Acapulco, Mexico, to assess the level of clustering and risk factors for clustered strains. Point cluster analysis examined spatial clustering. Risk analysis relied on the Mantel Haenszel procedure to ex…	eng	Clinical & developmental immunology	Clin Dev Immunol	101183692	2011			2011		408375	Internet	Elizabeth Nava-Aguilera	Nava-Aguilera, E; López-Vidal, Y; Harris, E; Morales-Pérez, A; Mitchell, S; Flores-Moreno, M; Villegas-Arrizón, A; Legorreta-Soberanis, J; Ledogar, R; Andersson, N	Centro de Investigación de Enfermedades Tropicales, Universidad Autónoma de Guerrero, Calle Pino S/N, Colonia El Roble, 39640 Acapulco, Guerrero, Mexico. enava@ciet.org	journal
	1		Russia	1				1	1	0	KEW				PubMed	328662	21394425	10.1007/s10096-011-1200-7	Extremely high prevalence of multidrug resistant tuberculosis in Murmansk, Russia: a population-based study	Drug resistance and molecular epidemiology of tuberculosis (TB) in the Murmansk region was investigated in a 2-year, population-based surveillance of the civilian population. During 2003 and 2004, isolates from all culture-positive cases were collected (n = 1,226). Prevalence of multi-drug resistance (MDR) was extremely high, as 114 out of 439 new cases (26.0%), and 574 out of 787 previously trea…	eng	European journal of clinical microbiology & infectious diseases : official publication of the European Society of Clinical Microbiology	Eur J Clin Microbiol Infect Dis	8804297	2011	Sep		30	9	1119-26	Internet	J Mäkinen	Mäkinen, J; Marjamäki, M; Haanperä-Heikkinen, M; Marttila, H; Endourova, LB; Presnova, SE; Mathys, V; Bifani, P; Ruohonen, R; Viljanen, MK; Soini, H	Antimicrobial Resistance Unit, Mycobacterial Laboratory, National Institute for Health and Welfare, Kiinamyllynkatu 13, 20520 Turku, Finland.	journal
hospital	1	Did not report dates for data collection	Russia	1				1	0	0	JRL				PubMed	328838	21436372	10.1099/jmm.0.027995-0	Highest prevalence of the Mycobacterium tuberculosis Beijing genotype isolates in patients newly diagnosed with tuberculosis in the Novosibirsk oblast, Russian Federation	In order to assess the genetic diversity of Mycobacterium tuberculosis in the Novosibirsk Region and determine profiles of resistance, 106 M. tuberculosis isolates were analysed. Fifty (47?%) isolates were identified using variable number tandem repeat typing as being in the Beijing family, of which eight (16?%) were type M2 isolates with the genetic profile 233325153533424 and eight (16?%) were …	eng	Journal of medical microbiology	J Med Microbiol	224131	2011	Jul		60	Pt 7	1003-9	Internet	M A Dymova	Dymova, MA; Kinsht, VN; Cherednichenko, AG; Khrapov, EA; Svistelnik, AV; Filipenko, ML	Institute of Chemical Biology and Fundamental Medicine, Siberian Branch of the Russian Academy of Sciences, Novosibirsk, Russian Federation. maya.a.rot@gmail.com	journal
	1		Ukraine	1				1	1	0	KEW				PubMed	328821	21439097	10.1186/1471-2334-11-77	Genetic variation of Mycobacterium tuberculosis circulating in Kharkiv Oblast, Ukraine	A persistent increase of tuberculosis cases has recently been noted in the Ukraine. The reported incidence of drug-resistant isolates of M. tuberculosis is growing steadily; however, data on the genetic variation of isolates of M. tuberculosis circulating in northern Ukraine and on the spectrum and frequency of occurrence of mutations determining resistance to the principal anti-tuberculosis drug…	eng	BMC infectious diseases	BMC Infect Dis	100968551	2011	Mar		11		77	Internet	Maya A Dymova	Dymova, MA; Liashenko, OO; Poteiko, PI; Krutko, VS; Khrapov, EA; Filipenko, ML	Institute of Chemical Biology and Basic Medicine, Siberian Branch, Russian Academy of Sciences, Novosibirsk, Russian Federation, Russia. maya.a.rot@gmail.com	journal
	1		India	1				1	0	0	LPW				PubMed	328637	21453793	10.1016/j.meegid.2011.03.011	Drug resistance among different genotypes of Mycobacterium tuberculosis isolated from patients from Tiruvallur, South India	India continues to have the highest tuberculosis incidence, accounting for one fifth of the global incidence and 2/3rd of the cases in south East Asia. The TB burden is also augmented by multi drug resistance and HIV. Although inadequate and inappropriate treatment is responsible for drug resistance, pathogen's genetic background may also play a role. The aim of this study was to understand the d…	eng	Infection, genetics and evolution : journal of molecular epidemiology and evolutionary genetics in infectious diseases	Infect Genet Evol	101084138	2011	Jul		11	5	980-6	Internet	Sivakumar Shanmugam	Shanmugam, S; Selvakumar, N; Narayanan, S	Department of Immunology, Tuberculosis Research Centre, Indian Council of Medical Research, Mayor VR Ramanathan Road, Chetpet, Chennai 600031, Tamilnadu, India.	journal
	1	Multiple studies combined, data not available by study	Guinea Bisseau	0	1	Received clarification of methods from author: Study C is eligible therefore we can extract		1	0	0	LPW				PubMed	358574	21533101	10.1371/journal.pone.0018601	The Guinea-Bissau family of Mycobacterium tuberculosis complex revisited	The Guinea-Bissau family of strains is a unique group of the Mycobacterium tuberculosis complex that, although genotypically closely related, phenotypically demonstrates considerable heterogeneity. We have investigated 414 M. tuberculosis complex strains collected in Guinea-Bissau between 1989 and 2008 in order to further characterize the Guinea-Bissau family of strains. To determine the strain l…	eng	PloS one	PLoS One	101285081	2011	Apr		6	4	e18601	Internet	Ramona Groenheit	Groenheit, R; Ghebremichael, S; Svensson, J; Rabna, P; Colombatti, R; Riccardi, F; Couvin, D; Hill, V; Rastogi, N; Koivula, T; Källenius, G	Department of Preparedness, Swedish Institute for Infectious Disease Control, Solna, Sweden.	journal
	1		China	1				1	0	0	LPW				PubMed	328834	21575300	10.5588/ijtld.10.0403	Genotyping and drug resistance patterns of Mycobacterium tuberculosis strains in five provinces of China	To evaluate the distribution of the Mycobacterium tuberculosis Beijing genotype and the association of the genotype with drug-resistant M. tuberculosis strains in five provinces in China.M. tuberculosis strains (n = 158) isolated from five provinces of China were subjected to insertion sequence 6110 restriction fragment length polymorphism (RFLP), spoligotyping and mycobacterial interspersed repe…	eng	The international journal of tuberculosis and lung disease : the official journal of the International Union against Tuberculosis and Lung Disease	Int J Tuberc Lung Dis	9706389	2011	Jun		15	6	789-94	Internet	Y-L Guo	Guo, YL; Liu, Y; Wang, SM; Li, CY; Jiang, GL; Shi, GL; Song, CX	Beijing Tuberculosis and Thoracic Tumour Research Institute, Beijing, China.	journal
	1		Brazil	1				1	0	0	LPW				PubMed	329856	21655812		Spoligotyping of clinical Mycobacterium tuberculosis isolates from the state of Minas Gerais, Brazil	We performed spoligotyping on 114 strains of the Mycobacterium tuberculosis (Mtb) complex that had been isolated from patients in Minas Gerais Health Units during 2004. A total of 82/114 (72%) clinical isolates were clustered and 32/114 (28%) were unique. Seven shared types containing nine strains were newly created. A total of nine patterns corresponded to unreported orphan strains, as evaluated…	eng	Memorias do Instituto Oswaldo Cruz	Mem Inst Oswaldo Cruz	7502619	2011	May		106	3	267-73	Internet	Silvana Spíndola de Miranda	Miranda, SS; Carvalho, Wda S; Suffys, PN; Kritski, AL; Oliveira, M; Zarate, N; Zozio, T; Rastogi, N; Gicquel, B	Departamento de Clínica Médica/Pneumologia, Faculdade de Medicina, Universidade Federal de Minas Gerais, Belo Horizonte, MG, Brasil. silvanaspindola@gmail.com	journal
hospital	1		Brazil	1				1	0	0	JRL				PubMed	328559	21801364	10.1186/1756-0500-4-269	Characterization of the genetic diversity of Mycobacterium tuberculosis in São Paulo city, Brazil	Tuberculosis is a major health problem in São Paulo, Brazil, which is the most populous and one of the most cosmopolitan cities in South America. To characterize the genetic diversity of Mycobacterium tuberculosis in the population of this city, the genotyping techniques of spoligotyping and MIRU were applied to 93 isolates collected in two consecutive years from 93 different tuberculosis patient…	eng	BMC research notes	BMC Res Notes	101462768	2011	Jul		4		269	Internet	Natália H Mendes	Mendes, NH; Melo, FA; Santos, AC; Pandolfi, JR; Almeida, EA; Cardoso, RF; Berghs, H; David, S; Johansen, FK; Espanha, LG; Leite, SR; Leite, CQ	Laboratory of Micobacteriology, Faculty of Pharmacy, São Paulo State University at Araraquara, UNESP, Araraquara-Jaú Road Km 01, Araraquara, SP, 14801-902, Brazil. leitecqf@fcfar.unesp.br.	journal
	1		Uganda	1				1	0	0	LPW				PubMed	328589	21835016	10.1186/1756-0500-4-280	Determination of circulating Mycobacterium tuberculosis strains and transmission patterns among pulmonary TB patients in Kawempe municipality, Uganda, using MIRU-VNTR	Mycobacterial interspersed repetitive units - variable number of tandem repeats (MIRU-VNTR) genotyping is a powerful tool for unraveling clonally complex Mycobacterium tuberculosis (MTB) strains and detection of transmission patterns. Using MIRU-VNTR, MTB genotypes and their transmission patterns among patients with new and active pulmonary tuberculosis (PTB) in Kawempe municipality in Kampala, U…	eng	BMC research notes	BMC Res Notes	101462768	2011	Aug		4		280	Internet	Lydia Nabyonga	Nabyonga, L; Kateete, DP; Katabazi, FA; Odong, PR; Whalen, CC; Dickman, KR; Moses, JL	Department of Medical Microbiology, School of Biomedical Sciences, Makerere University College of Health Sciences, Kampala, Uganda. moses.joloba@case.edu.	journal
	1		Sudan	1				1	0	0	KEW				PubMed	329892	21846389	10.1186/1471-2334-11-219	Tuberculosis in Sudan: a study of Mycobacterium tuberculosis strain genotype and susceptibility to anti-tuberculosis drugs	Sudan is a large country with a diverse population and history of civil conflict. Poverty levels are high with a gross national income per capita of less than two thousand dollars. The country has a high burden of tuberculosis (TB) with an estimated 50,000 incident cases during 2009, when the estimated prevalence was 209 cases per 100,000 of the population. Few studies have been undertaken on TB …	eng	BMC infectious diseases	BMC Infect Dis	100968551	2011	Aug		11		219	Internet	Ghada S Sharaf Eldin	Sharaf Eldin, GS; Fadl-Elmula, I; Ali, MS; Ali, AB; Salih, AL; Mallard, K; Bottomley, C; McNerney, R	Al Neelain University, Khartoum, P. O. Box 12702, 11121 Khartoum, Sudan.	journal
	1		India	1				1	0	0	KEW				PubMed	328580	21894371		Comparison of spoligotyping, mycobacterial interspersed repetitive units typing and IS6110-RFLP in a study of genotypic diversity of Mycobacterium tuberculosis in Delhi, North India	The aim of the present study was to compare polymerase chain reaction (PCR)-based methods--spoligotyping and mycobacterial interspersed repetitive units (MIRU) typing--with the gold-standard IS6110 restriction fragment length polymorphism (RFLP) analysis in 101 isolates of Mycobacterium tuberculosis to determine the genetic diversity of M. tuberculosis clinical isolates from Delhi, North India. S…	eng	Memorias do Instituto Oswaldo Cruz	Mem Inst Oswaldo Cruz	7502619	2011	Aug		106	5	524-35	Internet	Mandira Varma-Basil	Varma-Basil, M; Kumar, S; Arora, J; Angrup, A; Zozio, T; Banavaliker, JN; Singh, UB; Rastogi, N; Bose, M	Deptartment of Microbiology, Vallabhbhai Patel Chest Institute, University of Delhi, Delhi, India.	journal
	1		Canada	1				1	0	0	KEW				PubMed	329732	21949856	10.1371/journal.pone.0025075	Reduced transmissibility of East African Indian strains of Mycobacterium tuberculosis	Mycobacterium tuberculosis (MTB) has been classified into 4 main lineages. Some reports have associated certain lineages with particular clinical phenotypes, but there is still insufficient information regarding the clinical and epidemiologic implications of MTB lineage variation.Using large sequence polymorphisms we classified MTB isolates from a population-based study in Montreal, Canada into t…	eng	PloS one	PLoS One	101285081	2011			6	9	e25075	Internet	Amr S Albanna	Albanna, AS; Reed, MB; Kotar, KV; Fallow, A; McIntosh, FA; Behr, MA; Menzies, D	Respiratory Epidemiology and Clinical Research Unit, Montreal Chest Institute, McGill University, Montreal, Quebec, Canada.	journal
	1		Djibouti	1				1	0	0	JRL				PubMed	328839	19694762	10.1111/j.1469-0691.2009.03025.x	Highly structured genetic diversity of the Mycobacterium tuberculosis population in Djibouti	Djibouti is an East African country with a high tuberculosis incidence. This study was conducted over a 2-month period in Djibouti, during which 62 consecutive patients with pulmonary tuberculosis (TB) were included. Genetic characterization of Mycobacterium tuberculosis, using mycobacterial interspersed repetitive-unit variable-number tandem-repeat typing and spoligotyping, was performed. The ge…	eng	Clinical microbiology and infection : the official publication of the European Society of Clinical Microbiology and Infectious Diseases	Clin Microbiol Infect	9516420	2010	Jul		16	7	1023-6	Internet	S Godreuil	Godreuil, S; Renaud, F; Choisy, M; Depina, JJ; Garnotel, E; Morillon, M; Van de Perre, P; Bañuls, AL	Laboratoire de Bactériologie-Virologie Arnaud de Villeneuve, Université Montpellier 1, EA 4205 Transmission, Pathogenèse et Prévention de l'Infection par le VIH, and CHU Montpellier, Montpellier, France. godreuil@yahoo.fr	journal
	1		Mexico	1				1	0	0	JRL				PubMed	329694	19940048	10.1128/JCM.01894-09	Mycobacterium tuberculosis spoligotypes in Monterrey, Mexico	Although tuberculosis is still a public health problem in Mexico, there is little information about the genetic characteristics of the isolates. In the present study, we analyzed by spoligotyping 180 Mycobacterium tuberculosis clinical isolates from the urban area of Monterrey, Mexico, including drug-susceptible and drug-resistant isolates. The spoligotype patterns were compared with those in the…	eng	Journal of clinical microbiology	J Clin Microbiol	7505564	2010	Feb		48	2	448-55	Internet	Carmen A Molina-Torres	Molina-Torres, CA; Moreno-Torres, E; Ocampo-Candiani, J; Rendon, A; Blackwood, K; Kremer, K; Rastogi, N; Welsh, O; Vera-Cabrera, L	Servicio de Dermatología, Hospital Universitario José E. González, Madero y Gonzalitos, Col. Mitras Centro, Monterrey, N.L. CP 64460 Mexico.	journal
hospital	1		South Korea	1				1	0	0	JRL				PubMed	328712	20018816	10.1128/JCM.02167-09	Genetic diversity of Mycobacterium tuberculosis isolates from a tertiary care tuberculosis hospital in South Korea	Tuberculosis (TB) remains an immense public health problem in the Republic of Korea despite a more than fivefold decrease in the prevalence of the disease over the last 3 decades. The rise in drug-resistant TB has compounded the situation. We analyzed 208 clinical isolates of M. tuberculosis from the National Masan Tuberculosis Hospital by spoligotyping, IS6110 restriction fragment length polymor…	eng	Journal of clinical microbiology	J Clin Microbiol	7505564	2010	Feb		48	2	387-94	Internet	Isdore Chola Shamputa	Shamputa, IC; Lee, J; Allix-Béguec, C; Cho, EJ; Lee, JI; Rajan, V; Lee, EG; Min, JH; Carroll, MW; Goldfeder, LC; Kim, JH; Kang, HS; Hwang, S; Eum, SY; Park, SK; Lee, H; Supply, P; Cho, SN; Via, LE; Barry, CE	Tuberculosis Research Section, Laboratory of Clinical Infectious Disease, National Institute of Allergy and Infectious Diseases, National Institutes of Health, Bethesda, Maryland 20892, USA.	journal
	1	only extracted native-born samples	Italy	1				1	0	0	JRL				PubMed	328846	20041892	10.1111/j.1469-0691.2009.03149.x	Impact of immigration on tuberculosis in a low-incidence area of Italy: a molecular epidemiological approach	The effects that immigration might have on the epidemiology of tuberculosis (TB) in a low-incidence area of Italy was investigated by determining, in autochthonous and immigrant TB patients, the molecular characteristics of the Mycobacterium tuberculosis complex (MTBC) isolates, which may provide information on their phylogeographical origin. A total of 1080 MTBC strains, collected during a 4- ye…	eng	Clinical microbiology and infection : the official publication of the European Society of Clinical Microbiology and Infectious Diseases	Clin Microbiol Infect	9516420	2010	Nov		16	11	1691-7	Internet	C Garzelli	Garzelli, C; Lari, N; Cuccu, B; Tortoli, E; Rindi, L	Dipartimento di Patologia Sperimentale, Biotecnologie Mediche, Università di Pisa, Italy. garzelli@biomed.unipi.it	journal
	1		Indonesia	1				1	0	1	KEW				PubMed	329615	20064071	10.1086/650311	Mycobacterium tuberculosis Beijing genotype is an independent risk factor for tuberculosis treatment failure in Indonesia	Animal studies have shown that the globally emerging Beijing genotype strains of Mycobacterium tuberculosis are more virulent than other strains. We examined whether Beijing strains increase treatment failure in a prospective cohort study in Indonesia. Among 818 tuberculosis cases, positive sputum culture results after 6 months of treatment were more common among patients infected with Beijing st…	eng	The Journal of infectious diseases	J Infect Dis	413675	2010	Feb		201	4	553-7	Internet	Ida Parwati	Parwati, I; Alisjahbana, B; Apriani, L; Soetikno, RD; Ottenhoff, TH; van der Zanden, AG; van der Meer, J; van Soolingen, D; van Crevel, R	Department of Clinical Pathology, Hasan Sadikin Hospital, Medical Faculty, Universitas Padjadjaran, Bandung, Indonesia.	journal
	1		Australia	1				1	0	0	JRL				PubMed	329885	20350221	10.3109/00313021003631346	Three-year longitudinal study of genotypes of Mycobacterium tuberculosis in a low prevalence population	To investigate the molecular epidemiology of tuberculosis, temporal and spatial distribution of Mycobacterium tuberculosis isolates and associations between genotypes and clinical characteristics, in a low prevalence population.A total of 930 M. tuberculosis isolates referred to the New South Wales (NSW, Australia) Mycobacterium Reference Laboratory in 2004-2006 were characterised by mycobacteria…	eng	Pathology	Pathology	175411	2010	Apr		42	3	267-72	Internet	Blanca Gallego	Gallego, B; Sintchenko, V; Jelfs, P; Coiera, E; Gilbert, GL	Centre for Health Informatics, University of New South Wales, Sydney, Australia.	journal
	1	This is a prospective cohort study. Final sample contained 55% of all TB cases in this location	Zambia	1				1	0	0	JRL				PubMed	328601	20565802	10.1186/1471-2334-10-177	Diversity of Mycobacterium tuberculosis genotypes circulating in Ndola, Zambia	Tuberculosis (TB) is one of the major public health problems in Zambia. However, information about lineages of M. tuberculosis complex (MTBC) isolates useful for epidemiology investigations is unknown. In this study, we investigated the diversity of MTBC isolates from Ndola, a typical Zambian urbanized city with a documented high HIV prevalence.This was part of a prospective cohort study in subje…	eng	BMC infectious diseases	BMC Infect Dis	100968551	2010	Jun		10		177	Internet	Chanda Mulenga	Mulenga, C; Shamputa, IC; Mwakazanga, D; Kapata, N; Portaels, F; Rigouts, L	Tropical Diseases Research Center, Ndola, Zambia. chandamulenga@yahoo.com	journal
	1		Oman	1				1	0	0	JRL				PubMed	328544	20626944		A snapshot of the biodiversity and clustering of Mycobacterium tuberculosis in Oman using spoligotyping	National Tuberculosis Reference Laboratory, Central Public Health Laboratory, Ministry of Health, Oman.To use spoligotyping to explore the genetic population structure and clustering of Mycobacterium tuberculosis isolates among nationals and immigrants in Oman.Using spoligotyping, we characterised all available isolates from 2007, and randomly selected isolates from 2005 and 2006. A total of 312 …	eng	The international journal of tuberculosis and lung disease : the official journal of the International Union against Tuberculosis and Lung Disease	Int J Tuberc Lung Dis	9706389	2010	Aug		14	8	994-1000	Internet	A Al-Maniri	Al-Maniri, A; Singh, JP; Al-Rawas, O; Al Busaidi, S; Al Balushi, L; Ahmed, I; Al Mahruqi, S; Haile, M; Diwan, VK; Hoffner, S	Department of Public Health Sciences, Division of Global Health, Karolinska Institute, Stockholm, Sweden.	journal
	1		Ireland	1				1	0	0	JRL				PubMed	329300	20637901	10.1016/j.meegid.2010.07.008	Molecular epidemiology of Mycobacterium tuberculosis clinical isolates in Southwest Ireland	Tuberculosis has had significant effects on Ireland over the past two centuries, causing persistently higher morbidity and mortality than in neighbouring countries until the last decade. This study describes the results of genotyping and drug susceptibility testing of 171 strains of Mycobacterium tuberculosis complex isolated between January 2004 and December 2006 in a region of Ireland centred o…	eng	Infection, genetics and evolution : journal of molecular epidemiology and evolutionary genetics in infectious diseases	Infect Genet Evol	101084138	2010	Oct		10	7	1110-6	Internet	Olabisi O Ojo	Ojo, OO; Sheehan, S; Corcoran, DG; Nikolayevsky, V; Brown, T; O'Sullivan, M; O'Sullivan, K; Gordon, SV; Drobniewski, F; Prentice, MB	Department of Microbiology, University College Cork, Cork, Ireland.	journal
	1		Mozambique	1				1	0	0	KEW				PubMed	329281	20663126	10.1186/1471-2180-10-195	Molecular diversity of Mycobacterium tuberculosis isolates from patients with pulmonary tuberculosis in Mozambique	Mozambique is one of the countries with the highest burden of tuberculosis (TB) in Sub-Saharan Africa, and information on the predominant genotypes of Mycobacterium tuberculosis circulating in the country are important to better understand the epidemic. This study determined the predominant strain lineages that cause TB in Mozambique.A total of 445 M. tuberculosis isolates from seven different pr…	eng	BMC microbiology	BMC Microbiol	100966981	2010	Jul		10		195	Internet	Sofia O Viegas	Viegas, SO; Machado, A; Groenheit, R; Ghebremichael, S; Pennhag, A; Gudo, PS; Cuna, Z; Miotto, P; Hill, V; Marrufo, T; Cirillo, DM; Rastogi, N; Källenius, G; Koivula, T	Faculty of Veterinary, Eduardo Mondlane University, Maputo Mozambique. viegas_sofia@hotmail.com	journal
	1	Extracted from graph utilizing web plot digitizer.	Honduras	1				1	0	0	JRL				PubMed	329285	20678242	10.1186/1471-2180-10-208	Molecular diversity of Mycobacterium tuberculosis isolates from patients with tuberculosis in Honduras	Tuberculosis persists as a public health problem in Honduras. A better knowledge of the molecular characteristics of Mycobacterium tuberculosis strains will contribute to understand the transmission dynamics of the disease within the country. The aim of this study was to provide an insight of the genetic biodiversity of M. tuberculosis clinical isolates collected in Honduras between 1994 and 2002…	eng	BMC microbiology	BMC Microbiol	100966981	2010	Aug		10		208	Internet	Senia Rosales	Rosales, S; Pineda-García, L; Ghebremichael, S; Rastogi, N; Hoffner, SE	Escuela de Microbiología, Universidad Nacional Autónoma de Honduras, Tegucigalpa, Honduras. senia.rosales@smi.se	journal
	1		Georgia	1				1	1	0	JRL				PubMed	329633	20702677	10.1128/JCM.00715-10	Mycobacterium tuberculosis Beijing lineage favors the spread of multidrug-resistant tuberculosis in the Republic of Georgia	High rates and transmission of multidrug-resistant (MDR) tuberculosis (TB) have been associated with the Mycobacterium tuberculosis complex (MTBC) Beijing lineage, pointing to the importance of pathogen genetic factors for the modulation of infection outcome and epidemiology. We present here an in-depth analysis of the population structure of MTBC strains from the Republic of Georgia, a high-inci…	eng	Journal of clinical microbiology	J Clin Microbiol	7505564	2010	Oct		48	10	3544-50	Internet	Stefan Niemann	Niemann, S; Diel, R; Khechinashvili, G; Gegia, M; Mdivani, N; Tang, YW	Molecular Mycobacteriology, National Reference Center for Mycobacteria, Research Center Borstel, Borstel, Germany. sniemann@fz-borstel.de	journal
	1		India	1				1	1	1	KEW				PubMed	329863	20720028	10.1128/JCM.00430-10	Strains of Mycobacterium tuberculosis from western Maharashtra, India, exhibit a high degree of diversity and strain-specific associations with drug resistance, cavitary disease, and treatment failure	We performed spoligotyping of Mycobacterium tuberculosis isolates from 833 systematically sampled pulmonary tuberculosis (TB) patients in urban Mumbai, India (723 patients), and adjacent rural areas in western India (110 patients). The urban cohort consisted of two groups of patients, new cases (646 patients) and first-time treatment failures (77 patients), while only new cases were recruited in …	eng	Journal of clinical microbiology	J Clin Microbiol	7505564	2010	Oct		48	10	3593-9	Internet	Anirvan Chatterjee	Chatterjee, A; D'Souza, D; Vira, T; Bamne, A; Ambe, GT; Nicol, MP; Wilkinson, RJ; Mistry, N	Foundation for Medical Research, Worli, Mumbai, India.	journal
	1		South Korea	1				1	0	0	JRL				PubMed	328861	21165284	10.3346/jkms.2010.25.12.1716	IS6110-restriction fragment length polymorphism and spoligotyping analysis of Mycobacterium tuberculosis clinical isolates for investigating epidemiologic distribution in Korea	The Beijing family of Mycobacterium tuberculosis has been emerging in the world. However, there are few nationwide data of genotypic distribution in Korea. This study aimed to identify the genotypic diversity of clinical isolates of M. tuberculosis and to demonstrate the population of Beijing family in Korea. We collected 96 clinical M. tuberculosis isolates from 11 university hospitals nationwid…	eng	Journal of Korean medical science	J Korean Med Sci	8703518	2010	Dec		25	12	1716-21	Internet	Go Eun Choi	Choi, GE; Jang, MH; Song, EJ; Jeong, SH; Kim, JS; Lee, WG; Uh, Y; Roh, KH; Lee, HS; Shin, JH; Ryoo, NH; Kim, YR; Jeong, J; Kim, JH; Lee, SM; Yi, J; Hwang, SH; Kim, HH; Lee, EY; Chang, CL; Kim, MB; Kim, YD	Department of Laboratory Medicine, School of Medicine, Pusan National University, Busan, Korea.	journal
unclear	1	Important to note that the study used case notifications, then took a simple random sample of those notifications	Russia	1				1	0	0	JRL				PubMed	328554	18801045	10.1111/j.1574-695X.2008.00470.x	At Baltic crossroads: a molecular snapshot of Mycobacterium tuberculosis population diversity in Kaliningrad, Russia	The Kaliningrad region is the westernmost part of the Russian Federation; it includes an enclave on the Baltic Sea inside the European Union separated from mainland Russia by Lithuania and Poland. The incidence of tuberculosis in Kaliningrad has shown a steady and dramatic increase from 83/100,000 in 2000 to 134/100,000 in 2006; the rate of multidrug-resistant tuberculosis (MDR-tuberculosis) in t…	eng	FEMS immunology and medical microbiology	FEMS Immunol Med Microbiol	9315554	2009	Jan		55	1	13-22	Internet	Igor Mokrousov	Mokrousov, I; Otten, T; Zozio, T; Turkin, E; Nazemtseva, V; Sheremet, A; Vishnevsky, B; Narvskaya, O; Rastogi, N	Laboratory of Molecular Microbiology, St Petersburg Pasteur Institute, St Petersburg, Russia. imokrousov@mail.ru	journal
	1		Myanmar	1				1	1	0	KEW				PubMed	329701	19036933	10.1128/JCM.01812-08	Predominance of Mycobacterium tuberculosis EAI and Beijing lineages in Yangon, Myanmar	Isolates of the Mycobacterium tuberculosis Beijing lineage are associated with high rates of transmission, hypervirulence and drug resistance. The Beijing lineage has been shown to dominate the tuberculosis (TB) epidemic in East Asia; however, the diversity and frequency of M. tuberculosis genotypes from Myanmar are unknown. We present the first comprehensive study describing the M. tuberculosis …	eng	Journal of clinical microbiology	J Clin Microbiol	7505564	2009	Feb		47	2	335-44	Internet	Sabai Phyu	Phyu, S; Stavrum, R; Lwin, T; Svendsen, ØS; Ti, T; Grewal, HM	Section for Microbiology and Immunology, The Gade Institute, University of Bergen and Haukeland University Hospital, Bergen, Norway.	journal
	1		The Gambia	1				1	1	0	KEW				PubMed	329896	19193842	10.1128/JCM.01216-08	Use of spoligotyping and large sequence polymorphisms to study the population structure of the Mycobacterium tuberculosis complex in a cohort study of consecutive smear-positive tuberculosis cases in The Gambia	Mycobacterium africanum, first described in Senegal in 1968, causes up to half of the smear-positive pulmonary tuberculosis cases in West Africa, but it has not been found in other geographical areas except among recent West African migrants. The reasons for the geographic restriction of M. africanum are unknown. We used molecular tools to determine the population structure of the Mycobacterium t…	eng	Journal of clinical microbiology	J Clin Microbiol	7505564	2009	Apr		47	4	994-1001	Internet	Bouke C de Jong	de Jong, BC; Antonio, M; Awine, T; Ogungbemi, K; de Jong, YP; Gagneux, S; DeRiemer, K; Zozio, T; Rastogi, N; Borgdorff, M; Hill, PC; Adegbola, RA	MRC Laboratories, P.O. Box 273, Banjul, The Gambia. bdejong@mrc.gm.	journal
	1		India	1				1	0	0	JRL				PubMed	328859	19234602	10.1371/journal.pone.0004540	In-depth molecular characterization of Mycobacterium tuberculosis from New Delhi--predominance of drug resistant isolates of the 'modern' (TbD1) type	India has the highest estimated burden of tuberculosis in the world, accounting for 21% of all tuberculosis cases world-wide. However, due to lack of systematic analysis using multiple markers the available information on the genomic diversity of Mycobacterium tuberculosis in India is limited.Thus, 65 M. tuberculosis isolates from New Delhi, India were analyzed by spoligotyping, MIRU-VNTR, large …	eng	PloS one	PLoS One	101285081	2009			4	2	e4540	Internet	Ruth Stavrum	Stavrum, R; Myneedu, VP; Arora, VK; Ahmed, N; Grewal, HM	Gade Institute, Section for Microbiology and Immunology, University of Bergen, Bergen, Norway.	journal
hospital, rflp	1		South Africa	1				1	0	0	KEW				PubMed	329696	19261801	10.1128/JCM.02490-08	Mycobacterium tuberculosis transmission is not related to household genotype in a setting of high endemicity	Among the different strains of Mycobacterium tuberculosis, Beijing has been identified as an emerging genotype. Enhanced transmissibility provides a potential mechanism for genotype selection. This study evaluated whether the Beijing genotype is more readily transmitted than other prevalent genotypes to children in contact with an adult tuberculosis (TB) index case in the child's household. We co…	eng	Journal of clinical microbiology	J Clin Microbiol	7505564	2009	May		47	5	1338-43	Internet	B J Marais	Marais, BJ; Hesseling, AC; Schaaf, HS; Gie, RP; van Helden, PD; Warren, RM	Department of Paediatrics and Child Health, Faculty of Health Sciences, Stellenbosch University, Tygerberg, South Africa. bjmarais@sun.ac.za	journal
	1		South Africa	1				1	0	0	KEW				PubMed	328837	19386854	10.1128/JCM.02167-08	High diversity of Mycobacterium tuberculosis genotypes in South Africa and preponderance of mixed infections among ST53 isolates	The reemergence of tuberculosis (TB) has become a major health problem worldwide, especially in Asia and Africa. Failure to combat this disease due to nonadherence or inappropriate drug regimens has selected for the emergence of multiple-drug-resistant (MDR) TB. The development of new molecular genotyping techniques has revealed the presence of mixed Mycobacterium tuberculosis infections, which m…	eng	Journal of clinical microbiology	J Clin Microbiol	7505564	2009	Jun		47	6	1848-56	Internet	Ruth Stavrum	Stavrum, R; Mphahlele, M; Ovreås, K; Muthivhi, T; Fourie, PB; Weyer, K; Grewal, HM	Section of Microbiology and Immunology, The Gade Institute, University of Bergen and Haukeland University Hospital, N-5021 Bergen, Norway. Harleen.Grewal@Gades.uib.no.	journal
	1		Trinidad and Tobago	1				1	0	0	JRL				PubMed	328666	19403776	10.1128/JCM.00535-09	First insight into Mycobacterium tuberculosis epidemiology and genetic diversity in Trinidad and Tobago	This report is based on a 1-year recruitment of all of the culture-positive Mycobacterium tuberculosis cases in Trinidad and Tobago (n = 132). The study population was characterized by a high male-to-female sex ratio of 4 and a human immunodeficiency virus-tuberculosis (TB) coinfection rate of 30%. It mainly occurred among African descendants, who represent 37.5% of the total population but 69.7%…	eng	Journal of clinical microbiology	J Clin Microbiol	7505564	2009	Jun		47	6	1911-4	Internet	Shirematee Baboolal	Baboolal, S; Millet, J; Akpaka, PE; Ramoutar, D; Rastogi, N	Department of Para-Clinical Sciences, Faculty of Medical Sciences, The University of the West Indies, St. Augustine, Trinidad and Tobago.	journal
	1		Brazil	1				1	0	0	JRL				PubMed	328574	19665929	10.1016/j.tube.2009.05.009	Clonal diversity of M tuberculosis isolated in a sea port city in Brazil	Genotyping tools have been widely used to study the occurrence of outbreaks and to identify the patterns of transmission of Mycobacterium tuberculosis strains. The clonal diversity of 65 clinical isolates of M. tuberculosis was determined by PCR methods. The Double Repeat Element method (DRE-PCR) and spoligotyping identified 45 and 26 distinct patterns respectively. Among these, LAM (38%) was the…	eng	Tuberculosis (Edinburgh, Scotland)	Tuberculosis (Edinb)	100971555	2009	Nov		89	6	443-7	Internet	Ana Bárbara Scholante Silva	Scholante Silva, AB; Von Groll, A; Félix, C; Conceição, FR; Spies, FS; Scaini, CJ; Rossetti, ML; Borsuk, S; Dellagostin, OA; Almeida da Silva, PE	Universidade Federal do Rio Grande, FURG, Brazil. absholante@yahoo.com.br	journal
	1		Pakistan	1				1	0	0	KEW				PubMed	329726	19681020	10.1080/00365540903147019	Prevalence of ST26 among untreated smear-positive tuberculosis patients from Karachi indicating ongoing transmission	Tuberculosis (TB) control is a major healthcare priority for Pakistan. We have studied Mycobacterium tuberculosis strains from the sputa of 100 treatment-naïve, smear-positive pulmonary TB cases from Karachi, Pakistan, to identify strains most responsible for active transmission in this population. DNA extracted from M. tuberculosis isolates were subjected to spacer oligotyping (spoligotyping). S…	eng	Scandinavian journal of infectious diseases	Scand J Infect Dis	215333	2009			41	10	714-9	Internet	Sadia Shakoor	Shakoor, S; Tanveer, M; Rafiq, Y; Hasan, Z; Javed, A; Rizvi, N; Rehman, N; Hasan, R	Department of Clinical Microbiology, the Aga Khan University Hospital, Karachi, Pakistan. sadia.shakkoor@aku.edu	journal
hospital	1		Brazil	1				1	0	0	JRL				PubMed	329729	19767863	10.1139/w09-033	Prospective study applying spoligotyping directly to DNA from sputum samples of patients suspected of having tuberculosis	A prospective study was designed to evaluate the clinical usefulness of spoligotyping applied directly to sputum samples. Patients suspected of having tuberculosis were recruited at the Hospital Sanatorio Partenon in Porto Alegre, Brazil. Of the 197 samples included in the analysis, 175 (88.8%) yielded a spoligotyping result that fully matched that obtained from culture. Low bacillary samples pre…	eng	Canadian journal of microbiology	Can J Microbiol	372707	2009	Jul		55	7	895-900	Internet	Patricia Izquierdo Cafrune	Cafrune, PI; Possuelo, LG; Ribeiro, AW; Ribeiro, MO; Unis, G; Jarczewski, CA; Rossetti, ML; Zaha, A	Programa de Pós-Graduação em Ciências Biológicas: Bioquímica, Universidade Federal do Rio Grande do Sul, Rua Ramiro Barcelos 2600, Porto Alegre, RS 90035-003, Brazil. patricia_cafrune@hotmail.com	journal
	1		Russia	1				1	0	0	JRL				PubMed	329287	19793435		Molecular epidemiology and drug resistance of widespread genotypes of Mycobacterium tuberculosis in northwestern Russia	Four administrative territories (Archangel Oblast, Murmansk Oblast, Republic of Karelia, Republic of Komi) in the northwestern federal region of Russia.To describe the genetic diversity and level of drug resistance in Mycobacterium tuberculosis isolates from new cases of pulmonary tuberculosis.A total of 176 isolates of M. tuberculosis were tested for drug susceptibility and typed with insertion …	eng	The international journal of tuberculosis and lung disease : the official journal of the International Union against Tuberculosis and Lung Disease	Int J Tuberc Lung Dis	9706389	2009	Oct		13	10	1288-93	Internet	A A Baranov	Baranov, AA; Mariandyshev, AO; Mannsåker, T; Dahle, UR; Bjune, GA	Department of Phthisiopulmonology, Northern State Medical University, Archangel, Russia.	journal
unclear	1		UK	1				1	0	0	JRL				PubMed	328592	19861054	10.3201/eid1510.090463	Discriminatory ability of hypervariable variable number tandem repeat loci in population-based analysis of Mycobacterium tuberculosis strains, London, UK	To address conflicting results about the stability of variable number tandem repeat (VNTR) loci and their value in prospective molecular epidemiology of Mycobacterium tuberculosis, we conducted a large prospective population-based analysis of all M. tuberculosis strains in a metropolitan setting. Optimal and reproducible conditions for reliable PCR and fragment analysis, comprising enzymes, denat…	eng	Emerging infectious diseases	Emerg Infect Dis	9508155	2009	Oct		15	10	1609-16	Internet	Preya Velji	Velji, P; Nikolayevskyy, V; Brown, T; Drobniewski, F	Barts and The London School of Medicine, Queen Mary, University of London, London, UK.	journal
hospital	1		Indonesia	1				1	0	0	JRL				PubMed	328014	19863441	10.1086/648477	Infection with Mycobacterium tuberculosis Beijing genotype strains is associated with polymorphisms in SLC11A1/NRAMP1 in Indonesian patients with tuberculosis	Differences in host immune genes may predispose to tuberculosis caused by particular Mycobacterium tuberculosis genotypes. We examined this hypothesis in Indonesia by spoligotyping M. tuberculosis isolates recovered from 336 patients with pulmonary tuberculosis and typing the patients' SLC11A1 gene (formerly known as ""NRAMP1""), which is involved in susceptibility to tuberculosis. The M. tubercu…	eng	The Journal of infectious diseases	J Infect Dis	413675	2009	Dec		200	11	1671-4	Internet	Reinout van Crevel	van Crevel, R; Parwati, I; Sahiratmadja, E; Marzuki, S; Ottenhoff, TH; Netea, MG; van der Ven, A; Nelwan, RH; van der Meer, JW; Alisjahbana, B; van de Vosse, E	Department of Internal Medicine and Nijmegen Institute for Infection, Inflammation, and Immunity (N4i), Radboud University Nijmegen Medical Center, Nijmegen, The Netherlands. r.vancrevel@aig.umcn.nl	journal
unclear	1		India	1				1	0	0	JRL				PubMed	328823	18024233	10.1016/j.meegid.2007.09.007	Genomic interrogation of ancestral Mycobacterium tuberculosis from south India	Mycobacterium tuberculosis is a very important global pathogen. One quarter of the world's TB cases occur in India. The tuberculosis strains isolated from south Indian patients exhibit certain phenotypic characteristics like low virulence in guinea-pigs, resistance to isoniazid, thiophene-2-carboxylic acid hydrazide (TCH) and para-amino salicylic acid (PAS), and enhanced susceptibility to H2O2. B…	eng	Infection, genetics and evolution : journal of molecular epidemiology and evolutionary genetics in infectious diseases	Infect Genet Evol	101084138	2008	Jul		8	4	474-83	Print	Sujatha Narayanan	Narayanan, S; Gagneux, S; Hari, L; Tsolaki, AG; Rajasekhar, S; Narayanan, PR; Small, PM; Holmes, S; Deriemer, K	Tuberculosis Research Centre, Mayor VR Ramanathan Road, Chetput, Chennai, India. sujatha.sujatha36@gmail.com	journal
	1	sample represents more than 25 of all clinical isolates in area. Methods seem okay but may need a second check	Turkey	1				1	0	0	JRL				PubMed	328523	18034858	10.1111/j.1469-0691.2007.01882.x	A first insight into the genetic diversity and population structure of Mycobacterium tuberculosis in Zonguldak, Turkey	This study evaluated the molecular epidemiology and biodiversity of Mycobacterium tuberculosis isolates in Zonguldak, Turkey, and investigated the presence and significance of the LAM7-TUR clone by spoligotyping and mycobacterial interspersed repetitive unit-variable number tandem repeat (MIRU-VNTR) analysis. In total, 128 isolates were tested by spoligotyping; 25 selected isolates representative…	eng	Clinical microbiology and infection : the official publication of the European Society of Clinical Microbiology and Infectious Diseases	Clin Microbiol Infect	9516420	2008	Jan		14	1	55-9	Print	E Akta?	Akta?, E; Zozio, T; Cömert, FB; Külah, C; Aydin, O; Rastogi, N; Sola, C	Faculty of Medicine, Department of Microbiology and Clinical Microbiology, Zonguldak Karaelmas University, Zonguldak, Turkey. drelifaktas@yahoo.com	journal
	1		Bulgaria	1				1	0	0	JRL				PubMed	329278	18199794	10.1128/JCM.01841-07	Molecular characterization of Mycobacterium tuberculosis isolates from different regions of Bulgaria	Mycobacterium tuberculosis isolates from different regions of Bulgaria were studied by a variety of molecular typing tools. Based on spacer oligonucleotide typing (spoligotyping), the 113 strains were subdivided into 35 spoligotypes: 5 unique profiles and 15 profiles shared by two to 29 strains; the Hunter-Gaston diversity index (HGI) was 0.9. Comparison with the international database SITVIT2 at…	eng	Journal of clinical microbiology	J Clin Microbiol	7505564	2008	Mar		46	3	1014-8	Internet	Violeta Valcheva	Valcheva, V; Mokrousov, I; Rastogi, N; Narvskaya, O; Markova, N	Department of Pathogenic Bacteria, The Stephan Angeloff Institute of Microbiology, Bulgarian Academy of Sciences, Sofia 1113, Bulgaria.	journal
hospital	1		India	1				1	0	0	JRL				PubMed	329738	18372222	10.1016/j.meegid.2008.02.005	Role of spoligotyping and IS6110-RFLP in assessing genetic diversity of Mycobacterium tuberculosis in India	In the present study, genetic diversity analysis of Mycobacterium tuberculosis isolated from patients attending a tertiary care hospital, North India, has been attempted. Eighty three isolates of M. tuberculosis were subjected to DNA fingerprinting using spoligotyping and IS6110-RFLP techniques. Spoligotype patterns showed that central Asian (32.5%), ill defined T (13.2%) and Beijing (10.8%) fami…	eng	Infection, genetics and evolution : journal of molecular epidemiology and evolutionary genetics in infectious diseases	Infect Genet Evol	101084138	2008	May		8	3	346-51	Print	Jitendra Prasad Mathuria	Mathuria, JP; Sharma, P; Prakash, P; Samaria, JK; Katoch, VM; Anupurba, S	Department of Microbiology, Institute of Medical Sciences, Banaras Hindu University, Varanasi 221005, India.	journal
	1	Area of interest in study is mostly compromised of indigenous populations. Still extracted because the study did not systematically exclude populations	Taiwan	1				1	0	0	JRL				PubMed	329854	18467190	10.1016/j.meegid.2008.03.003	Spoligotypes of Mycobacterium tuberculosis isolates of a high tuberculosis burden aboriginal township in Taiwan	To understand the genotype of Mycobacterium tuberculosis isolates circulating in the aboriginal Sioulin Township, the highest tuberculosis (TB) endemic area in Taiwan, a total of 138 isolates were collected between January 2003 and December 2004 for genotyping. Genotyping consisted of spacer oligonucleotide typing (spoligotyping), IS6110-restriction fragment length polymorphism (RFLP) and mgtC an…	eng	Infection, genetics and evolution : journal of molecular epidemiology and evolutionary genetics in infectious diseases	Infect Genet Evol	101084138	2008	Sep		8	5	553-7	Print	Pei-Chun Chuang	Chuang, PC; Liu, H; Sola, C; Chen, YM; Jou, R	Reference Laboratory of Mycobacteriology, Research and Diagnostic Center, Centers for Disease Control, 161 Kun-Yang Street, Nan-Kang, Taipei 115, Taiwan, ROC.	journal
	1		Sri Lanka	1				1	0	0	JRL				PubMed	329284	18513770	10.1016/j.trstmh.2008.04.025	Molecular diversity of Mycobacterium tuberculosis isolates from patients with pulmonary tuberculosis in Sri Lanka	The strain diversity of 100 Mycobacterium tuberculosis isolates collected over a period of 18 months from tuberculosis (TB) cases in Sri Lanka was studied by spoligotyping. When compared to the international spoligotyping database, 43 spoligotype patterns were identified, of which 20 were previously described. The majority of isolates (72.45%) were clustered into major genetic group 1, and the mo…	eng	Transactions of the Royal Society of Tropical Medicine and Hygiene	Trans R Soc Trop Med Hyg	7506129	2008	Oct		102	10	997-1002	Internet	U S Rajapaksa	Rajapaksa, US; Victor, TC; Perera, AJ; Warren, RM; Senevirathne, SM	Department of Microbiology, Faculty of Medicine, University of Colombo, P.O. Box 271, Kynsey Road, Colombo 08, Sri Lanka. ushanir@yahoo.com	journal
	1	only representative of northern tunisia	Tunisia	1				1	0	0	JRL				PubMed	328746	18566145	10.1099/jmm.0.47483-0	Genetic profiling of Mycobacterium tuberculosis in Tunisia: predominance and evidence for the establishment of a few genotypes	Typing analyses of 378 Mycobacterium tuberculosis isolates collected between the years 2001 and 2005 from three northern representative regions of Tunisia revealed a highly homogeneous population. Indeed, 84.9 % of all tuberculosis (TB) cases were attributed to the Haarlem, LAM or T families. Strikingly, within each family, more than 60 % of TB cases were due to a single genotype. ST50 (Haarlem3)…	eng	Journal of medical microbiology	J Med Microbiol	224131	2008	Jul		57	Pt 7	864-72	Print	Amine Namouchi	Namouchi, A; Karboul, A; Mhenni, B; Khabouchi, N; Haltiti, R; Ben Hassine, R; Louzir, B; Chabbou, A; Mardassi, H	Unit of Typing and Genetics of Mycobacteria, Institut Pasteur de Tunis (Tunisia), 13 Place Pasteur, BP 74, Tunis, Tunisia.	journal
	1	Article has very rich data as it goes to the admin 4 level. However, 38 out of the 97 strains went unreported so I had to group them into other and placed them into the admin 2 level.	India	1				1	0	0	JRL				PubMed	329534	18567544	10.1016/j.meegid.2008.05.002	Molecular typing of Mycobacterium tuberculosis isolates from a rural area of Kanpur by spoligotyping and mycobacterial interspersed repetitive units (MIRUs) typing	Molecular typing of Mycobacterium tuberculosis isolates has greatly facilitated the understanding of epidemiology of tuberculosis (TB). This study was done to characterize prevalent genotypes of M. tuberculosis on a collection of 97 isolates based on spoligotyping and mycobacterial interspersed repetitive units-variable number of tandem repeats (MIRU-VNTR) typing in rural area of Kanpur, North In…	eng	Infection, genetics and evolution : journal of molecular epidemiology and evolutionary genetics in infectious diseases	Infect Genet Evol	101084138	2008	Sep		8	5	621-6	Print	Pragya Sharma	Sharma, P; Chauhan, DS; Upadhyay, P; Faujdar, J; Lavania, M; Sachan, S; Katoch, K; Katoch, VM	Department of Microbiology and Molecular Biology, National JALMA Institute for Leprosy and Other Mycobacterial Diseases (ICMR), Tajganj, Agra 282001, India.	journal
	1	unsure of the administrative unit	Uganda	1				1	0	0	JRL				PubMed	329693	18662405	10.1186/1471-2334-8-101	Mycobacterium tuberculosis spoligotypes and drug susceptibility pattern of isolates from tuberculosis patients in peri-urban Kampala, Uganda	The poor peri-urban areas of developing countries with inadequate living conditions and a high prevalence of HIV infection have been implicated in the increase of tuberculosis (TB). Presence of different lineages of Mycobacterium tuberculosis has been described in different parts of the world. This study determined the predominant strain lineages that cause TB in Rubaga division, Kampala, Uganda,…	eng	BMC infectious diseases	BMC Infect Dis	100968551	2008	Jul		8		101	Internet	Benon B Asiimwe	Asiimwe, BB; Ghebremichael, S; Kallenius, G; Koivula, T; Joloba, ML	Department of Medical Microbiology, Makerere University Medical School, Kampala, Republic of Uganda. benon.asiimwe@ki.se	journal
unclear	1		India	1				1	0	0	JRL				PubMed	328683	18812040		Genetic diversity in clinical Mycobacterium tuberculosis isolates from Punjab	Two hospitals, Sri Guru Ram Das Institute of Medical Sciences and Research and the TB and Chest Hospital, Amritsar, Punjab.To explore genetic diversity among the clinical Mycobacterium tuberculosis isolates prevalent in Punjab.Fifty-six random clinical isolates of M. tuberculosis were cultured from the sputum specimens of pulmonary tuberculosis patients. DNA was extracted from cultured biomass an…	eng	The international journal of tuberculosis and lung disease : the official journal of the International Union against Tuberculosis and Lung Disease	Int J Tuberc Lung Dis	9706389	2008	Oct		12	10	1122-7	Print	R Sharma	Sharma, R; Kalyani, M; Kajal, NC; Sarin, BC; Sehajpal, PK	Department of Molecular Biology and Biochemistry, Guru Nanak Dev University, Amritsar, India.	journal
	1		Taiwan	1				1	0	0	JRL				PubMed	329290	19102768	10.1186/1471-2334-8-170	Molecular epidemiology and evolutionary genetics of Mycobacterium tuberculosis in Taipei	The control of tuberculosis in densely populated cities is complicated by close human-to-human contacts and potential transmission of pathogens from multiple sources. We conducted a molecular epidemiologic analysis of 356 Mycobacterium tuberculosis (MTB) isolates from patients presenting pulmonary tuberculosis in metropolitan Taipei. Classical antibiogram studies and genetic characterization, usi…	eng	BMC infectious diseases	BMC Infect Dis	100968551	2008	Dec		8		170	Internet	Horng-Yunn Dou	Dou, HY; Tseng, FC; Lin, CW; Chang, JR; Sun, JR; Tsai, WS; Lee, SY; Su, IJ; Lu, JJ	Division of Clinical Research, National Health Research Institutes, Zhunan, Taiwan, Republic of China. hydou@nhri.org.tw	journal
	1		Pakistan	1				1	1	0	KEW				PubMed	328833	19108722	10.1186/1471-2334-8-171	Genotyping and drug resistance patterns of M tuberculosis strains in Pakistan	The incidence of tuberculosis in Pakistan is 181/100,000 population. However, information about transmission and geographical prevalence of Mycobacterium tuberculosis strains and their evolutionary genetics as well as drug resistance remains limited. Our objective was to determine the clonal composition, evolutionary genetics and drug resistance of M. tuberculosis isolates from different regions …	eng	BMC infectious diseases	BMC Infect Dis	100968551	2008	Dec		8		171	Internet	Mahnaz Tanveer	Tanveer, M; Hasan, Z; Siddiqui, AR; Ali, A; Kanji, A; Ghebremicheal, S; Hasan, R	Department of Pathology and Microbiology, The Aga Khan University, Karachi, Pakistan. mahnaz.tanveer@aku.edu	journal
	1	Not completely sure of the sampling method here, went ahead and extracted because it seems okay but flagged just in case	Burkina Faso	1				1	0	0	JRL				PubMed	328679	17251410	10.1128/JCM.01918-06	First molecular epidemiology study of Mycobacterium tuberculosis in Burkina Faso	We conducted a molecular epidemiology study on 120 Mycobacterium tuberculosis isolates from patients presenting pulmonary tuberculosis (TB) in Burkina Faso. Classical antibiogram studies and genetic characterization, using mycobacterial interspersed repetitive-unit-variable-number tandem-repeat (MIRU-VNTR) typing and spoligotyping, were applied after culture. Molecular analysis of specific signat…	eng	Journal of clinical microbiology	J Clin Microbiol	7505564	2007	Mar		45	3	921-7	Print	S Godreuil	Godreuil, S; Torrea, G; Terru, D; Chevenet, F; Diagbouga, S; Supply, P; Van de Perre, P; Carriere, C; Bañuls, AL	Laboratoire de Bactériologie, Hôpital Universitaire Arnaud de Villeneuve, 371 Avenue du Doyen Gaston Giraud, F-34295 Montpellier Cedex 5, France. s-godreuil@chu-montpellier.fr	journal
	1		India	1				1	0	0	JRL				PubMed	328681	17317334	10.1016/j.meegid.2007.01.003	Genetic biodiversity of Mycobacterium tuberculosis isolates from patients with pulmonary tuberculosis in India	Spoligotyping was performed on 540 Mycobacterium tuberculosis isolates in order to evaluate the genetic biodiversity of tubercle bacilli in India. One hundred and forty seven patterns were unique and 393 were grouped in 48 clusters. Comparison with an international spoligotype database showed that the most predominant clades among tuberculosis (TB) isolates were Central Asian (CAS) and East-Afric…	eng	Infection, genetics and evolution : journal of molecular epidemiology and evolutionary genetics in infectious diseases	Infect Genet Evol	101084138	2007	Jul		7	4	441-8	Print	Urvashi Balbir Singh	Singh, UB; Arora, J; Suresh, N; Pant, H; Rana, T; Sola, C; Rastogi, N; Pande, JN	Department of Microbiology, All India Institute of Medical Sciences, New Delhi, India. urvashi00@hotmail.com	journal
	1	Only extracted the Zimbabwe isolates, as the sampling methods for the other locations were unclear	Zimbabwe and Zambia	1				1	0	0	JRL				PubMed	329699	17352098		Predominance of a single genotype of Mycobacterium tuberculosis in regions of Southern Africa	Zimbabwe and Zambia.To determine the genetic diversity of Mycobacterium tuberculosis strains isolated from tuberculosis (TB) patients in Zimbabwe and Zambia.M. tuberculosis isolates cultured from TB patients presenting at referral hospitals in Zimbabwe and health care clinics in Zambia were characterised by IS6110 genotyping and/or spoligotyping using internationally standardised methods. Genotyp…	eng	The international journal of tuberculosis and lung disease : the official journal of the International Union against Tuberculosis and Lung Disease	Int J Tuberc Lung Dis	9706389	2007	Mar		11	3	311-8	Print	V Chihota	Chihota, V; Apers, L; Mungofa, S; Kasongo, W; Nyoni, IM; Tembwe, R; Mbulo, G; Tembo, M; Streicher, EM; van der Spuy, GD; Victor, TC; van Helden, P; Warren, RM	Department of Science and Technology/National Research Foundation Centre of Excellence in Biomedical Tuberculosis Research/Medical Research Council Centre for Molecular and Cellular Biology, Stellenbosch University, South Africa.	journal
	1		Saudi Arabia	1				1	0	0	JRL				PubMed	328675	17507515	10.1128/JCM.02293-06	First insight into the population structure of Mycobacterium tuberculosis in Saudi Arabia	This study constitutes a first attempt to describe the genetic population structure and drug resistance of the tubercle bacilli circulating in Saudi Arabia. A total of 1,505 clinical isolates of M. tuberculosis, isolated between 2002 and 2005 from seven regions of Saudi Arabia, were studied. The sample studied showed a male-to-female sex ratio of 1.27, with half of the cases among foreign-born in…	eng	Journal of clinical microbiology	J Clin Microbiol	7505564	2007	Aug		45	8	2467-73	Print	Sahal A M Al-Hajoj	Al-Hajoj, SA; Zozio, T; Al-Rabiah, F; Mohammad, V; Al-Nasser, M; Sola, C; Rastogi, N	Department of Comparative Medicine, King Faisal Specialist Hospital and Research Center (MBC 03), PO Box 3354, Riyadh 11211, Saudi Arabia. hajoj@kfshrc.edu.sa	journal
	1		Tanzania	1				1	0	0	KEW				PubMed	329536	17540031	10.1186/1471-2180-7-51	M tuberculosis genotypic diversity and drug susceptibility pattern in HIV-infected and non-HIV-infected patients in northern Tanzania	Tuberculosis (TB) is a major health problem and HIV is the major cause of the increase in TB. Sub-Saharan Africa is endemic for both TB and HIV infection. Determination of the prevalence of M. tuberculosis strains and their drug susceptibility is important for TB control.TB positive culture, BAL fluid or sputum samples from 130 patients were collected and genotyped. The spoligotypes were correlat…	eng	BMC microbiology	BMC Microbiol	100966981	2007	May		7		51	Internet	Gibson S Kibiki	Kibiki, GS; Mulder, B; Dolmans, WM; de Beer, JL; Boeree, M; Sam, N; van Soolingen, D; Sola, C; van der Zanden, AG	Department of Internal Medicine, Endoscopy Unit, Kilimanjaro Christian Medical Centre, Tumaini University, Moshi, Tanzania. gkibiki@gmail.com <gkibiki@gmail.com>	journal
	1		Portugal	1				1	0	0	JRL				PubMed	328582	17625987	10.1016/j.meegid.2007.05.007	Contribution of spoligotyping to the characterization of the population structure of Mycobacterium tuberculosis isolates in Portugal	Tuberculosis is a major health problem in Portugal. To begin characterizing the population structure of Mycobacterium tuberculosis, spoligotyping was used for the systematic typing, through consecutive sampling, of patient isolates from the Amadora-Sintra area of Greater Lisbon. Distribution amongst major spoligotype families, including the Latin American Mediterranean (LAM), T, Haarlem and Beiji…	eng	Infection, genetics and evolution : journal of molecular epidemiology and evolutionary genetics in infectious diseases	Infect Genet Evol	101084138	2007	Sep		7	5	609-17	Print	Suzana David	David, S; Ribeiro, DR; Antunes, A; Portugal, C; Sancho, L; de Sousa, JG	Unidade de Ensino e Investigação (UEI) de Micobactérias, Instituto de Higiene e Medicina Tropical (IHMT), Universidade Nova de Lisboa (UNL), Lisbon, and Serviço de Patologia Clínica, Hospital Fernando Fonseca, Amadora, Portugal. sdavid@ibmc.up.pt	journal
	1		Paraguay	1				1	0	0	JRL				PubMed	328667	17686181	10.1186/1471-2180-7-75	First insight into Mycobacterium tuberculosis genetic diversity in Paraguay	We present a picture of the biodiversity of Mycobacterium tuberculosis in Paraguay, an inland South American country harboring 5 million inhabitants with a tuberculosis notification rate of 38/100,000.A total of 220 strains collected throughout the country in 2003 were classified by spoligotyping into 79 different patterns. Spoligopatterns of 173 strains matched 51 shared international types (SIT…	eng	BMC microbiology	BMC Microbiol	100966981	2007	Aug		7		75	Internet	Norma Candia	Candia, N; Lopez, B; Zozio, T; Carrivale, M; Diaz, C; Russomando, G; de Romero, NJ; Jara, JC; Barrera, L; Rastogi, N; Ritacco, V	Departamento de Biología Molecular, Instituto de Investigaciones en Ciencias de la Salud (IICS), Universidad Nacional de Asunción, Asunción, Paraguay. nccandia@yahoo.es	journal
	1	unclear or convenience sampling method	Bangladesh	0	1	Author indicated that sample represented all culture-positive samples		1	0	0	KEW	requested clarification of sampling methods 11/3/17	"To answer your question: all were culture positive samples."	Include	PubMed	358483	17804653	10.1128/JCM.01247-07	Assessment of population structure and major circulating phylogeographical clades of Mycobacterium tuberculosis complex in Bangladesh suggests a high prevalence of a specific subclade of ancient M tuberculosis genotypes	Spoligotyping was performed to study the population structure of Mycobacterium tuberculosis complex strains (n = 224) from Bangladesh. Strains were split into principal genetic group 1 (PGG 1 [75.0%]) and PGG 2 and 3 (25%). Forty-nine strains with a new spoligotype signature and considered as south or southeast Asian-linked emerging clones were designated as ""Matlab type.""	eng	Journal of clinical microbiology	J Clin Microbiol	7505564	2007	Nov		45	11	3791-4	Print	Zeaur Rahim	Rahim, Z; Zaman, K; van der Zanden, AG; Möllers, MJ; van Soolingen, D; Raqib, R; Zaman, K; Begum, V; Rigouts, L; Portaels, F; Rastogi, N; Sola, C	International Centre for Diarrhoeal Disease Research, Bangladesh, Center for Health and Population Research, Dhaka, Bangladesh. zeaur@icddrb.org	journal
	1		Brazil	1				1	0	0	KEW				PubMed	328591	17898156	10.1128/JCM.01394-07	Discovery of a novel Mycobacterium tuberculosis lineage that is a major cause of tuberculosis in Rio de Janeiro, Brazil	The current study evaluated Mycobacterium tuberculosis isolates from Rio de Janeiro, Brazil, for genomic deletions. One locus in our panel of PCR targets failed to amplify in approximately 30% of strains. A single novel long sequence polymorphism (>26.3 kb) was characterized and designated RD(Rio). Homologous recombination between two similar protein-coding genes is proposed as the mechanism for …	eng	Journal of clinical microbiology	J Clin Microbiol	7505564	2007	Dec		45	12	3891-902	Print	Luiz Claudio Oliveira Lazzarini	Lazzarini, LC; Huard, RC; Boechat, NL; Gomes, HM; Oelemann, MC; Kurepina, N; Shashkina, E; Mello, FC; Gibson, AL; Virginio, MJ; Marsico, AG; Butler, WR; Kreiswirth, BN; Suffys, PN; Lapa E Silva, JR; Ho, JL	Department of Medicine, Division of International Medicine and Infectious Diseases, Cornell University, Joan and Sanford I Weill Medical College, New York, NY 10021, USA.	journal
	1	Study only reports strain data on overseas territories	France	1				1	0	0	JRL				PubMed	329270	16390968	10.1128/JCM.44.1.183-191.2006	Long-term population-based genotyping study of Mycobacterium tuberculosis complex isolates in the French departments of the Americas	The three French overseas departments of the Americas are characterized both by insular (Guadeloupe and Martinique) and continental (French Guiana) settings with a tuberculosis case detection rate that varies from less than 10 per 100,000 per year in insular areas to an estimated incidence of more than 55 per 100,000 in French Guiana. Under a long-term genotyping program, more than three-fourths …	eng	Journal of clinical microbiology	J Clin Microbiol	7505564	2006	Jan		44	1	183-91	Print	Karine Brudey	Brudey, K; Filliol, I; Ferdinand, S; Guernier, V; Duval, P; Maubert, B; Sola, C; Rastogi, N	Unité de la tuberculose et des Mycobactéries, Institut Pasteur de Guadeloupe, Abymes, French Guiana.	journal
	1	outcome and covariate data may be available by strain	Iran	1				1	0	0	KEW				PubMed	329873	16798695	10.1080/00365540500504117	The most prevalent Mycobacterium tuberculosis superfamilies among Iranian and Afghan TB cases	This survey identified the spoligopatterns of Mycobacterium tuberculosis strains with an international designation responsible for transmission and prevalence of TB (2000 to 2005) among native and immigrant populations of Tehran. The spacer oligonucleotides typing was performed on 1742 Mycobacterium tuberculosis strains isolated from verified cases of TB. Clinical and demographic data of patients…	eng	Scandinavian journal of infectious diseases	Scand J Infect Dis	215333	2006			38	2017-06-07	463-8	Print	Ali Akbar Velayati	Velayati, AA; Farnia, P; Mirsaeidi, M; Reza Masjedi, M	National Research Institute of Tuberculosis and Lung Disease (NRITLD), Darabad, Tehran, Iran.	journal
hospital	1		Singapore	1				1	0	0	JRL				PubMed	328026	16820066	10.1186/1471-2334-6-105	Tuberculosis associated with Mycobacterium tuberculosis Beijing and non-Beijing genotypes: a clinical and immunological comparison	The Mycobacterium tuberculosis Beijing genotype is biologically different from other genotypes. We aimed to clinically and immunologically compare human tuberculosis caused by Beijing and non-Beijing strains.Pulmonary tuberculosis patients were prospectively enrolled and grouped by their M. tuberculosis genotypes. The clinical features, plasma cytokine levels, and cytokine gene expression levels …	eng	BMC infectious diseases	BMC Infect Dis	100968551	2006	Jul		6		105	Internet	Yong-Jiang Sun	Sun, YJ; Lim, TK; Ong, AK; Ho, BC; Seah, GT; Paton, NI	Department of Infectious Diseases, Tan Tock Seng Hospital, Republic of Singapore. Yong_Jiang_Sun@ttsh.com.sg	journal
	1		Tanzania	1				1	1	0	KEW				PubMed	328524	16970826	10.1186/1471-2180-6-76	A first insight into the genetic diversity of Mycobacterium tuberculosis in Dar es Salaam, Tanzania, assessed by spoligotyping	Tanzania has a high tuberculosis incidence, and genotyping studies of Mycobacterium tuberculosis in the country are necessary in order to improve our understanding of the epidemic. Spoligotyping is a potentially powerful genotyping method due to fast generation of genotyping results, high reproducibility and low operation costs. The recently constructed SpolDB4 database and the model-based progra…	eng	BMC microbiology	BMC Microbiol	100966981	2006	Sep		6		76	Internet	Vegard Eldholm	Eldholm, V; Matee, M; Mfinanga, SG; Heun, M; Dahle, UR	Division of Infectious Disease Control, Norwegian Institute of Public Health, Oslo, Norway. vegard.eldholm@fhi.no	journal
	1	unclear sampling method but data comes from national survey. Do not report strain data for whole sample	Venezuela	0	1	associated with drug resistance survey - include		1	0	0	JRL				Scopus	358487	17032442	10.1186/1471-2180-6-90	Molecular characterisation of Mycobacterium tuberculosis isolates in the First National Survey of Anti-tuberculosis Drug Resistance from Venezuela	Molecular typing of Mycobacterium tuberculosis strains has become a valuable tool in the epidemiology of tuberculosis (TB) by allowing detection of outbreaks, tracking of epidemics, identification of genotypes and transmission events among patients who would have remained undetected by conventional contact investigation. This is the first genetic biodiversity study of M. tuberculosis in Venezuela…	eng	BMC microbiology	BMC Microbiol	100966981	2006	Oct		6		90	Internet	Liselotte Aristimuño	Aristimuño, L; Armengol, R; Cebollada, A; España, M; Guilarte, A; Lafoz, C; Lezcano, MA; Revillo, MJ; Martín, C; Ramírez, C; Rastogi, N; Rojas, J; de Salas, AV; Sola, C; Samper, S	Escuela de Medicina, Universidad Centroccidental Lisandro Alvarado, Venezuela. lisearistimuno@yahoo.es	journal
	1		Spain	1				1	0	0	JRL				PubMed	328042	15815001	10.1128/JCM.43.4.1797-1806.2005	Analysis of Mycobacterium tuberculosis genotypes in Madrid and identification of two new families specific to Spain-related settings	In Spain, tuberculosis (TB) patterns are changing because of the recent increase in the number of cases among immigrants. To establish the composition of circulating Mycobacterium tuberculosis strains before the effects of foreign strains appear, this study focused on molecular characterization of 233 patient isolates using spoligotyping. The spoligotyping data were further analyzed using an inte…	eng	Journal of clinical microbiology	J Clin Microbiol	7505564	2005	Apr		43	4	1797-806	Print	Darío García de Viedma	García de Viedma, D; Bouza, E; Rastogi, N; Sola, C	Servicio de Microbiología y Enfermedades Infecciosas, Hospital Gregorio Marañón, C/ Dr Esquerdo 46, 28007 Madrid, Spain. dgviedma@microb.net	journal
	1	The sample may have issues as the male to female ration is 8:1 and the selected hospitals for data are those that low income patients are most likely to use. Article clusters strains together (ex: the article groups T, X, LAM, and Haarlem rather than reporting them separately). Additionally, the study does not report data collection dates. Still went ahead and extracted, but study may have issues	India	1				1	0	0	JRL				PubMed	329859	15862459	10.1016/j.resmic.2005.01.005	Spoligotyping of Mycobacterium tuberculosis isolates from patients with pulmonary tuberculosis in Mumbai, India	Tuberculosis remains a major health problem in India, with 2 million new cases and 421,000 deaths each year. In this paper, we describe the spoligotyping results of 216 Mycobacterium tuberculosis culture isolates from patients with pulmonary tuberculosis in Mumbai, India. As spoligotyping data from India have rarely been described until now, and as there is limited information on the major circul…	eng	Research in microbiology	Res Microbiol	8907468	2005	May		156	4	588-96	Print	Savita Kulkarni	Kulkarni, S; Sola, C; Filliol, I; Rastogi, N; Kadival, G	Laboratory Nuclear Medicine Section, Isotope Group, Bhabha Atomic Research Centre C/o T.M.H. Annexe, Parel, Mumbai 400012, India.	journal
	1		Sweden	1				1	0	0	KEW				PubMed	329348	15243058	10.1128/JCM.42.7.3046-3051.2004	Molecular epidemiology of Mycobacterium tuberculosis in western Sweden	The genetic diversity of Mycobacterium tuberculosis isolates among patients from Sweden was determined by a combination of two PCR-based techniques (spoligotyping and variable number of tandem repeats analysis). It resulted in a clustering of 23.6% of the isolates and a rate of recent transmission of 14.1%. The clustered isolates mainly belonged to the Haarlem family (23.2%), followed by the Beij…	eng	Journal of clinical microbiology	J Clin Microbiol	7505564	2004	Jul		42	7	3046-51	Print	Karine Brudey	Brudey, K; Gordon, M; Moström, P; Svensson, L; Jonsson, B; Sola, C; Ridell, M; Rastogi, N	Unité de la Tuberculose et des Mycobactéries, Institut Pasteur de Guadeloupe, Morne Jolivière, BP 484, 97165 Pointe-à-Pitre, Cedex, Guadeloupe.	journal
	1		Czech republic	1				1	0	0	JRL				PubMed	329377	15508413		Molecular epidemiology of tuberculosis in Prague and South Moravia, Czech Republic: genetic analysis of Mycobacterium tuberculosis isolates by IS6110-RFLP fingerprinting and spoligotyping	To genetically characterize and compare Mycobacterium tuberculosis isolates among culture-confirmed TB cases in two regions in the Czech Republic in 1998.Consecutive M. tuberculosis isolates from 111 TB patients in Prague and 120 patients in the South Moravia region were genotyped using the standardized IS6110 Southern blot hybridization method and by spoligotyping.Eighty of the Prague patients (…	eng	Central European journal of public health	Cent Eur J Public Health	9417324	2004	Sep		12	3	141-50	Print	N E Kurepina	Kurepina, NE; Kreiswirth, BN; Shaskina, E; Driscoll, JR; Polanecký, V; Kozáková, B; Mezenský, L; Kubín, M	Public Health Research Institute, International Center for Public Health, Newark, NJ, USA.	journal
unclear	1		Bangledesh	1				1	0	0	JRL				PubMed	328829	15583277	10.1128/JCM.42.12.5528-5536.2004	Genotypic and phenotypic heterogeneity among Mycobacterium tuberculosis isolates from pulmonary tuberculosis patients	Although the heterogeneity of Mycobacterium tuberculosis populations and the existence of mixed infections are now generally accepted, systematic studies on their relative importance are rare. In the present study, 10 individual colonies of each M. tuberculosis isolate (primary isolate) from 97 tuberculosis patients in a primarily human immunodeficiency virus-negative population were screened for…	eng	Journal of clinical microbiology	J Clin Microbiol	7505564	2004	Dec		42	12	5528-36	Print	Isdore Chola Shamputa	Shamputa, IC; Rigouts, L; Eyongeta, LA; El Aila, NA; van Deun, A; Salim, AH; Willery, E; Locht, C; Supply, P; Portaels, F	Mycobacteriology Unit, Department of Microbiology, Prince Leopold Institute of Tropical Medicine, Nationalestraat 155, B-2000 Antwerp, Belgium. icshamputa@itg.be	journal
	1		Cameroon	1				1	0	0	JRL				PubMed	328048	12791879		Genetic biodiversity of Mycobacterium tuberculosis complex strains from patients with pulmonary tuberculosis in Cameroon	We analyzed DNA polymorphisms in 455 Mycobacterium tuberculosis complex isolates from 455 patients to evaluate the biodiversity of tubercle bacilli in Ouest province, Cameroon. The phenotypic and genotypic identification methods gave concordant results for 99.5% of M. tuberculosis isolates (413 strains) and for 90% of Mycobacterium africanum isolates (41 strains). Mycobacterium bovis was isolated…	eng	Journal of clinical microbiology	J Clin Microbiol	7505564	2003	Jun		41	6	2547-53	Print	Sara Ngo Niobe-Eyangoh	Niobe-Eyangoh, SN; Kuaban, C; Sorlin, P; Cunin, P; Thonnon, J; Sola, C; Rastogi, N; Vincent, V; Gutierrez, MC	Laboratoire des Mycobactéries, Centre Pasteur, Yaoundé, Cameroon.	journal
	1	do not report strain type	Philippines	0	1	This study mixed up with 12682140		1	0	0	JRL				PubMed	358485	12791915		Characterization of the Manila family of Mycobacterium tuberculosis	Forty-eight Mycobacterium tuberculosis strains were obtained from patients living in metropolitan Manila, Republic of the Philippines. Three molecular typing methods, IS6110 restriction fragment length polymorphism, spoligotyping, and DNA sequencing of the oxyR, gyrA, and katG loci, established that these strains have restricted diversity and are members of a related genetic group of organisms. C…	eng	Journal of clinical microbiology	J Clin Microbiol	7505564	2003	Jun		41	6	2723-6	Print	James T Douglas	Douglas, JT; Qian, L; Montoya, JC; Musser, JM; Van Embden, JD; Van Soolingen, D; Kremer, K	Department of Microbiology, University of Hawaii, Honolulu, Hawaii 96822, USA. jdouglas@hawaii.edu	journal
rflp	1		USA	1				1	0	0	KEW				PubMed	328824	12453359	10.3201/eid0811.020313	Genotype analysis of Mycobacterium tuberculosis isolates from a sentinel surveillance population	As part of the National Tuberculosis and Genotyping Surveillance Network, isolates obtained from all new cases of tuberculosis occurring in seven geographically separate surveillance sites from 1996 through 2000 were genotyped. A total of 10883 isolates were fingerprinted by the IS6110-restriction fragment length polymorphism method, yielding 6128 distinct patterns. Low-copy isolates (those with …	eng	Emerging infectious diseases	Emerg Infect Dis	9508155	2002	Nov		8	11	1294-302	Print	Lauren S Cowan	Cowan, LS; Crawford, JT	Centers for Disease Control and Prevention, Atlanta, GA 30333, USA.	journal
	1		Madagascar	1				1	0	0	KEW				Scopus	329900	2-s2.0-77954352415	10.1128/CVI.00049-10	Variation in gamma interferon responses to different infecting strains of Mycobacterium tuberculosis in acid-fast bacillus smear-positive patients and household contacts in Antananarivo, Madagascar	The majority of healthy individuals exposed to Mycobacterium tuberculosis will not develop tuberculosis (TB), though many may become latently infected. More precise measurement of the human immune response to M. tuberculosis infection may help us understand this difference and potentially identify those subjects most at risk of developing active disease. Gamma interferon (IFN-γ) production has be…	English	Clinical and Vaccine Immunology
	1		Venezuela	1				1	0	0	KEW				Scopus	329907	2-s2.0-78649790716		Molecular epidemiology of mycobacterium tuberculosis in the Amazonas state (Venezuela)	Venezuela has a moderate incidence of Tuberculosis (TB), while the Amazons State is one with the highest incidence in the country. To obtain a better knowledge of the regional TB epidemiology, 100 isolates of Mycobacterium tuberculosis were collected in the Amazons State between January 1998 and June 2004. Isolates were analyzed through spoligotyping and relationated with geographical and ethnics…	Spanish	Acta Cientifica Venezolana
	1		Mongolia	1				1	0	0	KEW				Scopus	329914	2-s2.0-84856457373	10.3103/S0891416811040033	Structure of the m. tuberculosis population in mongolia according to the results of genotyping of large-sequence polymorphisms	We performed genotyping of 112 tuberculosis agent isolates from patients suffering from lung tuberculosis in Mongolia using the RD9, RD7, TbD1, RD105, and RD750 loci. Genotypes of all the obtained isolates were characterized by preservation of the RD9, RD7, and RD750 loci and by a deletion in the locus TbD1. A deletion of RD105 was found in 65 (58%) isolates. The isolates were classified into two…	English	Molecular Genetics, Microbiology and Virology
	1	received from Raul Diaz	Cuba	1				1	0	0	KEW				Scopus	329913	2-s2.0-84942311837		Spacer oligonucleotide typing of mycobacterium tuberculosis in Cuba	Introduction: Knowledge about Mycobacterium tuberculosis lineages is important to understand the origin, evolution and spread of this bacterium. Objective: Determine the genetic patterns of M. tuberculosis circulating in Cuba. Methods: A descriptive cross-sectional study was conducted with an analytical component in Cuba in the period extending from January 2009 to December 2010. Spacer oligonucl…	Spanish	Revista Cubana de Medicina Tropical
	1	Beijing/non-Beijing available by region	China	1				1	0	0	KEW				Scopus	328674	2-s2.0-85020023694	10.1155/2017/2505172	First Insight into the Molecular Epidemiology of Mycobacterium tuberculosis Isolates from the Minority Enclaves of Southwestern China	Yunnan is a province located in southwestern China. The aim of this study was to investigate the genetic diversity of Mycobacterium tuberculosis (MTB) strains circulating in Yunnan Province. We used spoligotyping and a 12-locus high-resolution VNTR set to identify a total of 271 MTB isolates collected from six prefectures' Yunnan. All the 271 patients were classified as 11 different ethnic groups…	English	BioMed Research International
	1		England	1				1	0	0	KEW				Scopus	329730	2-s2.0-85020465820	10.1186/s12916-017-0864-y	Recent household transmission of tuberculosis in England, 2010-2012: Retrospective national cohort study combining epidemiological and molecular strain typing data	Background: We estimate the proportion of tuberculosis (TB) in England due to recent household transmission, identify factors associated with being a household transmitter, and investigate the impact that identification of a case has on time to treatment of subsequent cases. Methods: TB cases notified between 2010 and 2012 in England in the same household as another case were identified; 24 locus…	English	BMC Medicine
	1		Gabon	1				1	0	0	KEW				Scopus	329895	2-s2.0-85021287418	10.1128/JCM.02257-16	Use of GeneXpert remnants for drug resistance profiling and molecular epidemiology of tuberculosis in Libreville, Gabon	Multidrug-resistant (MDR) and extensively drug resistant (XDR) strains of Mycobacterium tuberculosis pose major problems for global health. The GeneXpert MTB/RIF (Xpert) assay rapidly detects resistance to rifampin (RIFr), but for detection of the additional resistance that defines MDR-TB (MDR tuberculosis) and XDR-TB, and for molecular epidemiology, specimen cultures and a biosafe infrastructure…	English	Journal of Clinical Microbiology
	1	Duplicate study from Tukvadze et al. 216	Georgia	0				1	0	0	KEW				PubMed	358571	2-s2.0-85023185389	10.1186/s12879-017-2594-3	Pyrazinamide resistance-conferring mutations in pncA and the transmission of multidrug resistant TB in Georgia	Background: The ongoing epidemic of multidrug-resistant tuberculosis (MDR-TB) in Georgia highlights the need for more effective control strategies. A new regimen to treat MDR-TB that includes pyrazinamide (PZA) is currently being evaluated and PZA resistance status will largely influence the success of current and future treatment strategies. PZA susceptibility testing was not routinely performed…	English	BMC Infectious Diseases
	1		Taiwan	1				1	1	0	KEW				Scopus	328579	2-s2.0-85024386369	10.1038/s41598-017-05674-6	Combining molecular typing and spatial pattern analysis to identify areas of high tuberculosis transmission in a moderate-incidence county in Taiwan	In total, 303 randomly selected clinical Mycobacterium tuberculosis (MTB) isolates from 303 patients (collected January to December 2012) in central Taiwan were examined. The major lineages found were Beijing (N = 114, 37.62%), Haarlem (N = 76, 25.08%) and East African-Indian (EAI) (N = 42, 13.86%). Notably, younger persons (≤30 years old) were 6.58 times more likely to be infected with a Beijing…	English	Scientific Reports
	1		Iran	1				1	0	0	KEW				Scopus	329912	2-s2.0-85026452699	10.5812/jjm.39568	Genetic diversity of Mycobacterium tuberculosis complex isolated from patients in the Northeast of Iran by MIRU-VNTR and spoligotyping	Background: Molecular typing techniques are reliable tools for epidemiological study of tuberculosis because of their power in detecting recent transmission and differentiating reinfection and relapses. Objectives: The present study investigated epidemiological diversity among Mycobacterium tuberculosis strains circulating in three Khorasan provinces, Iran, using 12-loci MIRU-VNTR and spoligotypi…	English	Jundishapur Journal of Microbiology
	1		India	1				1	0	0	KEW				Scopus	329902	2-s2.0-85027864391	10.1016/j.tube.2017.08.002	Whole genome sequencing of clinical strains of Mycobacterium tuberculosis from Mumbai, India: A potential tool for determining drug-resistance and strain lineage	Amplification of drug resistance in Mycobacterium tuberculosis (M.tb) and its transmission are significant barriers in controlling tuberculosis (TB) globally. Diagnostic inaccuracies and delays impede appropriate drug administration, which exacerbates primary and secondary drug resistance. Increasing affordability of whole genome sequencing (WGS) and exhaustive cataloguing of drug resistance muta…	English	Tuberculosis
	1		Chad	1				1	0	0	KEW				Scopus	328640	2-s2.0-85027996248	10.1186/s12879-017-2671-7	Emergence and clonal transmission of multi-drug-resistant tuberculosis among patients in Chad	Background: Emergence of Multidrug-resistant (MDR) strains constitutes a significant public health problem worldwide. Prevalence of MDR tuberculosis from Chad is unavailable to date. Methods: We collected samples from consecutive TB patients nationwide in the seven major cities of Chad between 2007 and 2012 to characterize drug resistance and the population structure of circulating Mycobacterium …	English	BMC Infectious Diseases
hospital	1		Portugal	1				1	0	0	JRL				PubMed	329416	15300309		[Molecular identification using Spoligotyping of strains from the Mycobacterium tuberculosis complex isolated from the Hospital Fernando Fonseca]	Spoligotyping was used in the genotyping of 219 isolates of the Mycobacterium tuberculosis complex, from patients of the Hospital Fernando Fonseca. This technique, based on PCR methodology, analyses a region of the chromosome specific of the Mycobacterium tuberculosis complex, the DR locus (Direct Repeat). With the aid of an international database, we showed that the predominant Spoligotypes belo…	por	Revista portuguesa de pneumologia	Rev Port Pneumol	9813736	NA		2004 May-Jun	10	3	195-204	Print	Suzana David	David, S; Portugal, C; Antunes, A; Cardoso, A; Calado, A; Barros, V; Sancho, L	Unidade de Ensino e Investigação (UEI) de Micobacteriologia, Instituto de Higiene e Medicina Tropical (IHMT)/Universidade Nova de Lisboa (UNL).	journal
	1		Iran	1				1	0	0	JRL				PubMed	328555	19736398	10.4103/0255-0857.55441	Beijing genotype and other predominant Mycobacterium tuberculosis spoligotypes observed in Mashhad city, Iran	The purpose of this study was to understand the molecular epidemiology of tuberculosis in Khorasan province of Iran was studied by spoligotyping 113 Mycobacterium tuberculosis isolates. The spoligotyping results were in comparison to the word Spoligotyping Database of Institute Pasteur de Guadeloupe (SpolDB4). Spoligotyping data from Iran has rarely been described and there is limited information…	eng	Indian journal of medical microbiology	Indian J Med Microbiol	8700903	NA		2009 Oct-Dec	27	4	306-10	Internet	M Rohani	Rohani, M; Farnia, P; Nasab, MN; Moniri, R; Torfeh, M; Amiri, MM	Department of Microbiology and Immunology , Kashan University of Medical Sciences, P.O. Box: 87155-111, Iran. kia_rohani@yahoo.com	journal
	1		India	1				1	0	0	LPW				PubMed	328531	23183476	10.4103/0255-0857.103774	A pilot study to determine genetic polymorphism in Mycobacterium tuberculosis isolates in Central India	This study was carried out to identify predominant spoligotypes responsible for transmission and prevalence of tuberculosis in central India since there is no data available about the genetic biodiversity of Mycobacterium tuberculosis isolates from patients with tuberculosis in this region. 35 strains of Mycobacterium tuberculosis were subjected to spoligotyping according to the standard protocol…	eng	Indian journal of medical microbiology	Indian J Med Microbiol	8700903	NA		2012 Oct-Dec	30	4	470-3	Internet	P Desikan	Desikan, P; Chauhan, DS; Sharma, P; Panwalkar, N; Gautam, S; Katoch, VM	Department of Microbiology, Bhopal Memorial Hospital and Research Centre, Raisen Bypass Road, Karond, Bhopal, India.	journal
	1		Mexico	1				1	1	0	KEW				PubMed	328525	28317799	10.4103/2212-5531.201886	A first insight into the genetic diversity of Mycobacterium Tuberculosis in Veracruz, Mexico	Tuberculosis (TB) remains one of the most important infectious diseases. Although Mexico is one of the Latin American countries with the largest contribution to these statistics, there are few reports that describe the genotypic characteristics of TB. The aim of this study was to use the MIRU-VNTR-24 loci to analyze the genetic diversity of M. tuberculosis circulating in the state of Veracruz, Me…	eng	International journal of mycobacteriology	Int J Mycobacteriol	101615660	NA		2017 Jan-Mar	6	1	14-20	Internet	Raquel Almaraz-Velasco	Almaraz-Velasco, R; Munro-Rojas, D; Fuentes-Domínguez, J; Muñiz-Salazar, R; Ibarra-Estela, MA; Guevara-Méndez, AD; Chaparro-Martinez, RI; Perez-Navarro, M; Zenteno-Cuevas, R	Ecology and Health Laboratory, Public Health Institute, University of Veracruz, Xalapa, México.	journal
			Papua New Guinea	1				1	0	0	KEW				Additional	342567	25476850
			Botswana	1				1	0	0	KEW				Additional	341857	bot_strains_01
		more detailed location data available	Ethiopia	1				1	0	0	KEW				Additional	336191	eth_strains_01
			India	1				1	0	0	KEW				Additional	336192	ind_strains_01
			Kenya	1				1	0	0	KEW				Additional	341840	ken_strains_01	http://www.ajhsjournal.or.ke/admin/current/c1xoBHIOuPQ.pdf		Diversity of Mycobacterium tuberculosis strains in Nairobi, Kenya.		The African Journal of Health Sciences
		1	Mexico	1				1	0	0	KEW				Additional	334975	mex_strains_01
			Nepal	1				1	0	0	KEW				Additional	341859	nep_strains_01
		1	Panama	1				1	0	0	KEW				Additional	334937	pan_strains_01
	1	Territory	French Polynesia	0			Convenience sample	0	0	0	LPW				PubMed		26271142	10.1016/j.jmii.2015.05.018	Diversity of Mycobacterium tuberculosis lineages in French Polynesia	French Polynesia is an overseas territory located in the South Pacific. The incidence of tuberculosis in French Polynesia has been stable since 2000 with an average of 20 cases/y/100,000 inhabitants. Molecular epidemiology of Mycobacterium tuberculosis in French Polynesia is unknown because M. tuberculosis isolates have not been routinely genotyped.From 2009 to 2012, 34 isolates collected from 32…	eng	Journal of microbiology, immunology, and infection = Wei mian yu gan ran za zhi	J Microbiol Immunol Infect	100956211	2017	Apr		50	2	199-206	Internet	Djaltou Aboubaker Osman	Osman, DA; Phelippeau, M; Drancourt, M; Musso, D	Unité de Recherche sur les Maladies Infectieuses et Tropicales Emergentes (URMITE), UMR CNRS 7278, IRD 198, INSERM 1095, Faculté de Médecine, Marseille, France; Institut de Recherche Médicinale (IRM), Centre d'études et de Recherche de Djibouti (CERD), Djibouti.	journal
unclear	1	resist	Iran	0			Drug resistant strains only	0	0	0	KEW				PubMed		27380108	10.1080/1120009X.2016.1169619	Screening for streptomycin resistance conferring mutations in Mycobacterium tuberculosis isolates from Iran	Point mutations in the rpsL and rrs genes can lead to development of streptomycin (STR) resistance in Mycobacterium tuberculosis. The aims of this study were to determine the frequency of mutations in STR resistant M. tuberculosis isolates in Iran and to analyze the possible relationship between bacterial genotype and STR resistance. Twenty-three M. tuberculosis samples comprising 9 multidrug-res…	eng	Journal of chemotherapy (Florence, Italy)	J Chemother	8907348	2017	Feb		29	1	14-18	Internet	Faranak Rezaei	Rezaei, F; Haeili, M; Imani Fooladi, A; Azari Garmjan, GA; Feizabadi, MM	a Department of Microbiology, School of Medicine , Tehran University of Medical Sciences , Tehran , Iran.	journal
unclear	1	unclear or convenience sampling method	Myanmar	0			Unclear sampling method	0	0	0	KEW	requested clarification of sampling methods 11/3/17	"The case-finding strategy for MDR-TB in Myanmar until 2013 was that sputum samples were collected from patients with presumptive MDR-TB at TB clinics across Myanmar and sent to the National TB Reference Laboratory (NTRL), Yangon for Line Probe Assay and phenotypic drug susceptibility testing (DST) of isoniazid, rifampicin, ethambutol, and streptomycin. For this study, we selected sputum samples …	Exclude, but follow up about other potential data in Myanmar	PubMed		27644269	10.1080/23744235.2016.1231419	Genotypic diversity of Mycobacterium tuberculosis strains in Myanmar		eng	Infectious diseases (London, England)	Infect Dis (Lond)	101650235	2017	Mar		49	3	237-239	Internet	Thanda Tun	Tun, T; Aye, KS; Nyunt, WW; Crump, JA; Nakajima, C; Suzuki, Y; Thinn, KK; Cook, GM; Aung, HL	a National Health Laboratory , Ministry of Health and Sports , Yangon , Myanmar.	journal
	1	unclear or convenience sampling method	Iran	0			Unclear sampling method	0	0	0	KEW				PubMed		27743106	10.1007/s00284-016-1145-2	Genetic Lineages of Mycobacterium tuberculosis Isolates in Isfahan, Iran	In this study, we aimed to identify the genetic lineages of Mycobacterium tuberculosis isolates in Isfahan via the mycobacterial interspersed repetitive-unit-variable number tandem repeat typing method based on 15 loci. Forty-nine M. tuberculosis isolates were collected between 2013 and 2015 from Tuberculosis patients in Mollahadi Sabzevari Tuberculosis Center in Isfahan. All isolates were typed …	eng	Current microbiology	Curr Microbiol	7808448	2017	Jan		74	1	14-21	Internet	Fatemeh Riyahi Zaniani	Riyahi Zaniani, F; Moghim, S; Mirhendi, H; Ghasemian Safaei, H; Fazeli, H; Salehi, M; Nasr Esfahani, B	Department of Microbiology, Faculty of Medicine, Isfahan University of Medical Sciences, Esfah?n, Iran.	journal
	1	case-contact study	USA	0			Case study	0	0	0	KEW				PubMed		27866489	10.1017/S0950268816002399	Exploring genotype concordance in epidemiologically linked cases of tuberculosis in New York City	Comparing genotype results of tuberculosis (TB) isolates from individuals diagnosed with TB can support or refute transmission; however, these conclusions are based upon the criteria used to define a genotype match. We used a genotype-match definition which allowed for variation in IS6110 restriction fragment length polymorphism (RFLP) to support transmission between epidemiologically linked pers…	eng	Epidemiology and infection	Epidemiol Infect	8703737	2017	Feb		145	3	503-514	Internet	R S Robbins	Robbins, RS; Perri, BR; Ahuja, SD; Anger, HA; Sullivan Meissner, J; Shashkina, E; Kreiswirth, BN; Proops, DC	New York City Department of Health and Mental Hygiene,New York,NY,USA.	journal
wgs	1	resist	Belarus	0			Drug resistant strains only	0	0	0	KEW				PubMed		27903602	10.1128/JCM.02116-16	Whole-Genome Sequencing of Mycobacterium tuberculosis Provides Insight into the Evolution and Genetic Composition of Drug-Resistant Tuberculosis in Belarus	The emergence and spread of drug-resistant Mycobacterium tuberculosis (DR-TB) are critical global health issues. Eastern Europe has some of the highest incidences of DR-TB, particularly multidrug-resistant (MDR) and extensively drug-resistant (XDR) TB. To better understand the genetic composition and evolution of MDR- and XDR-TB in the region, we sequenced and analyzed the genomes of 138 M. tuber…	eng	Journal of clinical microbiology	J Clin Microbiol	7505564	2017	Feb		55	2	457-469	Internet	Kurt R Wollenberg	Wollenberg, KR; Desjardins, CA; Zalutskaya, A; Slodovnikova, V; Oler, AJ; Quiñones, M; Abeel, T; Chapman, SB; Tartakovsky, M; Gabrielian, A; Hoffner, S; Skrahin, A; Birren, BW; Rosenthal, A; Skrahina, A; Earl, AM	Office of Cyber Infrastructure & Computational Biology, National Institute of Allergy and Infectious Disease, National Institutes of Health, Bethesda, Maryland, USA.	journal
	1	MDRTB only	China	0			Drug resistant strains only	0	0	0	LPW				PubMed		27919643	10.1016/S1473-3099(16)30418-2	Transmission of multidrug-resistant Mycobacterium tuberculosis in Shanghai, China: a retrospective observational study using whole-genome sequencing and epidemiological investigation	Multidrug-resistance is a substantial threat to global elimination of tuberculosis. Understanding transmission patterns is crucial for control of the disease. We used a genomic and epidemiological approach to assess recent transmission of multidrug-resistant (MDR) tuberculosis and identify potential risk factors for transmission.We did a population-based, retrospective study of patients who teste…	eng	The Lancet. Infectious diseases	Lancet Infect Dis	101130150	2017	Mar		17	3	275-284	Internet	Chongguang Yang	Yang, C; Luo, T; Shen, X; Wu, J; Gan, M; Xu, P; Wu, Z; Lin, S; Tian, J; Liu, Q; Yuan, Z; Mei, J; DeRiemer, K; Gao, Q	The Key Laboratory of Medical Molecular Virology of Ministries of Education and Health, Institutes of Biomedical Sciences and Institute of Medical Microbiology, School of Basic Medical Science, Fudan University, Shanghai, China; Department of Epidemiology of Microbial Diseases, School of Public Health, Yale University, New Haven, CT, USA.	journal
	1		China	1	0	Only tested or reported results for Beijing lineage	Did not test or report all genotypes	0	0	0	LPW				PubMed	328835	27919887	10.1128/AAC.02170-16	Genotyping and Prevalence of Pyrazinamide- and Moxifloxacin-Resistant Tuberculosis in China, 2000 to 2010	We investigated the prevalence, trends, and risk factors for pyrazinamide (PZA) and moxifloxacin (MOX) resistance among tuberculosis (TB) cases in China and also analyzed the population structure of Mycobacterium tuberculosis strains. All the M. tuberculosis strains enrolled in this study were collected from the national TB prevalence surveys. Each strain was genotyped by analyzing the regions of…	eng	Antimicrobial agents and chemotherapy	Antimicrob Agents Chemother	315061	2017	Feb		61	2		Internet	Yu Pang	Pang, Y; Zhang, Z; Wang, Y; Wang, S; Song, Y; Zhao, B; Zhou, Y; Ou, X; Li, Q; Xia, H; Zheng, Y; Fang, X; Zhao, Y	National Center for Tuberculosis Control and Prevention, Chinese Center for Disease Control and Prevention, Beijing, China.	journal
	1	unclear sampling method	Iran	0			Unclear sampling method	0	0	0	LPW				PubMed		28034830	10.1016/j.micpath.2016.12.025	Pros and cons of direct genotyping on tuberculosis clinical samples	Prompt genotyping of Mycobacterium tuberculosis (M. tuberculosis) is crucial for improving molecular epidemiological investigation of tuberculosis (TB).We performed a retrospective study to evaluate the use of 24 loci MIRU-VNTR (mycobacterial interspersed repetitive unit-variable number of tandem-repeat) directly on 135 clinical samples from 84 TB patients.There was a direct correlation between g…	eng	Microbial pathogenesis	Microb Pathog	8606191	2017	Feb		103		135-138	Internet	Hamidreza Sadegh	Sadegh, H; Kargarpour Kamakoli, M; Farmanfarmaei, G; Masoumi, M; Abdolrahimi, F; Fateh, A; Ebrahimzadeh, N; Rahimi Jamnani, F; Vaziri, F; Siadat, SD	Department of Biology, Science and Research Branch, Islamic Azad University, Tehran, Iran.	journal
	1	resist	South Africa	0			Drug resistant strains only	0	0	0	KEW				PubMed		28099825	10.1056/NEJMoa1604544	Transmission of Extensively Drug-Resistant Tuberculosis in South Africa	Drug-resistant tuberculosis threatens recent gains in the treatment of tuberculosis and human immunodeficiency virus (HIV) infection worldwide. A widespread epidemic of extensively drug-resistant (XDR) tuberculosis is occurring in South Africa, where cases have increased substantially since 2002. The factors driving this rapid increase have not been fully elucidated, but such knowledge is needed …	eng	The New England journal of medicine	N Engl J Med	255562	2017	1		376	3	243-253	Internet	N Sarita Shah	Shah, NS; Auld, SC; Brust, JC; Mathema, B; Ismail, N; Moodley, P; Mlisana, K; Allana, S; Campbell, A; Mthiyane, T; Morris, N; Mpangase, P; van der Meulen, H; Omar, SV; Brown, TS; Narechania, A; Shaskina, E; Kapwata, T; Kreiswirth, B; Gandhi, NR	From the Emory University Rollins School of Public Health and School of Medicine (N.S.S., S.C.A., S.A., A.C., N.R.G.) and the Centers for Disease Control and Prevention (N.S.S.) - both in Atlanta; Albert Einstein College of Medicine and Montefiore Medical Center (N.S.S., J.C.M.B., N.R.G.), Columbia University Mailman School of Public Health (B.M., T.S.B.), and the American Museum of Natural Histo…	journal
	1	only genotyped clusters	Austria, Romania, Germany	0			Clusters only	0	0	0	KEW				PubMed		28106529	10.2807/1560-7917.ES.2017.22.2.30439	A joint cross-border investigation of a cluster of multidrug-resistant tuberculosis in Austria, Romania and Germany in 2014 using classic, genotyping and whole genome sequencing methods: lessons learnt	Molecular surveillance of multidrug-resistant tuberculosis (MDR-TB) using 24-loci MIRU-VNTR in the European Union suggests the occurrence of international transmission. In early 2014, Austria detected a molecular MDR-TB cluster of five isolates. Links to Romania and Germany prompted the three countries to investigate possible cross-border MDR-TB transmission jointly. We searched genotyping databa…	eng	Euro surveillance : bulletin Europeen sur les maladies transmissibles = European communicable disease bulletin	Euro Surveill	100887452	2017	Jan		22	2		Internet	Lena Fiebig	Fiebig, L; Kohl, TA; Popovici, O; Mühlenfeld, M; Indra, A; Homorodean, D; Chiotan, D; Richter, E; Rüsch-Gerdes, S; Schmidgruber, B; Beckert, P; Hauer, B; Niemann, S; Allerberger, F; Haas, W	Respiratory Infections Unit, Department for Infectious Disease Epidemiology, Robert Koch Institute, Berlin, Germany.	journal
	1	Drug resistant patients only	South Africa	0			Drug resistant strains only	0	0	0	LPW				PubMed		28109869	10.1016/S2213-2600(16)30433-7	Outcomes, infectiousness, and transmission dynamics of patients with extensively drug-resistant tuberculosis and home-discharged patients with programmatically incurable tuberculosis: a prospective cohort study	The emergence of programmatically incurable tuberculosis threatens to destabilise control efforts. The aim of this study was to collect prospective patient-level data to inform treatment and containment strategies.In a prospective cohort study, 273 South African patients with extensively drug-resistant tuberculosis, or resistance beyond extensively drug-resistant tuberculosis, were followed up ov…	eng	The Lancet. Respiratory medicine	Lancet Respir Med	101605555	2017	Apr		5	4	269-281	Internet	Keertan Dheda	Dheda, K; Limberis, JD; Pietersen, E; Phelan, J; Esmail, A; Lesosky, M; Fennelly, KP; Te Riele, J; Mastrapa, B; Streicher, EM; Dolby, T; Abdallah, AM; Ben-Rached, F; Simpson, J; Smith, L; Gumbo, T; van Helden, P; Sirgel, FA; McNerney, R; Theron, G; Pain, A; Clark, TG; Warren, RM	Division of Pulmonology and UCT Lung Institute, University of Cape Town, Cape Town, South Africa. Electronic address: keertan.dheda@uct.ac.za.	journal
hospital	1	insufficient strain data	Iran	0			Strain data insufficient or unavailable	0	0	0	KEW				PubMed		28120910	10.1038/srep41410	Evaluation of the impact of polyclonal infection and heteroresistance on treatment of tuberculosis patients	Mixed strain infections of Mycobacterium tuberculosis make diagnosis, treatment, and control of tuberculosis (TB) more difficult. This study was aimed to evaluate the relationship between mixed infections, antibiotic resistance patterns and treatment of TB patients. In this study, among 2850 suspected TB clinical samples, a total of ninety-six clinical samples from 66 TB confirmed patients were s…	eng	Scientific reports	Sci Rep	101563288	2017	Jan		7		41410	Internet	Mansour Kargarpour Kamakoli	Kargarpour Kamakoli, M; Sadegh, HR; Farmanfarmaei, G; Masoumi, M; Fateh, A; Javadi, G; Rahimi Jamnani, F; Vaziri, F; Siadat, SD	Department of Biology, Science and Research Branch, Islamic Azad University, Tehran, Iran.	journal
	1	strain data not reported	Israel	0			Strain data insufficient or unavailable	0	0	0	KEW	requested data associated with this study 11/3/17	Initial response and introduction to National Reference Lab, but did not receive data	Exclude	PubMed		28201993	10.1186/s12864-017-3560-6	Structure and variation of CRISPR and CRISPR-flanking regions in deleted-direct repeat region Mycobacterium tuberculosis complex strains	CRISPR and CRISPR-flanking genomic regions are important for molecular epidemiology of Mycobacterium tuberculosis complex (MTBC) strains, and potentially for adaptive immunity to phage and plasmid DNA, and endogenous roles in the bacterium. Genotyping in the Israel National Mycobacterium Reference Center Tel-Aviv of over 1500 MTBC strains from 2008-2013 showed three strains with validated negativ…	eng	BMC genomics	BMC Genomics	100965258	2017	Feb		18	1	168	Internet	Paul Jeffrey Freidlin	Freidlin, PJ; Nissan, I; Luria, A; Goldblatt, D; Schaffer, L; Kaidar-Shwartz, H; Chemtob, D; Dveyrin, Z; Head, SR; Rorman, E	National Mycobacterium Reference Center, National Public Health Laboratory Tel Aviv, Ministry of Health, Tel Aviv, Israel. paul.freidlin@phlta.health.gov.il.	journal
	1	beijing vs. non-beijing only, unclear or convenience sampling method	Japan	0			Did not test or report all genotypes	0	0	0	KEW				PubMed		28221133	10.3201/eid2303.161571	Mycobacterium tuberculosis Transmission among Elderly Persons, Yamagata Prefecture, Japan, 2009-2015	In many countries with low to moderate tuberculosis (TB) incidence, cases have shifted to elderly persons. It is unclear, however, whether these cases are associated with recent Mycobacterium tuberculosis transmission or represent reactivation of past disease. During 2009-2015, we performed a population-based TB investigation in Yamagata Prefecture, Japan, using in-depth contact tracing and 24-lo…	eng	Emerging infectious diseases	Emerg Infect Dis	9508155	2017	Mar		23	3	448-455	Internet	Junji Seto	Seto, J; Wada, T; Suzuki, Y; Ikeda, T; Mizuta, K; Yamamoto, T; Ahiko, T		journal
hospital	1	method	0	0			Method	0	0	0	KEW				PubMed		28275074	10.1128/JCM.02483-16	Same-Day Diagnostic and Surveillance Data for Tuberculosis via Whole-Genome Sequencing of Direct Respiratory Samples	Routine full characterization of Mycobacterium tuberculosis is culture based, taking many weeks. Whole-genome sequencing (WGS) can generate antibiotic susceptibility profiles to inform treatment, augmented with strain information for global surveillance; such data could be transformative if provided at or near the point of care. We demonstrate a low-cost method of DNA extraction directly from pat…	eng	Journal of clinical microbiology	J Clin Microbiol	7505564	2017	May		55	5	1285-1298	Internet	Antonina A Votintseva	Votintseva, AA; Bradley, P; Pankhurst, L; Del Ojo Elias, C; Loose, M; Nilgiriwala, K; Chatterjee, A; Smith, EG; Sanderson, N; Walker, TM; Morgan, MR; Wyllie, DH; Walker, AS; Peto, TEA; Crook, DW; Iqbal, Z	Nuffield Department of Clinical Medicine, University of Oxford, John Radcliffe Hospital, Oxford, United Kingdom a.votintseva@gmail.com zam@well.ox.ac.uk.	journal
	1	Sampling method unclear	India	0			Unclear sampling method	0	0	0	LPW				PubMed		28303834	10.4103/ijmm.IJMM_16_12	Trends in spoligotype patterns of Mycobacterium tuberculosis strains in central India	This study aims to understand trends in spoligotype patterns of Mycobacterium tuberculosis (MTB) in Central India. Elucidation of these trends may provide baseline information to understand the transmission dynamics of strains of MTB in the region. Spoligotyping was carried out on 340 MTB strains isolated from clinical samples received from 2007 to 2011. The prevalence of ST26/CAS1_Del, ST11/EAI3…	eng	Indian journal of medical microbiology	Indian J Med Microbiol	8700903	2017		2017 Jan-Mar	35	1	129-133	Internet	Prabha Desikan	Desikan, P; Chauhan, DS; Panwalkar, N; Sharma, P; Yadav, P	Department of Microbiology, NRL, Bhopal Memorial Hospital and Research Centre, Bhopal, Madhya Pradesh, India.	journal
	1	unclear or convenience sampling method	China	0			Unclear sampling method	0	0	0	KEW				PubMed		28337447	10.1155/2017/3179535	Genotypic Diversity of Mycobacterium tuberculosis Clinical Isolates in the Multiethnic Area of the Xinjiang Uygur Autonomous Region in China	Objectives. We studied the genetic diversity of clinical isolates from patients with tuberculosis in the multiethnic area of Xinjiang autonomous region in China. A total of 311 clinical M. tuberculosis isolates were collected in 2006 and 2011 and genotyped by two genotyping methods. All isolates were grouped into 68 distinct spoligotypes using the spoligotyping method. The Beijing family was domi…	eng	BioMed research international	Biomed Res Int	101600173	2017			2017		3179535	Internet	Jie Liu	Liu, J; Li, J; Liu, J; Zhao, X; Lian, L; Liu, H; Lu, B; Yu, Q; Zhang, J; Qi, Y; Wan, K	National Institute for Communicable Disease Control and Prevention, Chinese Center for Disease Control and Prevention, State Key Laboratory for Infectious Disease Prevention and Control, Beijing 102206, China; Collaborative Innovation Center for Diagnosis and Treatment of Infectious Diseases, Hangzhou 310003, China; Chaoyang Center for Disease Control and Prevention, Beijing, 100021, China.	journal
	1	not representative of any one geographic location	Various	0			Convenience sample	0	0	0	KEW				PubMed		28351427	10.1186/s12916-017-0834-4	Use of whole-genome sequencing to distinguish relapse from reinfection in a completed tuberculosis clinical trial	RIFAQUIN was a tuberculosis chemotherapy trial in southern Africa including regimens with high-dose rifapentine with moxifloxacin. Here, the application of whole-genome sequencing (WGS) is evaluated within RIFAQUIN for identifying new infections in treated patients as either relapses or reinfections. WGS is further compared with mycobacterial interspersed repetitive units-variable number tandem r…	eng	BMC medicine	BMC Med	101190723	2017	Mar		15	1	71	Internet	Adam A Witney	Witney, AA; Bateson, AL; Jindani, A; Phillips, PP; Coleman, D; Stoker, NG; Butcher, PD; McHugh, TD; ,	Institute for Infection and Immunity, St George's University of London, London, UK. awitney@sgul.ac.uk.	journal
	1	article duplicated at 2824967	Ethiopia	0			Duplicate	0	0	0	KEW				PubMed		28377803	10.1016/j.nmni.2017.02.003	Mycobacterium tuberculosis in central Ethiopia: drug sensitivity patterns and association with genotype	Drug resistance tuberculosis (TB) and the emergence of multidrug resistant (MDR) isolates are significant concerns regarding TB control programs in several countries. This study was undertaken to evaluate the drug sensitivity of Mycobacterium tuberculosis and to assess its association with strains and lineages of M. tuberculosis. A total of 279 M. tuberculosis strains isolated from Central Ethiop…	eng	New microbes and new infections	New Microbes New Infect	101624750	2017	May		17		69-74	Print	Z Bedewi	Bedewi, Z; Mekonnen, Y; Worku, A; Medhin, G; Zewde, A; Yimer, G; Pieper, R; Ameni, G	Aklilu Lemma Institute of Pathobiology, Addis Ababa, Ethiopia; College of Natural Sciences, Microbial, Cellular and Molecular Biology Department, Addis Ababa, Ethiopia; Department of Biology, College of Natural Science and Computational Science, Hawassa University, Hawassa, Ethiopia.	journal
	1		Iran	0			Strain data insufficient or unavailable	0	0	0	KEW				PubMed		28386470	10.1556/1886.2016.00033	Determining the Risk of Intra-Community Transmission of Tuberculosis in the Northwest of Iran Through 15 Loci Miru-Vntr Typing	This study was carried out in order to investigating the effect of travelling on the transmission of tuberculosis from high- to low-burden TB countries. Mycobacteria samples isolated from patients of distinct and relatively co-related countries (Azerbaijan Republic and Tabriz [located in the northwest of Iran]) were analyzed through 15 loci MIRU-VNTR typing method. PCR was done using special prim…	eng	European journal of microbiology & immunology	Eur J Microbiol Immunol (Bp)	101569896	2017	Mar		7	1	46-54	Print	Ali Afaghi-Gharamaleki	Afaghi-Gharamaleki, A; Moaddab, S; Darbouy, M; Ansarin, K; Hanifian, S	Department of Microbiology Science and Research Branch, Islamic Azad University , Fars, Iran.	journal
	1	insufficient strain data	Australia	0			Strain data insufficient or unavailable	0	0	0	KEW				PubMed		28399970	10.5588/ijtld.16.0651	Recurrence of tuberculosis in a low-incidence setting without directly observed treatment: Victoria, Australia, 2002-2014	Victoria, Australia, is an industrialised setting with low tuberculosis (TB) incidence and universal health care. Individually tailored adherence support for self-administered daily anti-tuberculosis treatment is provided. Directly observed treatment (DOT) is very rarely used.To review the rate of recurrent TB in Victoria between 2002 and 2014.This was a retrospective cohort study. All recurrent …	eng	The international journal of tuberculosis and lung disease : the official journal of the International Union against Tuberculosis and Lung Disease	Int J Tuberc Lung Dis	9706389	2017	May		21	5	550-555	Internet	K D Dale	Dale, KD; Globan, M; Tay, EL; Trauer, JM; Trevan, PG; Denholm, JT	Victorian Tuberculosis Program, Parkville.	journal
	1	Resist	Thailand	0			Drug resistant strains only	0	0	0	KEW				PubMed		28416956	10.4046/trd.2017.80.2.159	Mutations in Streptomycin Resistance Genes and Their Relationship to Streptomycin Resistance and Lineage of Mycobacterium tuberculosis Thai Isolates	Streptomycin (SM) is recommended by the World Health Organization (WHO) as a part of standard regimens for retreating multidrug-resistant tuberculosis (MDR-TB) cases. The incidence of MDR-TB in retreatment cases was 19% in Thailand. To date, information on SM resistance (SMR) gene mutations correlated to the SMR of Mycobacterium tuberculosis Thai isolates is limited. In this study, the mutations …	eng	Tuberculosis and respiratory diseases	Tuberc Respir Dis (Seoul)	101479418	2017	Apr		80	2	159-168	Print	Yin Moe Hlaing	Hlaing, YM; Tongtawe, P; Tapchaisri, P; Thanongsaksrikul, J; Thawornwan, U; Archanachan, B; Srimanote, P	Graduate Program in Biomedical Sciences, Faculty of Allied Health Sciences, Thammasat University, Pathumthani, Thailand.	journal
	1	this data may be duplicated from 28333978	China	0			Duplicate	0	0	0	KEW				PubMed		28432321	10.1038/s41598-017-00720-9	Mycobacterium tuberculosis Lineage Distribution in Xinjiang and Gansu Provinces, China	Mycobacterium tuberculosis (M. tuberculosis) genotyping has dramatically improved the understanding of the epidemiology of tuberculosis (TB). In this study, 187 M. tuberculosis isolates from Xinjiang Uygur Autonomous Region (Xinjiang) and Gansu province in China were genotyped using large sequence polymorphisms (LSPs) and variable number tandem repeats (VNTR). Ten isolates, which represent major …	eng	Scientific reports	Sci Rep	101563288	2017	Apr		7	1	1068	Internet	Haixia Chen	Chen, H; He, L; Huang, H; Shi, C; Ni, X; Dai, G; Ma, L; Li, W	Zhejiang Provincial Key Laboratory for Technology and Application of Model Organisms, School of Laboratory Medicine and Life Science, Wenzhou Medical University, Wenzhou, 325035, China.	journal
	1	only reported genotype for clusters	Brazil	0			Clusters only	0	0	0	KEW				PubMed		28454653	10.1016/j.tube.2017.03.003	Strains of Mycobacterium tuberculosis transmitting infection in Brazilian households and those associated with community transmission of tuberculosis	Molecular epidemiologic studies have shown that the dynamics of tuberculosis transmission varies geographically. We sought to determine which strains of Mycobacterium tuberculosis (MTB) were infecting household contacts (HHC), and which were causing clusters of tuberculosis (TB) disease in Vitoria-ES, Brazil. A total of 741 households contacts (445 TST +) and 139 index cases were characterized ac…	eng	Tuberculosis (Edinburgh, Scotland)	Tuberculosis (Edinb)	100971555	2017	May		104		79-86	Internet	Solange Alves Vinhas	Vinhas, SA; Jones-López, EC; Ribeiro Rodrigues, R; Gaeddert, M; Peres, RL; Marques-Rodrigues, P; de Aguiar, PPL; White, LF; Alland, D; Salgame, P; Hom, D; Ellner, JJ; Dietze, R; Collins, LF; Shashkina, E; Kreiswirth, B; Palaci, M	Núcleo de Doenças Infecciosas (NDI), Universidade Federal do Espírito Santo (UFES), Vitória, Brazil.	journal
	1	Insufficient strain data, unclear method	Taiwan	0			Strain data insufficient or unavailable	0	0	0	KEW				PubMed		28469152	10.1038/s41598-017-01580-z	Lineage-specific SNPs for genotyping of Mycobacterium tuberculosis clinical isolates	Tuberculosis (TB) is a severe infectious disease worldwide. Genetic variation of the causative agent, Mycobacterium tuberculosis (MTB), determines the outcomes of infection and anti-TB treatment. Until recently, there has been no effective and convenient way for classifying clinical isolates based on the DNA sequences of the divergent lineages of MTB infecting human populations. Here, we identifi…	eng	Scientific reports	Sci Rep	101563288	2017	May		7	1	1425	Internet	Horng-Yunn Dou	Dou, HY; Lin, CH; Chen, YY; Yang, SJ; Chang, JR; Wu, KM; Chen, YT; Chin, PJ; Liu, YM; Su, IJ; Tsai, SF	Institute of Infectious Diseases and Vaccinology, National Health Research Institutes, Zhunan, Miaoli, Taiwan. hydou@nhri.org.tw.	journal
	1	not english	China	0			Not English	0	0	0	KEW				PubMed		28482417		[Molecular epidemiologic study on Mycobacterium tuberculosis from drug resistance monitoring sites of Guangdong Province, 2015]	Objective: To understand the characteristics of Mycobacterium tuberculosis (MTB) in epidemiology and distribution from Guangdong Province, and to explore the risk factors associated with drug resistance. Methods: A total of 225 clinical strains of MTB collected from 5 drug resistance monitoring sites of Guangdong Province in 2015 were tested by Regions of Difference 105 (RD105) deletion test and …	chi	Zhonghua jie he he hu xi za zhi = Zhonghua jiehe he huxi zazhi = Chinese journal of tuberculosis and respiratory diseases	Zhonghua Jie He He Hu Xi Za Zhi	8712226	2017	May		40	5	334-338	Print	X C Huang	Huang, XC; Guo, HX; Wu, ZH; Guo, CX; Wei, WJ; Li, HC; Sun, Q; Zhang, CC; Li, ZY; Chen, T; Zhong, Q; Zhou, L	Department of Provincial Reference Laboratory, Center for Tuberculosis Control of Guangdong Province, Guangzhou 510630, China.	journal
	1	resist	Saudi Arabia	0			Drug resistant strains only	0	0	0	KEW				PubMed		28500800	10.4269/ajtmh.16-0579	First Insight Into the Fluoroquinolone and Aminoglycoside Resistance of Multidrug-Resistant Mycobacterium tuberculosis in Saudi Arabia	AbstractIn Saudi Arabia, there were no nationwide screening studies conducted so far to determine the aminoglycoside and fluoroquinolone resistance among multidrug-resistant tuberculosis (MDR-TB) isolates. Therefore, as the first attempt in the country, a retrospective analysis has been conducted on a nationwide collection of 2,956 M. tuberculosis clinical isolates screened with phenotypic drug s…	eng	The American journal of tropical medicine and hygiene	Am J Trop Med Hyg	370507	2017	May		96	5	1066-1070	Internet	Bright Varghese	Varghese, B; Al-Hajoj, S	Mycobacteriology Research Section, Department of Infection and Immunity, King Faisal Specialist Hospital and Research Centre, Riyadh, Saudi Arabia.	journal
	1	Convenience sample	Ecuador	0			Convenience sample	0	0	0	KEW	requested full text	Received full text: convenience sample	Exclude, but follow up about other potential data in Ecuador	PubMed		28527287		[Identification of the Mycobacterium tuberculosis Beijing lineage in Ecuador]	Mycobacterium tuberculosis Beijing lineage isolates are considered to be especially virulent, transmissible and prone to acquire resistances. Beijing strains have been reported worldwide, but studies in Latin America are still scarce. The only multinational study performed in the region indicated a heterogeneous distribution for this lineage, which was absent in Chile, Colombia and Ecuador, altho…	spa	Biomedica : revista del Instituto Nacional de Salud	Biomedica	8205605	2017	Jun		37	2	233-237	Internet	Patricia Jiménez	Jiménez, P; Calvopiña, K; Herrera, D; Rojas, C; Pérez-Lago, L; Grijalva, M; Guna, R; García-de Viedma, D	Grupo de Investigación en Sanidad Animal y Humana, Departamento de Ciencias de la Vida y la Agricultura, Universidad de las Fuerzas Armadas ESPE, Sangolquí, Ecuador Servicio de Microbiología, Hospital General Universitario de Valencia, Valencia, España. apjimenez@espe.edu.ec.	journal
	1	method	Peru	0			Method	0	0	0	KEW				PubMed		28554706	10.1016/j.ram.2017.02.004	Multiplex PCR assay for genotyping of Mycobacterium tuberculosis in Lima, Peru		eng	Revista Argentina de microbiologia	Rev Argent Microbiol	8002834	2017	May					Print	Carlos A Tello	Tello, CA; Borja, N; Gavilan, RG; Garcia-de-la-Guarda, R	Hospital Guillermo Almenara Irigoyen, Lima, Peru. Electronic address: carolusmagnum@gmail.com.	journal
	1	only genotyped clusters	USA	0			Clusters only	0	0	0	KEW				PubMed		28569145	10.1186/s12879-017-2480-z	Spatial-temporal distribution of genotyped tuberculosis cases in a county with active transmission	Harris County, Texas is the third most populous county in the United States and consistently has tuberculosis rates above the national average. Understanding jurisdictional epidemiologic characteristics for the most common Mycobacterium tuberculosis genotyped clusters is needed for tuberculosis prevention programs. Our objective is to describe the demographic, laboratory, clinical, temporal and g…	eng	BMC infectious diseases	BMC Infect Dis	100968551	2017	May		17	1	378	Internet	Saroochi Agarwal	Agarwal, S; Nguyen, DT; Teeter, LD; Graviss, EA	, Houston Methodist Research Institute, Houston, Texas, USA.	journal
	1	strain data not reported	USA	0			Strain data insufficient or unavailable	0	0	0	KEW				PubMed		28571914	10.1016/j.annepidem.2017.05.009	Individual- and neighborhood-level contextual factors are associated with Mycobacterium tuberculosis transmission: genotypic clustering of cases in Michigan, 2004-2012	Using genotyping data of Mycobacterium tuberculosis isolates from new cases reported to the tuberculosis (TB) surveillance program, we evaluated risk factors for recent TB transmission at both the individual- and neighborhood- levels among U.S.-born and foreign-born populations.TB cases (N = 1236) reported in Michigan during 2004 to 2012 were analyzed using multivariable Poisson regression models…	eng	Annals of epidemiology	Ann Epidemiol	9100013	2017	May					Internet	Grace A Noppert	Noppert, GA; Yang, Z; Clarke, P; Ye, W; Davidson, P; Wilson, ML	Department of Epidemiology, University of Michigan School of Public Health, Ann Arbor. Electronic address: grace.noppert@duke.edu.	journal
	1	strain data not reported	USA	0			Strain data insufficient or unavailable	0	0	0	KEW				PubMed		28578689	10.1186/s12889-017-4461-y	Race and nativity are major determinants of tuberculosis in the US: evidence of health disparities in tuberculosis incidence in Michigan, 2004-2012	The incidence of TB in Michigan was 1.5 per 100,000 people in 2012, roughly half the U.S. incidence. Despite successes in TB control, disparities in TB still exist in Michigan, particularly by race, age, and nativity. A major challenge in understanding disparities in TB burden is distinguishing between TB cases resulting from recent transmission and those resulting from reactivation of latent TB …	eng	BMC public health	BMC Public Health	100968562	2017	Jun		17	1	538	Internet	Grace A Noppert	Noppert, GA; Wilson, ML; Clarke, P; Ye, W; Davidson, P; Yang, Z	Department of Epidemiology, University of Michigan School of Public Health, Ann Arbor, MI, USA.	journal
	1	duplicate study	China	0			Duplicate	0	0	0	KEW				PubMed		28596961	10.1155/2017/2505172	Yunnan is a province located in southwestern China. The aim of this study was to investigate the genetic diversity of Mycobacterium tuberculosis (MTB) strains circulating in Yunnan Province. We used spoligotyping and a 12-locus high-resolution VNTR set to identify a total of 271 MTB isolates collected from six prefectures' Yunnan. All the 271 patients were classified as 11 different ethnic groups…	First Insight into the Molecular Epidemiology of Mycobacterium tuberculosis Isolates from the Minority Enclaves of Southwestern China.	eng	BioMed research international	Biomed Res Int	101600173	2017			2017		2505172	Internet	Chen	Lianyong	Pang
	1	duplicate study	England	0			Duplicate	0	0	0	KEW				PubMed		28606177	10.1186/s12916-017-0864-y	We estimate the proportion of tuberculosis (TB) in England due to recent household transmission, identify factors associated with being a household transmitter, and investigate the impact that identification of a case has on time to treatment of subsequent cases.	Recent household transmission of tuberculosis in England, 2010-2012: retrospective national cohort study combining epidemiological and molecular strain typing data.	eng	BMC medicine	BMC Med	101190723	2017	Jun		15	1	105	Internet	Lalor	Maeve K	Anderson
careful of duplicate study	1	duplicate study	India	0			Duplicate	0	0	0	KEW				PubMed		28610789	10.1016/j.tube.2017.04.003	This study was carried out to characterize Mycobacterium tuberculosis population in Ghatampur, Kanpur, North India, by spoligotyping and Mycobacterial Interspersed Repetitive Units-Variable Number of Tandem Repeats (MIRU-VNTRs) typing. A total of 335 isolates were genotyped by spoligotyping and Central Asian (CAS) sub-lineage was the most prevalent, comprising 59.1% of all isolates. Other lineage…	Comparative study of genotypes of Mycobacterium tuberculosis from a Northern Indian setting with strains reported from other parts of India and neighboring countries.	eng	Tuberculosis (Edinburgh, Scotland)	Tuberculosis (Edinb)	100971555	2017	Jul		105		60-72	Internet	Sharma	Pragya	Katoch
	1	duplicate study	Thailand	0			Duplicate	0	0	0	KEW				PubMed		28612994	10.1111/tan.13070	Tuberculosis (TB) occurs as a result of complex interactions between the host immune system and pathogen virulence factors. Human leukocyte antigen (HLA) class II molecules play an important role in the host immune system. However, no study has assessed the association between HLA class II genes and susceptibility to TB caused by specific strains. This study investigated the possible association …	Strain-based HLA association analysis identified HLA-DRB1*09:01 associated with modern strain tuberculosis.	eng	HLA	HLA	101675570	2017	Sep		90	3	149-156	Internet	Toyo-Oka	L	Mahasirimongkol
careful checking whether clinical isolates are new and populatoin-b ased	1	method		0			Method	0	0	0	KEW				PubMed		28659320	10.1128/JCM.00549-17	The prevalence of tuberculosis continues to be high, and nontuberculous mycobacterial (NTM) infection has also emerged worldwide. Moreover, differential and accurate identification of mycobacteria to the species or subspecies level is an unmet clinical need. Here, we developed a one-step multiplex PCR assay using whole-genome analysis and bioinformatics to identify novel molecular targets. The ai…	Development of a One-Step Multiplex PCR Assay for Differential Detection of Major Mycobacterium Species.	eng	Journal of clinical microbiology	J Clin Microbiol	7505564	2017	Sep		55	9	2736-2751	Internet	Chae	Hansong	Han
	1	resist	Greece	0			Drug resistant strains only	0	0	0	KEW				PubMed		28698038	10.1016/j.cmi.2017.07.002		Multidrug-resistant/extensively drug-resistant tuberculosis in Greece: predominance of Mycobacterium tuberculosis genotypes endemic in the Former Soviet Union countries.	eng	Clinical microbiology and infection : the official publication of the European Society of Clinical Microbiology and Infectious Diseases	Clin Microbiol Infect	9516420	2017	Jul					Internet	Ioannidis	P	van Soolingen
	1	duplicate study, previously treated only	Taiwan	0			Duplicate	0	0	0	KEW				PubMed		28710410	10.1038/s41598-017-05674-6	In total, 303 randomly selected clinical Mycobacterium tuberculosis (MTB) isolates from 303 patients (collected January to December 2012) in central Taiwan were examined. The major lineages found were Beijing (N = 114, 37.62%), Haarlem (N = 76, 25.08%) and East African-Indian (EAI) (N = 42, 13.86%). Notably, younger persons (≤30 years old) were 6.58 times more likely to be infected with a Beijing…	Combining molecular typing and spatial pattern analysis to identify areas of high tuberculosis transmission in a moderate-incidence county in Taiwan.	eng	Scientific reports	Sci Rep	101563288	2017	Jul		7	1	5394	Internet	Chen	Yih-Yuan	Chang
	1	duplicate study, previously treated only	Benin	0			Duplicate	0	0	0	KEW				PubMed		28713434	10.1155/2017/3276240	Molecular studies on tuberculosis (TB) are rare in low-resource countries like Benin, where data on molecular study on previously treated TB cases is unavailable.	First Insight into a Nationwide Genotypic Diversity of Mycobacterium tuberculosis among Previously Treated Pulmonary Tuberculosis Cases in Benin, West Africa.	eng	The Canadian journal of infectious diseases & medical microbiology = Journal canadien des maladies infectieuses et de la microbiologie medicale	Can J Infect Dis Med Microbiol	101226876	2017			2017		3276240	Print	Affolabi	Dissou	Sanoussi
	1	method	Spain	0			Method	0	0	0	KEW				PubMed		28722603	10.4269/ajtmh.16-0782	We evaluated Tuberculosis-Spoligo-Rifampicin-Isoniazid Typing (TB-SPRINT), a microbead-based method for spoligotyping and detection of rifampicin and isoniazid resistance in Mycobacterium tuberculosis. For that, 67 M. tuberculosis complex strains were retrospectively selected. Membrane-based spoligotyping, restriction fragment length polymorphism, DNA sequencing/pyrosequencing of rpoB, katG, and …	Molecular Characterization of Mycobacterium tuberculosis Strains with TB-SPRINT.	eng	The American journal of tropical medicine and hygiene	Am J Trop Med Hyg	0370507	2017	Sep		97	3	806-809	Internet	Molina-Moya	Barbara	Gomgnimbou
	1	unclear sampling method	Japan	0			Unclear sampling method	0	0	0	KEW				PubMed		28740030	10.7883/yoken.JJID.2017.136		Phylogenetic Characteristics of Mycobacterium tuberculosis Clinical Isolates in Akita Prefecture, Japan, on the Basis of the Preliminary Detection of Beijing Family Strains.	eng	Japanese journal of infectious diseases	Jpn J Infect Dis	100893704	2017			70	4	472-473	Internet	Konno	Takayuki	Takahashi
	1	HIV-infected only	Vietnam	0			HIV-TB coinfection only	0	0	0	KEW				PubMed		28743648	10.1016/j.jgar.2017.07.003	Mycobacterium tuberculosis strain diversity and drug resistance among people living with human immunodeficiency virus (HIV) in Vietnam have not been described previously.	Drug resistance and Mycobacterium tuberculosis strain diversity in TB/HIV co-infected patients in Ho Chi Minh city, Vietnam.	eng	Journal of global antimicrobial resistance	J Glob Antimicrob Resist	101622459	2017	Sep		10		154-160	Internet	Mai	Trinh Quynh	Van Anh
	1	duplicate data	China	0			Duplicate	0	0	0	KEW				PubMed		28745309	10.1038/emi.2017.58	Although several optimal mycobacterial interspersed repetitive units-variable number tandem repeat (MIRU-VNTR) loci have been suggested for genotyping homogenous Mycobacterium tuberculosis, including the Beijing genotype, a more efficient and convenient selection strategy for identifying optimal VNTR loci is needed. Here 281 M. tuberculosis isolates were analyzed. Beijing genotype and non-Beijing…	A quantitative and efficient approach to select MIRU-VNTR loci based on accumulation of the percentage differences of strains for discriminating divergent Mycobacterium tuberculosis sublineages.	eng	Emerging microbes & infections	Emerg Microbes Infect	101594885	2017	Jul		6	7	e68	Internet	Pan	Xin-Ling	Zhang
	1	unclear sampling method	Mexico	0			Unclear sampling method	0	0	0	KEW				PubMed		28760681	10.1016/j.jgar.2017.07.004	The objectives of this study were to analyse the frequency of gene mutations associated with antitubercular drug resistance in clinical samples from the population of Jalisco State (Mexico) and to evaluate the genetic variability of Mycobacterium tuberculosis and multidrug-resistant (MDR) M. tuberculosis strains to describe the frequency of various families.	Genetic diversity of Mycobacterium tuberculosis and transmission associated with first-line drug resistance: a first analysis in Jalisco, Mexico.	eng	Journal of global antimicrobial resistance	J Glob Antimicrob Resist	101622459	2017	Jul		11		90-97	Internet	Lopez-Avalos	Gladys	Gonzalez-Palomar
	1	insufficient strain data	China	0			Strain data insufficient or unavailable	0	0	0	KEW				PubMed		28794425	10.1038/s41598-017-08061-3	It is generally believed that drug resistance among treated tuberculosis (TB) patients is as a result of acquired drug resistance due to inappropriate treatment. Previous studies have shown that primary drug resistance caused by transmission also plays a role among treated cases. Differentiating the two types of drug resistance will help in developing appropriate strategies for control of drug re…	Transmission is a Noticeable Cause of Resistance Among Treated Tuberculosis Patients in Shanghai, China.	eng	Scientific reports	Sci Rep	101563288	2017	Aug		7	1	7691	Internet	Nsofor	Chijioke A	Jiang
	1	duplicate data	West Asia	0			Duplicate	0	0	0	KEW				PubMed		28893611	10.1016/j.ympev.2017.09.002	To date, a major attention was justly given to the global lineages of Mycobacterium tuberculosis. Here, we demonstrated an importance of the minor ones, on an example of intriguing and underestimated NEW-1 family that belongs to Euro-American lineage (lineage 4). Analysis of the global WGS/NGS datasets (5715 strains) identified 2235 strains of Lineage 4 and 66 strains of sublineage L4.5. This lat…	Emerging peak on the phylogeographic landscape of Mycobacterium tuberculosis in West Asia: Definitely smoke, likely fire.	eng	Molecular phylogenetics and evolution	Mol Phylogenet Evol	9304400	2017	Nov		116		202-212	Internet	Mokrousov	Igor	Shitikov
	1	article in chinese	China	0			Not English	0	0	0	KEW				PubMed		28910939		Objective: To understand the genotype distribution of Mycobacterium tuberculosis and the drug susceptibility of M. tuberculosis with different genotypes in Changping district of Beijing and evaluate the application of genotyping of M. tuberculosis in local tuberculosis (TB) prevention and control. Methods: A total of 1 099 M. tuberculosis strains isolated in Changping from 2011 to 2015 were used.…	[Genotyping and drug susceptibility of Mycobacterium tuberculosis isolated in Changping district in Beijing, 2011-2015].	chi	Zhonghua liu xing bing xue za zhi = Zhonghua liuxingbingxue zazhi	Zhonghua Liu Xing Bing Xue Za Zhi	8208604	2017	Sep		38	9	1236-1240	Print	Zhang	Z G	Wu
careful of duplicate study	1		India	0			Duplicate	0	0	0	KEW				PubMed		28941853	10.1016/j.ijtb.2017.05.004	As there are no data available regarding the strains of Mycobacterium tuberculosis circulating in Kashmir Valley, India, the current study aimed at describing the genetic diversity of M. tuberculosis strains in this region, by spoligotyping and 12-locus-based MIRU-VNTR typing (Mycobacterial Interspersed Repetitive Unit-Variable Number Tandem Repeat).	Predominance of Central Asian and European families among Mycobacterium tuberculosis isolates in Kashmir Valley, India.	eng	The Indian journal of tuberculosis	Indian J Tuberc	0373027	2017	Oct		64	4	302-308	Print	Bashir	Gulnaz	Wani
	1	non-population based	Vietnam	0			Biased sampling	0	0	0	KEW				PubMed		29018250	10.1038/emi.2017.73	Pyrazinamide (PZA) is a key antibiotic in current anti-tuberculosis regimens. Although the WHO has stressed the urgent need to obtain data on PZA resistance, in high tuberculosis burden countries, little is known about the level of PZA resistance, the genetic basis of such resistance or its link with Mycobacterium tuberculosis families. In this context, this study assessed PZA resistance through …	Molecular analysis of pyrazinamide resistance in Mycobacterium tuberculosis in Vietnam highlights the high rate of pyrazinamide resistance-associated mutations in clinical isolates.	eng	Emerging microbes & infections	Emerg Microbes Infect	101594885	2017	Oct		6	10	e86	Internet	Huy	Nguyen Quang	Lucie
	1	resist	Ireland	0			Drug resistant strains only	0	0	0	KEW				PubMed		29031637	10.1016/j.jinf.2017.10.002	The primary objective of this work was to examine the acquisition and spread of multi-drug resistant (MDR) tuberculosis (TB) in Ireland.	Molecular epidemiology of multi- and extensively-drug-resistant Mycobacterium tuberculosis in Ireland, 2001-2014.	eng	The Journal of infection	J Infect	7908424	2017	Oct					Internet	Roycroft	E	O'Toole
	1	insufficient strain data	Denmark, Finland, Sweden	0			Strain data insufficient or unavailable	0	0	0	KEW				PubMed		29031789	10.1016/j.cmi.2017.10.005	To compare the epidemiology of tuberculosis (TB) in Denmark, Sweden and Finland, by focusing on the native population in order to identify epidemiological differences and thus indirectly possible differences in TB control.	Trends and differences in tuberculosis incidences and clustering among natives in Denmark, Sweden and Finland - a comparison of native incidences and molecular epidemiology among three low incidence countries.	eng	Clinical microbiology and infection : the official publication of the European Society of Clinical Microbiology and Infectious Diseases	Clin Microbiol Infect	9516420	2017	Oct					Internet	Pedersen	Mathias Klok	Lillebaek
	1	beijing vs non-beijing	Japan	0			Did not test or report all genotypes	0	0	0	KEW				PubMed		29046413	10.1128/JCM.01016-17	Strain genotyping based on the variable-number tandem repeat (VNTR) is widely applied for identifying the transmission of Mycobacterium tuberculosis A consensus set of four hypervariable loci (1982, 3232, 3820, and 4120) has been proposed to improve the discrimination of Beijing lineage strains. Herein, we evaluated the utility of these four hypervariable loci for tracing local tuberculosis trans…	Prediction of Local Transmission of Mycobacterium tuberculosis Isolates of a Predominantly Beijing Lineage Using a Variable-Number Tandem Repeat (VNTR) Typing Method Incorporating a Consensus Set of Hypervariable Loci.	eng	Journal of clinical microbiology	J Clin Microbiol	7505564	2017	Oct					Internet	Murase	Yoshiro	Izumi
	1	insufficient strain data	Peru	0			Strain data insufficient or unavailable	0	0	0	KEW				PubMed		29048297	10.3201/eid2311.170077	Because within-host Mycobacterium tuberculosis diversity complicates diagnosis and treatment of tuberculosis (TB), we measured diversity prevalence and associated factors among 3,098 pulmonary TB patients in Lima, Peru. The 161 patients with polyclonal infection were more likely than the 115 with clonal or the 2,822 with simple infections to have multidrug-resistant TB.	Polyclonal Pulmonary Tuberculosis Infections and Risk for Multidrug Resistance, Lima, Peru.	eng	Emerging infectious diseases	Emerg Infect Dis	9508155	2017	11		23	11	1887-1890	Internet	Nathavitharana	Ruvandhi R	Shi
	1	duplicate data	India	0			Duplicate	0	0	0	KEW				PubMed		29050774	10.1016/j.tube.2017.08.002	Amplification of drug resistance in Mycobacterium tuberculosis (M.tb) and its transmission are significant barriers in controlling tuberculosis (TB) globally. Diagnostic inaccuracies and delays impede appropriate drug administration, which exacerbates primary and secondary drug resistance. Increasing affordability of whole genome sequencing (WGS) and exhaustive cataloguing of drug resistance muta…	Whole genome sequencing of clinical strains of Mycobacterium tuberculosis from Mumbai, India: A potential tool for determining drug-resistance and strain lineage.	eng	Tuberculosis (Edinburgh, Scotland)	Tuberculosis (Edinb)	100971555	2017	Dec		107		63-72	Internet	Chatterjee	Anirvan	Nilgiriwala
	1	duplicate data	Madagascar	0			Duplicate	0	0	0	KEW				PubMed		29053711	10.1371/journal.pone.0186088	Combining different molecular typing methods for Mycobacterium tuberculosis complex (MTBC) can be a powerful tool for molecular epidemiology-based investigation of TB. However, the current standard method that provides high discriminatory power for such a combination, mycobacterial interspersed repetitive units-variable numbers of tandem repeats typing (MIRU-VNTR), is laborious, time-consuming an…	Evaluation of spoligotyping, SNPs and customised MIRU-VNTR combination for genotyping Mycobacterium tuberculosis clinical isolates in Madagascar.	eng	PloS one	PLoS One	101285081	2017			12	10	e0186088	Internet	Rasoahanitralisoa	Rondroarivelo	Rakotosamimanana
	1	duplicate data	China	0			Duplicate	0	0	0	KEW				PubMed		29118425	10.1038/s41598-017-14119-z	The predominant prevalent Mycobacterium tuberculosis (M. tb) lineage was the Beijing genotype family in Beijing. There has been no systematic study on the association between drug resistance and Beijing genotype. Here we collected 268 M. tb strains, analyzed the background information and the bacteriological characteristics. The mean age of the cases was 40.12 years; male patients were almost thr…	The study on the association between Beijing genotype family and drug susceptibility phenotypes of Mycobacterium tuberculosis in Beijing.	eng	Scientific reports	Sci Rep	101563288	2017	Nov		7	1	15076	Internet	Liu	Yi	Jiang
unclear	1	strain data not reported	UK	0			Strain data insufficient or unavailable	0	0	0	KEW				PubMed		25920328	10.1136/thoraxjnl-2014-206416	Identifying areas and risk groups with localised Mycobacterium tuberculosis transmission in northern England from 2010 to 2012: spatiotemporal analysis incorporating highly discriminatory genotyping data	Information on geographical variation in localised transmission of TB can inform targeting of disease control activities. The aim of this study was to estimate the proportion of TB attributable to localised transmission for the period 2010-2012 in northern England and to identify case characteristics associated with spatiotemporal-genotypical clusters.We combined genotyping data with spatiotempor…	eng	Thorax	Thorax	417353	2016	Aug		71	8	742-8	Internet	María Saavedra-Campos	Saavedra-Campos, M; Welfare, W; Cleary, P; Sails, A; Burkitt, A; Hungerford, D; Okereke, E; Acheson, P; Petrovic, M	Field Epidemiology Training Programme, Public Health England, Liverpool, UK Field Epidemiology Services, Public Health England, Liverpool, UK European Programme for Intervention Epidemiology Training, European Centre for Diseases Prevention and Control, Stockholm, Sweden.	journal
	1	insufficient strain data,	Peru	0			Strain data insufficient or unavailable	0	0	0	KEW				PubMed		26175455	10.1093/infdis/jiv387	Identifying Hotspots of Multidrug-Resistant Tuberculosis Transmission Using Spatial and Molecular Genetic Data	We aimed to identify and determine the etiology of ""hotspots"" of concentrated multidrug-resistant tuberculosis (MDR-tuberculosis) risk in Lima, Peru.From 2009 to 2012, we conducted a prospective cohort study among households of tuberculosis cases from 106 health center (HC) areas in Lima, Peru. All notified tuberculosis cases and their household contacts were followed for 1 year. Symptomatic in…	eng	The Journal of infectious diseases	J Infect Dis	413675	2016	Jan		213	2	287-94	Internet	Jonathan L Zelner	Zelner, JL; Murray, MB; Becerra, MC; Galea, J; Lecca, L; Calderon, R; Yataco, R; Contreras, C; Zhang, Z; Manjourides, J; Grenfell, BT; Cohen, T	Robert Wood Johnson Foundation Health and Society Scholars Program, Interdisciplinary Center for Innovative Theory and Empirics (INCITE) & Mailman School of Public Health, Columbia University, New York, New York.	journal
	1		China	1	0	Only tested or reported results for Beijing lineage	Did not test or report all genotypes	0	1	0	LPW				PubMed	328830	26414438	10.3109/23744235.2015.1087649	Genotypic characteristics of Mycobacterium tuberculosis circulating in Xinjiang, China	Tuberculosis (TB), a chronic infectious disease caused by Mycobacterium tuberculosis (MTB), poses a serious threat to human health. We investigated the genotypes of MTB in the high prevalence province Xinjiang, China.From March 2010 to May 2013, 381 MTB isolates from patients with pulmonary TB were analyzed by molecular typing of 24 mycobacterial interspersed repetitive unit-variable number tande…	eng	Infectious diseases (London, England)	Infect Dis (Lond)	101650235	2016	Feb		48	2	108-15	Internet	Li Yuan	Yuan, L; Mi, L; Li, Y; Zhang, H; Zheng, F; Li, Z	a Department of Immunology , Tongji Medical College, Huazhong University of Science and Technology , Wuhan , Hubei.	journal
hospital	1	subpopulation: multiple episodes of treatment	China	0			Recurrent cases only	0	0	0	KEW				PubMed		26739444	10.1186/s12879-015-1331-z	Drug resistance characteristics and cluster analysis of M tuberculosis in Chinese patients with multiple episodes of anti-tuberculosis treatment	Tuberculosis (TB) patients with multiple episodes of anti-TB treatment represent an important source of TB transmission, as well as a serious threat to the control of drug resistant TB, due to the high risk of multidrug and extensively drug resistance (MDR/XDR) and elongating infectiousness of this patient group. In this study we analyzed the possible risk of development and transmission of MDR a…	eng	BMC infectious diseases	BMC Infect Dis	100968551	2016	Jan		16		4	Internet	Yi Hu	Hu, Y; Zhao, Q; Werngren, J; Hoffner, S; Diwan, VK; Xu, B	Department of Epidemiology, School of Public Health, Fudan University, 138 Yi Xue Yuan Rd, Shanghai, 200032, China. yhu@fudan.edu.cn.	journal
unclear	1	duplicate data from 2258197	Mali	0			Duplicate	0	0	0	KEW				PubMed		26751217	10.1371/journal.pntd.0004332	Whole Genome Sequencing of Mycobacterium africanum Strains from Mali Provides Insights into the Mechanisms of Geographic Restriction	Mycobacterium africanum, made up of lineages 5 and 6 within the Mycobacterium tuberculosis complex (MTC), causes up to half of all tuberculosis cases in West Africa, but is rarely found outside of this region. The reasons for this geographical restriction remain unknown. Possible reasons include a geographically restricted animal reservoir, a unique preference for hosts of West African ethnicity,…	eng	PLoS neglected tropical diseases	PLoS Negl Trop Dis	101291488	2016	Jan		10	1	e0004332	Internet	Kathryn Winglee	Winglee, K; Manson McGuire, A; Maiga, M; Abeel, T; Shea, T; Desjardins, CA; Diarra, B; Baya, B; Sanogo, M; Diallo, S; Earl, AM; Bishai, WR	Center for Tuberculosis Research, Department of Medicine, Johns Hopkins University, Baltimore, Maryland, United States of America.	journal
hospital	1	insufficient strain data	South Africa	0			Strain data insufficient or unavailable	0	0	0	KEW				PubMed		26768249	10.1093/infdis/jiw014	Within-Host Heterogeneity of Mycobacterium tuberculosis Infection Is Associated With Poor Early Treatment Response: A Prospective Cohort Study	The clinical management of tuberculosis is a major challenge in southern Africa. The prevalence of within-host genetically heterogeneous Mycobacterium tuberculosis infection and its effect on treatment response are not well understood. We enrolled 500 patients with tuberculosis in KwaZulu-Natal and followed them through 2 months of treatment. Using mycobacterial interspersed repetitive units-vari…	eng	The Journal of infectious diseases	J Infect Dis	413675	2016	Jun		213	11	1796-9	Internet	Ted Cohen	Cohen, T; Chindelevitch, L; Misra, R; Kempner, ME; Galea, J; Moodley, P; Wilson, D	Department of Epidemiology of Microbial Diseases, Yale School of Public Health, New Haven, Connecticut.	journal
hospital	1	Only clusters reported	Poland	0			Clusters only	0	0	0	LPW				PubMed		26842376		Transmission of tuberculosis among people living in the border areas of Poland, the Czech Republic, and Slovakia	In 2007, Poland, the Czech Republic, and Slovakia joined the Schengen Agreement, abolishing restrictions on people crossing the borders. Currently, these areas are places of population movements for economic, family, and touristic reasons. This favors the transmission of infectious diseases, including tuberculosis, and requires enhanced control over the spread of the source of infection in the po…	eng	Polskie Archiwum Medycyny Wewnetrznej	Pol Arch Med Wewn	401225	2016			126	2017-01-02	32-40	Internet	Monika Kozi?ska	Kozi?ska, M; Zientek, J; Augustynowicz-Kope?, E; Zwolska, Z; Kozielski, J		journal
unclear	1	insufficient strain data	China	0			Strain data insufficient or unavailable	0	0	0	KEW				PubMed		26902762	10.1128/AAC.02358-15	Compensatory Mutations of Rifampin Resistance Are Associated with Transmission of Multidrug-Resistant Mycobacterium tuberculosis Beijing Genotype Strains in China	Mycobacterium tuberculosis can acquire resistance to rifampin (RIF) through mutations in the rpoB gene. This is usually accompanied by a fitness cost, which, however, can be mitigated by secondary mutations in the rpoA or rpoC gene. This study aimed to identify rpoA and rpoC mutations in clinical M. tuberculosis isolates in northern China in order to clarify their role in the transmission of drug…	eng	Antimicrobial agents and chemotherapy	Antimicrob Agents Chemother	315061	2016	May		60	5	2807-12	Internet	Qin-Jing Li	Li, QJ; Jiao, WW; Yin, QQ; Xu, F; Li, JQ; Sun, L; Xiao, J; Li, YJ; Mokrousov, I; Huang, HR; Shen, AD	Key Laboratory of Major Diseases in Children and National Key Discipline of Pediatrics (Capital Medical University), Ministry of Education, Beijing Key Laboratory of Pediatric Respiratory Infection Diseases, Beijing Pediatric Research Institute, Beijing Children's Hospital, Capital Medical University, Beijing, China.	journal
	1	Institute specializes in MDR/XDR so samples are biased that way	Russia	0			Biased sampling	0	0	0	LPW				PubMed		26929267	10.1093/jac/dkw015	Simultaneous drug resistance detection and genotyping of Mycobacterium tuberculosis using a low-density hydrogel microarray	Nucleic acid amplification tests are widely used in TB diagnostics. Priority tasks in their development consist of increasing the specificity and sensitivity of the detection of resistance to a wide spectrum of anti-TB drugs.We developed a multiplexed assay allowing the detection of 116 drug resistance-determining mutations in the rpoB, katG, inhA, ahpC, gyrA, gyrB, rrs, eis and embB genes in the…	eng	The Journal of antimicrobial chemotherapy	J Antimicrob Chemother	7513617	2016	6		71	6	1520-31	Internet	Danila V Zimenkov	Zimenkov, DV; Kulagina, EV; Antonova, OV; Zhuravlev, VY; Gryadunov, DA	Engelhardt Institute of Molecular Biology, Russian Academy of Sciences, Moscow, Russian Federation z@biochip.ru.	journal
	1	strain data not reported	Australia	0			Strain data insufficient or unavailable	0	0	0	LPW				PubMed		26938641	10.1371/journal.pone.0150550	Identifying Likely Transmission Pathways within a 10-Year Community Outbreak of Tuberculosis by High-Depth Whole Genome Sequencing	Improved tuberculosis control and the need to contain the spread of drug-resistant strains provide a strong rationale for exploring tuberculosis transmission dynamics at the population level. Whole-genome sequencing provides optimal strain resolution, facilitating detailed mapping of potential transmission pathways.We sequenced 22 isolates from a Mycobacterium tuberculosis cluster in New South Wa…	eng	PloS one	PLoS One	101285081	2016			11	3	e0150550	Internet	Alexander C Outhred	Outhred, AC; Holmes, N; Sadsad, R; Martinez, E; Jelfs, P; Hill-Cawthorne, GA; Gilbert, GL; Marais, BJ; Sintchenko, V	NSW Mycobacterium Reference Laboratory, Centre for Infectious Diseases and Microbiology Laboratory Services, Institute of Clinical Pathology and Medical Research-Pathology West, Sydney, Australia.	journal
unclear, method	1	method, insufficient strain data	UK	0			Method	0	0	0	KEW				PubMed		26939051	10.1371/journal.pone.0149435	MIRU-VNTR Genotyping of Mycobacterium tuberculosis Strains Using QIAxcel Technology: A Multicentre Evaluation Study	Molecular genotyping of M.tuberculosis is an important laboratory tool in the context of emerging drug resistant TB. The standard 24-loci MIRU-VNTR typing includes PCR amplification followed by the detection and sizing of PCR fragments using capillary electrophoresis on automated sequencers or using agarose gels. The QIAxcel Advanced system might offer a cost-effective medium-throughput alternati…	eng	PloS one	PLoS One	101285081	2016			11	3	e0149435	Internet	Vladyslav Nikolayevskyy	Nikolayevskyy, V; Trovato, A; Broda, A; Borroni, E; Cirillo, D; Drobniewski, F	Infectious Diseases, Imperial College London, London, United Kingdom.	journal
	1	Binary spoligos available in shaded boxes, not extractable format	China	0			Strain data insufficient or unavailable	0	0	0	LPW				PubMed		26939531	10.1186/s12879-016-1441-2	Characterization of Mycobacterium tuberculosis isolates from Hebei, China: genotypes and drug susceptibility phenotypes	Tuberculosis remains a major public health problem in China. The Hebei province is located in the Beijing-Tianjin-Hebei integration region; however little information about the genetic diversity of Mycobacterium tuberculosis was available in this area. This study describes the first attempt to map the molecular epidemiology of MTB strains isolated from Hebei.Spoligotyping and 15-locus MIRU-VNTR w…	eng	BMC infectious diseases	BMC Infect Dis	100968551	2016	Mar		16		107	Internet	Yanan Li	Li, Y; Cao, X; Li, S; Wang, H; Wei, J; Liu, P; Wang, J; Zhang, Z; Gao, H; Li, M; Wan, K; Dai, E	Department of Laboratory Medicine, the Fifth Hospital of Shijiazhuang, Hebei Medical University, 42 Tanan Road, Shijiazhuang, Hebei, 050021, China. niwawa941@163.com.	journal
	1	Does not report strain types	Iran	0			Strain data insufficient or unavailable	0	0	0	LPW				PubMed		26944666	10.1016/j.micpath.2016.02.015	High prevalence of Mycobacterium tuberculosis mixed infection in the capital of moderate tuberculosis incidence country	Recent studies using molecular epidemiological techniques have demonstrated mixed infection with multiple strains of Mycobacterium tuberculosis especially in countries with high tuberculosis (TB) burden. We aimed to determine the prevalence of mixed infection among patients with TB in the capital of Iran as a country with moderate incidence rate.Samples were collected randomly from January 2011 t…	eng	Microbial pathogenesis	Microb Pathog	8606191	2016	Apr		93		213-8	Internet	Elahe Sadat Hajimiri	Hajimiri, ES; Masoomi, M; Ebrahimzadeh, N; Fateh, A; Hadizadeh Tasbiti, A; Rahimi Jamnani, F; Bahrmand, AR; Mirsaeidi, M; Vaziri, F; Siadat, SD	Department of Mycobacteriology and Pulmonary Research, Pasteur Institute of Iran, Tehran, Iran; Department of Microbiology, Zanjan Branch, Islamic Azad University, Zanjan, Iran.	journal
includes new and previously published samples	1	Review	West Africa	0			Review	0	0	0	KEW				PubMed		26964059	10.1371/journal.pntd.0004408	A Mycobacterial Perspective on Tuberculosis in West Africa: Significant Geographical Variation of M africanum and Other M tuberculosis Complex Lineages	Phylogenetically distinct Mycobacterium tuberculosis lineages differ in their phenotypes and pathogenicity. Consequently, understanding mycobacterial population structures phylogeographically is essential for design, interpretation and generalizability of clinical trials. Comprehensive efforts are lacking to date to establish the West African mycobacterial population structure on a sub-continenta…	eng	PLoS neglected tropical diseases	PLoS Negl Trop Dis	101291488	2016	Mar		10	3	e0004408	Internet	Florian Gehre	Gehre, F; Kumar, S; Kendall, L; Ejo, M; Secka, O; Ofori-Anyinam, B; Abatih, E; Antonio, M; Berkvens, D; de Jong, BC	Mycobacterial Unit, Biomedical Sciences, Institute of Tropical Medicine, Antwerp, Belgium.	journal
hospital, tsunami	1	Full strain data not reported	Japan	0			Strain data insufficient or unavailable	0	0	0	LPW				PubMed		26970161	10.5588/ijtld.15.0607	Clinical and molecular epidemiological features of tuberculosis after the 2011 Japan earthquake and tsunami	To investigate clinical characteristics and prognosis in tuberculosis (TB) patients and the transmission dynamics of TB after the 2011 Japan earthquake and tsunami.This was a retrospective observational cohort study. Data were analyzed among 93 pulmonary TB patients (tsunami-affected areas 25, non-tsunami areas 68) hospitalized during March 2011-March 2012 with 1-year follow-up since treatment co…	eng	The international journal of tuberculosis and lung disease : the official journal of the International Union against Tuberculosis and Lung Disease	Int J Tuberc Lung Dis	9706389	2016	Apr		20	4	505-14	Internet	H Kanamori	Kanamori, H; Hatakeyama, T; Uchiyama, B; Weber, DJ; Takeuchi, M; Endo, S; Hirakata, Y; Kaku, M	Miyagi Cardiovascular and Respiratory Center, Kurihara, Miyagi, Japan; Department of Infection Control and Laboratory Diagnostics, Internal Medicine, Tohoku University Graduate School of Medicine, Sendai, Miyagi, Japan; Division of Infectious Diseases, University of North Carolina School of Medicine, Chapel Hill, North Carolina, USA.	journal
	1	unclear sampling method	China	0			Unclear sampling method	0	0	0	LPW				PubMed		26981535	10.1155/2016/6790985	Molecular Typing Characteristic and Drug Susceptibility Analysis of Mycobacterium tuberculosis Isolates from Zigong, China	China is one of the 22 countries with high TB burden worldwide, and Sichuan contained the second-largest number of TB cases among all of the Chinese provinces. But the characteristics of Mycobacterium tuberculosis circulated in Zigong, Sichuan, were still unknown. To investigate the character and drug resistance profile, 265 clinical isolates were cultured from tuberculosis patient's sputum sampl…	eng	BioMed research international	Biomed Res Int	101600173	2016			2016		6790985	Internet	Hai-Can Liu	Liu, HC; Deng, JP; Dong, HY; Xiao, TQ; Zhao, XQ; Zhang, ZD; Jiang, Y; Liu, ZG; Li, Q; Wan, KL	State Key Laboratory for Infectious Diseases Prevention and Control, Collaborative Innovation Center for Diagnosis and Treatment of Infectious Diseases, National Institute for Communicable Disease Control and Prevention, Chinese Center for Disease Control and Prevention, Beijing 102206, China.	journal
unclear	1	English article unavailable	China	0			Not English	0	0	0	LPW				PubMed		27005544		[Polymorphisms of toxin-antitoxin-chaperone system of Mycobacterium tuberculosis complex in China]	To investigate the single nucleotide polymorphism (SNP) of toxin-antitoxin-chaperone (TAC) system of Mycobacterium (M.) tuberculosis with different genotypes and its biological significance.A total of 183 clinical M. tuberculosis isolates were collected for spoligotyping. The sequences of higA,higB and Rv1957 were obtained by using PCR and DNA sequencing. The sequences were compared for possible …	chi	Zhonghua liu xing bing xue za zhi = Zhonghua liuxingbingxue zazhi	Zhonghua Liu Xing Bing Xue Za Zhi	8208604	2016	Mar		37	3	394-7	Print	Tongyang Xiao	Xiao, T; Zhao, L; Liu, H; Li, M; Zhao, X; Wan, K	State Key Laboratory of Communicable Disease Prevention and Control, Collaborative Innovation Center for Diagnosis and Treatment of Communiicable Diseases, National Institute for Communicable Disease Prevention and Control, Chinese Center for Disease Control and Prevention, Beijing 102206, China.	journal
	1	Full text unavailable	Global	0			Full text unavailable	0	0	0	LPW				PubMed		27021095	10.1007/s10517-016-3243-3	Detection and Characteristics of Rifampicin-Resistant Isolates of Mycobacterium tuberculosis	Genotyping and analysis the drug resistance of 59 isolates of M. tuberculosis obtained from patients living in Altai Territory were performed using a BACTEC MGIT 960 fluorometric system by means of VNTR typing (variable number tandem repeat), PCR-RFLP analysis, and sequence analysis. The occurrence frequency was highest for isolates of the Beijing family (n=30, 50.8%). Analysis of mutation spectr…	eng	Bulletin of experimental biology and medicine	Bull Exp Biol Med	372557	2016	Mar		160	5	659-63	Internet	A G Cherednichenko	Cherednichenko, AG; Dymova, MA; Solodilova, OA; Petrenko, TI; Prozorov, AI; Filipenko, ML	Research Institute of Tuberculosis, Ministry of Health of the Russian Federation, Novosibirsk, Russia.	journal
unclear	1	insufficient strain data	China	0			Strain data insufficient or unavailable	0	0	0	KEW				PubMed		27047485	10.3389/fmicb.2016.00378	Mycobacterial Interspersed Repetitive Unit Can Predict Drug Resistance of Mycobacterium tuberculosis in China	Recently, Mycobacterial Interspersed Repetitive Unit (MIRU) was supposed to be associated with drug resistance in Mycobacterium tuberculosis (M. tuberculosis), but whether the association exists actually in local strains in China was still unknown. This research was conducted to explore that association and the predictability of MIRU to drug resistance of Tuberculosis (TB).The clinical isolates w…	eng	Frontiers in microbiology	Front Microbiol	101548977	2016			7		378	Print	Xian-Feng Cheng	Cheng, XF; Jiang, C; Zhang, M; Xia, D; Chu, LL; Wen, YF; Zhu, M; Jiang, YG	School of Public Health, Wannan Medical CollegeWuhu, China; Clinical Laboratory, Institute of Dermatology, Chinese Academy of Medical Sciences - Peking Union Medical CollegeNanjing, China.	journal
	1	resist	South Africa	0			Drug resistant strains only	0	0	0	KEW				PubMed		27073397	10.1155/2016/6572165	Diverse Molecular Genotypes of Mycobacterium tuberculosis Complex Isolates Circulating in the Free State, South Africa	Tuberculosis is a serious public health concern especially in Africa and Asia. Studies describing strain diversity are lacking in the Free State region of South Africa. The aim of the study was to describe the diversity of Mycobacterium tuberculosis (M. tuberculosis) strain families in the Free State province of South Africa. A total of 86 M. tuberculosis isolates were genotyped using spoligotypi…	eng	International journal of microbiology	Int J Microbiol	101516125	2016			2016		6572165	Print	Anneke Van der Spoel van Dijk	Van der Spoel van Dijk, A; Makhoahle, PM; Rigouts, L; Baba, K	Department of Medical Microbiology, Faculty of Health Sciences, University of the Free State, Bloemfontein, South Africa; National Health Laboratory Service, Universitas Academic Laboratory, Bloemfontein 9301, South Africa.	journal
	1	Only clusters reported by lineage	Australia	0			Clusters only	0	0	0	LPW				PubMed		27084820	10.5588/ijtld.15.0437	Molecular epidemiology of tuberculosis in Victoria, Australia, reveals low level of transmission	Victoria, Australia.To measure the level of Mycobacterium tuberculosis transmission in Victoria.Retrospective analysis of mycobacterial interspersed repetitive unit-variable number of tandem repeats (MIRU-VNTR) typing profiles from all first M. tuberculosis complex (MTC) isolates obtained from patients residing in Victoria from 2003 to 2010 was performed. State TB reference laboratory records wer…	eng	The international journal of tuberculosis and lung disease : the official journal of the International Union against Tuberculosis and Lung Disease	Int J Tuberc Lung Dis	9706389	2016	May		20	5	652-8	Internet	M Globan	Globan, M; Lavender, C; Leslie, D; Brown, L; Denholm, J; Raios, K; Sievers, A; Kelly, H; Fyfe, J	Mycobacterium Reference Laboratory, Victorian Infectious Diseases Reference Laboratory (VIDRL), Canberra, Australia.	journal
	1	Only clusters reported by lineage	USA	0			Clusters only	0	0	0	LPW				PubMed		27093156	10.1371/journal.pone.0153575	Spatiotemporal Clustering of Mycobacterium tuberculosis Complex Genotypes in Florida: Genetic Diversity Segregated by Country of Birth	Tuberculosis (TB) is caused by members of the Mycobacterium tuberculosis complex (MTBC). Although the MTBC is highly clonal, between-strain genetic diversity has been observed. In low TB incidence settings, immigration may facilitate the importation of MTBC strains with a potential to complicate TB control efforts.We investigated the genetic diversity and spatiotemporal clustering of 2,510 MTBC s…	eng	PloS one	PLoS One	101285081	2016			11	4	e0153575	Internet	Marie Nancy Séraphin	Séraphin, MN; Lauzardo, M; Doggett, RT; Zabala, J; Morris, JG; Blackburn, JK	Department of Medicine, Division of Infectious Diseases and Global Medicine, College of Medicine, University of Florida, Gainesville, FL, United States of America.	journal
	1	unclear or convenience sampling method	Iran	0			Unclear sampling method	0	0	0	KEW				PubMed		27192590	10.1590/0037-8682-0405-2015	Molecular characterization of Mycobacterium tuberculosis isolates from Tehran, Iran by restriction fragment length polymorphism analysis and spoligotyping	INTRODUCTION Characterization of Mycobacterium tuberculosis (MTB) isolates by DNA fingerprinting has contributed to tuberculosis (TB) control. The aim of this study was to determine the genetic diversity of MTB isolates from Tehran province in Iran. METHODS MTB isolates from 60 Iranian and 10 Afghan TB patients were fingerprinted by standard IS6110-restriction fragment length polymorphism (RFLP) …	eng	Revista da Sociedade Brasileira de Medicina Tropical	Rev Soc Bras Med Trop	7507456	2016	Apr		49	2	204-10	Internet	Seifu Gizaw Feyisa	Feyisa, SG; Haeili, M; Zahednamazi, F; Mosavari, N; Taheri, MM; Hamzehloo, G; Zamani, S; Feizabadi, MM	International Campus (TUMS-IC), Tehran University of Medical Sciences, Tehran, Iran.	journal
unclear, wgs	1	strain data not reported	Switzerland	0			Strain data insufficient or unavailable	0	0	0	KEW				PubMed		27194683	10.1128/JCM.00126-16	Standard Genotyping Overestimates Transmission of Mycobacterium tuberculosis among Immigrants in a Low-Incidence Country	Immigrants from regions with a high incidence of tuberculosis (TB) are a risk group for TB in low-incidence countries such as Switzerland. In a previous analysis of a nationwide collection of 520 Mycobacterium tuberculosis isolates from 2000 to 2008, we identified 35 clusters comprising 90 patients based on standard genotyping (24-locus mycobacterial interspersed repetitive-unit-variable-number t…	eng	Journal of clinical microbiology	J Clin Microbiol	7505564	2016	Jul		54	7	1862-70	Internet	David Stucki	Stucki, D; Ballif, M; Egger, M; Furrer, H; Altpeter, E; Battegay, M; Droz, S; Bruderer, T; Coscolla, M; Borrell, S; Zürcher, K; Janssens, JP; Calmy, A; Mazza Stalder, J; Jaton, K; Rieder, HL; Pfyffer, GE; Siegrist, HH; Hoffmann, M; Fehr, J; Dolina, M; Frei, R; Schrenzel, J; Böttger, EC; Gagneux, S; Fenner, L	Swiss Tropical and Public Health Institute, Basel, Switzerland University of Basel, Basel, Switzerland Institute of Social and Preventive Medicine, University of Bern, Bern, Switzerland.	journal
	1	The strain data appears to be duplicated from 2741728	UK	0			Duplicate	0	0	0	KEW				PubMed		27287260	10.1186/s12879-016-1612-1	Variation in C - reactive protein response according to host and mycobacterial characteristics in active tuberculosis	The C - reactive protein (CRP) response is often measured in patients with active tuberculosis (TB) yet little is known about its relationship to clinical features in TB, or whether responses differ between ethnic groups or with different Mycobacterium tuberculosis (M.tb) strain types. We report the relationship between baseline serum CRP prior to treatment and disease characteristics in a metrop…	eng	BMC infectious diseases	BMC Infect Dis	100968551	2016	Jun		16		265	Internet	James Brown	Brown, J; Clark, K; Smith, C; Hopwood, J; Lynard, O; Toolan, M; Creer, D; Barker, J; Breen, R; Brown, T; Cropley, I; Lipman, M	Department of Respiratory Medicine, Royal Free London NHS Foundation Trust, London, UK. james.brown13@nhs.net.	journal
hospital	1	Peritoneal TB only	France	0			Peritoneal TB only	0	0	0	LPW				PubMed		27295189	10.1007/s40121-016-0113-2	Clinical Presentation, Diagnosis, and Bacterial Epidemiology of Peritoneal Tuberculosis in Two University Hospitals in France	Diagnosis of peritoneal tuberculosis (pTB) is difficult, even in developed countries, where data are lacking. The aim of the present study was to describe the clinical presentation, diagnosis, and bacterial epidemiology of pTB in France over a 10-year period.A retrospective study was conducted on pTB in two university hospitals in France, between January 2004 and December 2014.Among the 34 patien…	eng	Infectious diseases and therapy	Infect Dis Ther	101634499	2016	Jun		5	2	193-9	Print	Zoé Cavalli	Cavalli, Z; Ader, F; Valour, F; Saison, J; Boussel, L; Dumitrescu, O; Perpoint, T; Chidiac, C; May, T; Ferry, T; ,	Service de Maladies Infectieuses et Tropicales, Hôpital de la Croix-Rousse, Hospices Civils de Lyon, Lyon, France. zoe.cavalli@chu-lyon.fr.	journal
	1	convenience sample	India	0			Convenience sample	0	0	0	LPW				PubMed		27377505	10.4103/0971-5916.184287	Genetic diversity of Mycobacterium tuberculosis isolates from central India	There is a paucity of data available on genetic biodiversity of Mycobacterium tuberculosis isolates from central India. The present study was carried out on isolates of M. tuberculosis cultured from diagnostic clinical samples of patients from Bhopal, central India, using spoligotyping as a method of molecular typing.DNA was extracted from 340 isolates of M. tuberculosis from culture, confirmed a…	eng	The Indian journal of medical research	Indian J Med Res	374701	2016	Apr		143	4	481-6	Internet	Prabha Desikan	Desikan, P; Chauhan, DS; Sharma, P; Panwalkar, N; Chourey, M; Patidar, ML; Yadav, P; Chandrasekaran, V; Ohri, BS	Bhopal Memorial Hospital & Research Centre (ICMR), Bhopal, Madhya Pradesh, India.	journal
unclear	1	English article unavailable	Venezuela	0	0	also duplicate data	Not English	0	0	0	LPW				PubMed		27382799		[Evaluation of discriminatory power of molecular epidemiology techniques in Mycobacterium tuberculosis Venezuelan isolates]	The techniques of spoligotyping and mycobacterial interspersed repetitive unit and variable-number tandem repeat typing with 24 loci (MIRU-VNTR-24), have been used to study the molecular epidemiology of tuberculosis. The aim of this study was: to evaluate the discriminative power of MIRU-VNTR 24 loci alone and in association with spoligotyping in clinical isolates of M tuberculosis in Venezuela; …	spa	Investigacion clinica	Invest Clin	421531	2016	Mar		57	1	25-37	Print	Marìa Victoria Méndez	Méndez, MV; León, C; Escalona, A; Abadia, E; Da Mata, O; de Waard, J; Takiff, HE		journal
	1	method, Maf vs. Mtb	The Gambia	0			Method	0	0	0	KEW				PubMed		27387550	10.1371/journal.pntd.0004801	Impact of the Mycobaterium africanum West Africa 2 Lineage on TB Diagnostics in West Africa: Decreased Sensitivity of Rapid Identification Tests in The Gambia	MPT64 rapid speciation tests are increasingly being used in diagnosis of tuberculosis (TB). Mycobacterium africanum West Africa 2 (Maf 2) remains an important cause of TB in West Africa and causes one third of disease in The Gambia. Since the introduction of MPT64 antigen tests, a higher than expected rate of suspected non-tuberculous mycobacteria (NTM) was seen among AFB smear positive TB suspec…	eng	PLoS neglected tropical diseases	PLoS Negl Trop Dis	101291488	2016	Jul		10	7	e0004801	Internet	Boatema Ofori-Anyinam	Ofori-Anyinam, B; Kanuteh, F; Agbla, SC; Adetifa, I; Okoi, C; Dolganov, G; Schoolnik, G; Secka, O; Antonio, M; de Jong, BC; Gehre, F	Mycobacteriology Unit, Institute of Tropical Medicine (ITM), Antwerp, Belgium.	journal
	1	All strains were genotyped but only clusters reported; sample size is number of clusters	UK	0			Clusters only	0	0	0	KEW				PubMed		27417280	10.1136/thoraxjnl-2014-206608	Recent TB transmission, clustering and predictors of large clusters in London, 2010-2012: results from first 3?years of universal MIRU-VNTR strain typing	The incidence of TB has doubled in the last 20?years in London. A better understanding of risk groups for recent transmission is required to effectively target interventions. We investigated the molecular epidemiological characteristics of TB cases to estimate the proportion of cases due to recent transmission, and identify predictors for belonging to a cluster.The study population included all c…	eng	Thorax	Thorax	417353	2016	Aug		71	8	749-56	Internet	Esther L Hamblion	Hamblion, EL; Le Menach, A; Anderson, LF; Lalor, MK; Brown, T; Abubakar, I; Anderson, C; Maguire, H; Anderson, SR; ,	Field Epidemiology Services (Victoria), Public Health England, London, UK.	journal
	1	drug resistant strains only	Thailand	0			Drug resistant strains only	0	0	0	LPW				PubMed		27436385	10.1016/j.jgar.2015.11.009	Mutations in rrs, rpsL and gidB in streptomycin-resistant Mycobacterium tuberculosis isolates from Thailand	The objectives of this study were to characterise mutations in rrs, rpsL and gidB genes in Mycobacterium tuberculosis isolates from Thailand and to examine possible associations between mutations and strain genotypes. In total, 110 streptomycin (STR)-resistant M. tuberculosis isolates and 51 STR-susceptible isolates obtained from a sample collection in Thailand during 1999-2011 were sequenced for…	eng	Journal of global antimicrobial resistance	J Glob Antimicrob Resist	101622459	2016	Mar		4		2017-05-10	Internet	Nat Smittipat	Smittipat, N; Juthayothin, T; Billamas, P; Jaitrong, S; Rukseree, K; Dokladda, K; Chaiyasirinroje, B; Disratthakit, A; Chaiprasert, A; Mahasirimongkol, S; Yanai, H; Yamada, N; Tokunaga, K; Palittapongarnpim, P	Tuberculosis Research Laboratory, National Center for Genetic Engineering and Biotechnology, National Science and Technology Development Agency, Pathum Thani, Thailand. Electronic address: nat.smi@biotec.or.th.	journal
	1	duplicate study	Ghana	0			Duplicate	0	0	0	KEW				PubMed		27450017	10.1016/j.tube.2016.05.014	Detection and characterization of drug-resistant conferring genes in Mycobacterium tuberculosis complex strains: A prospective study in two distant regions of Ghana	We spoligotyped and screened 1490 clinical Mycobacterium tuberculosis complex strains from Northern and Greater Accra regions of Ghana against INH and RIF using the microplate alamar blue phenotypic assay. Specific drug resistance associated genetic elements of drug resistant strains were analyzed for mutations. A total of 111 (7.5%), 10 (0.7%) and 40 (2.6%) were mono-resistant to INH, RIF, and M…	eng	Tuberculosis (Edinburgh, Scotland)	Tuberculosis (Edinb)	100971555	2016	Jul		99		147-54	Internet	I D Otchere	Otchere, ID; Asante-Poku, A; Osei-Wusu, S; Baddoo, A; Sarpong, E; Ganiyu, AH; Aboagye, SY; Forson, A; Bonsu, F; Yahayah, AI; Koram, K; Gagneux, S; Yeboah-Manu, D	Noguchi Memorial Institute for Medical Research, University of Ghana, Accra, Ghana; Department of Biochemistry, Cell and Molecular Biology, University of Ghana, Accra, Ghana.	journal
	1	Subpopulation: treatment failure or recurrent TB	Vietnam	0			Recurrent cases only	0	0	0	KEW				PubMed		27464737	10.1186/s12866-016-0784-6	Mycobacterium tuberculosis lineages and anti-tuberculosis drug resistance in reference hospitals across Viet Nam	Mycobacterium tuberculosis, the tuberculosis (TB) pathogen, despite a low level of genetic diversity, has revealed a high variety of biological and epidemiological characteristics linked to their lineages, such as transmissibility, fitness and propensity to acquire drug resistance. This has important implications for the epidemiology of TB. We conducted this first countrywide cross-sectional stud…	eng	BMC microbiology	BMC Microbiol	100966981	2016	Jul		16	1	167	Internet	Van Anh Thi Nguyen	Nguyen, VA; Bañuls, AL; Tran, TH; Pham, KL; Nguyen, TS; Nguyen, HV; Nguyen, NL; Nguyen, NL; Dang, DA; Marks, GB; Choisy, M	Department of Bacteriology, National Institute of Hygiene Epidemiology, Hanoi, Vietnam. vananhtdt@gmail.com.	journal
unclear, rflp	1	convenience sample	South Africa	0			Convenience sample	0	0	0	KEW				PubMed		27487956	10.1128/JCM.00408-16	Evaluation of Semiautomated IS6110-Based Restriction Fragment Length Polymorphism Typing for Mycobacterium tuberculosis in a High-Burden Setting	The manual IS6110-based restriction fragment length polymorphism (RFLP) typing method is highly discriminatory; however, it is laborious and technically demanding, and data exchange remains a challenge. In an effort to improve IS6110-based RFLP to make it a faster format, DuPont Molecular Diagnostics recently introduced the IS6110-PvuII kit for semiautomated typing of Mycobacterium tuberculosis u…	eng	Journal of clinical microbiology	J Clin Microbiol	7505564	2016	Oct		54	10	2547-52	Internet	Halima M Said	Said, HM; Krishnamani, K; Omar, SV; Dreyer, AW; Sansom, B; Fallows, D; Ismail, NA	Centre for Tuberculosis, National Institute of Communicable Diseases, Johannesburg, South Africa Department of Medical Microbiology, Faculty of Health Science, University of Free State, Bloemfontein, South Africa halimas@nicd.ac.za.	journal
	1	Cluster information only	Iran	0			Clusters only	0	0	0	LPW				PubMed		27545209		Strain differentiation of Mycobacterium tuberculosis for epidemiology in northwest of Iran	Tuberculosis is a major health problem throughout the world and there are still a great number of people with the disease. Planning for controlling tuberculosis is required to identify the sources of infection and screening for the disease. The aim of this study is the differentiation of Mycobacterium tuberculosis strains for better understands the spread of the disease in North West Iran. In thi…	eng	Cellular and molecular biology (Noisy-le-Grand, France)	Cell Mol Biol (Noisy-le-grand)	9216789	2016	Jul		62	8	15-20	Internet	M Asgharzadeh	Asgharzadeh, M; Samadi Kafil, H; Pourostadi, M; Asadi Faezi, N; Rashedi, J; Mahdavipour, B	Tabriz University of Medical Sciences Biotechnology Research Center, Faculty of Paramedicine Tabriz Iran.	journal
	1	Used a convenience sample	India	0			Convenience sample	0	0	0	LPW				PubMed		27553413	10.1016/j.tube.2016.07.007	A snapshot of the predominant single nucleotide polymorphism cluster groups of Mycobacterium tuberculosis clinical isolates in Delhi, India	Several attempts have been made to associate phylogenetic differences among Mycobacterium tuberculosis strains to variations in the clinical outcome of the disease and to drug resistance. We genotyped 139 clinical isolates of M. tuberculosis obtained from patients of pulmonary tuberculosis in North Delhi region. The isolates were analyzed using nine Single nucleotide polymorphism (SNP) markers, s…	eng	Tuberculosis (Edinburgh, Scotland)	Tuberculosis (Edinb)	100971555	2016	Sep		100		72-81	Internet	Mandira Varma-Basil	Varma-Basil, M; Narang, A; Chakravorty, S; Garima, K; Gupta, S; Kumar Sharma, N; Giri, A; Zozio, T; Couvin, D; Hanif, M; Bhatnagar, A; Menon, B; Niemann, S; Rastogi, N; Alland, D; Bose, M	Dept. of Microbiology, Vallabhbhai Patel Chest Institute, University of Delhi, Delhi, 110007, India. Electronic address: mandirav@rediffmail.com.	journal
	1	Subpopulation: transmission among family members	Poland	0			Biased sampling	0	0	0	KEW				PubMed		27672069	10.5603/PiAP.2016.0034	The incidence of tuberculosis transmission among family members and outside households	The risk of Mycobacterium tuberculosis complex (MTBC) infection is correlated with the concentration of infectious particles and exposure time. In closed populations, healthy people staying in very frequent, close and prolonged contact with a smear-positive person, become infected and represent another link in the chain of transmission of the disease. Therefore, in the fight against tuberculosis,…	eng	Pneumonologia i alergologia polska	Pneumonol Alergol Pol	9302892	2016			84	5	271-7	Internet	Monika Kozi?ska	Kozi?ska, M; Augustynowicz-Kope?, E	Department of Microbiology, National Tuberculosis and Lung Diseases Research Institute, Warsaw, Poland. m.kozinska@igichp.edu.pl.	journal
	1	lin2	China	0			Did not test or report all genotypes	0	0	0	KEW				PubMed		27681182	10.1038/srep34353	Evolutionary History and Ongoing Transmission of Phylogenetic Sublineages of Mycobacterium tuberculosis Beijing Genotype in China	Mycobacterium tuberculosis Beijing genotype originated in China and has undergone a dramatic population growth and global spread in the last century. Here, a collection of M. tuberculosis Beijing family isolates from different provinces across all China was genotyped by high-resolution (24-MIRU-VNTR) and low-resolution, high-rank (modern and ancient sublineages) markers. The molecular profiles an…	eng	Scientific reports	Sci Rep	101563288	2016	Sep		6		34353	Internet	Qing-Qin Yin	Yin, QQ; Liu, HC; Jiao, WW; Li, QJ; Han, R; Tian, JL; Liu, ZG; Zhao, XQ; Li, YJ; Wan, KL; Shen, AD; Mokrousov, I	Key Laboratory of Major Diseases in Children, Ministry of Education, National Key Discipline of Pediatrics (Capital Medical University), National Clinical Research Center for Respiratory Diseases, Beijing Key Laboratory of Pediatric Respiratory Infection Diseases, Beijing Pediatric Research Institute, Beijing Children's Hospital, Capital Medical University, Beijing, China.	journal
	1	strain type not reported	United Kingdom	0			Strain data insufficient or unavailable	0	0	0	LPW				PubMed		27725038	10.5588/ijtld.16.0161	Programmatic utility of tuberculosis cluster investigation using a social network approach in Birmingham, United Kingdom	Birmingham, United Kingdom, 2010-2014.To investigate predictors for clustering of tuberculosis (TB) cases and cluster size and to evaluate the impact of cluster investigation using social network data.Retrospective observational cohort study. Prioritised cases linked using 24-locus mycobacterial interspersed repetitive units-variable number of tandem repeats (MIRU-VNTR) were interviewed using a s…	eng	The international journal of tuberculosis and lung disease : the official journal of the International Union against Tuberculosis and Lung Disease	Int J Tuberc Lung Dis	9706389	2016	Oct		20	10	1300-1305	Internet	M L Munang	Munang, ML; Browne, C; Evans, JT; Smith, EG; Hawkey, PM; Welch, SB; Kaur, H; Dedicoat, MJ	Birmingham and Solihull TB Service, Heart of England NHS Foundation Trust, Birmingham, UK.	journal
	1		Australia	1	0	duplicate data	Duplicate	0	0	0	KEW				PubMed	329901	27737005	10.1371/journal.pone.0163612	Whole Genome Sequencing Demonstrates Limited Transmission within Identified Mycobacterium tuberculosis Clusters in New South Wales, Australia	Australia has a low tuberculosis incidence rate with most cases occurring among recent immigrants. Given suboptimal cluster resolution achieved with 24-locus mycobacterium interspersed repetitive unit (MIRU-24) genotyping, the added value of whole genome sequencing was explored. MIRU-24 profiles of all Mycobacterium tuberculosis culture-confirmed tuberculosis cases diagnosed between 2009 and 2013…	eng	PloS one	PLoS One	101285081	2016			11	10	e0163612	Internet	Ulziijargal Gurjav	Gurjav, U; Outhred, AC; Jelfs, P; McCallum, N; Wang, Q; Hill-Cawthorne, GA; Marais, BJ; Sintchenko, V	Marie Bashir Institute for Infectious Diseases and Biosecurity, The University of Sydney, Sydney, Australia.	journal
	1	cluster analysis, but lots of USA strain data is available in TB GIMS if I can get access to it	USA	0			Clusters only	0	0	0	KEW				PubMed		27769182	10.1186/s12879-016-1937-9	Validation of genotype cluster investigations for Mycobacterium tuberculosis: application results for 44 clusters from four heterogeneous United States jurisdictions	Tracking the dissemination of specific Mycobacterium tuberculosis (Mtb) strains using genotyped Mtb isolates from tuberculosis patients is a routine public health practice in the United States. The present study proposes a standardized cluster investigation method to identify epidemiologic-linked patients in Mtb genotype clusters. The study also attempts to determine the proportion of epidemiolog…	eng	BMC infectious diseases	BMC Infect Dis	100968551	2016	Oct		16	1	594	Internet	Larry D Teeter	Teeter, LD; Vempaty, P; Nguyen, DT; Tapia, J; Sharnprapai, S; Ghosh, S; Kammerer, JS; Miramontes, R; Cronin, WA; Graviss, EA; ,	Houston Methodist Research Institute, Houston, TX, USA.	journal
method, unclear,	1	method	0	0			Method	0	0	0	KEW				PubMed		27806686	10.1186/s12864-016-3213-1	In silico region of difference (RD) analysis of Mycobacterium tuberculosis complex from sequence reads using RD-Analyzer	Whole-genome sequencing is increasingly used in clinical diagnosis of tuberculosis and study of Mycobacterium tuberculosis complex (MTC). MTC consists of several genetically homogenous mycobacteria species which can cause tuberculosis in humans and animals. Regions of difference (RDs) are commonly regarded as gold standard genetic markers for MTC classification.We develop RD-Analyzer, a tool that…	eng	BMC genomics	BMC Genomics	100965258	2016	Nov		17	1	847	Internet	Kiatichai Faksri	Faksri, K; Xia, E; Tan, JH; Teo, YY; Ong, RT	Department of Microbiology Faculty of Medicine, Khon Kaen University, Khon Kaen, Thailand.	journal
	1	unclear or convenience sampling method	Iran	0			Unclear sampling method	0	0	0	KEW				PubMed		27819023	10.1155/2016/7146470	Genotyping of Mycobacterium tuberculosis Isolates from Hormozgan Province of Iran Based on 15-Locus MIRU-VNTR and Spoligotyping	Background. Considering that Hormozgan province in Iran (southern part of Iran on the Persian Gulf) is among the areas with high prevalence of MDR-MTB and attracts so many sailors and tourists, genetic diversity of MTB isolates circulating in this part of Iran was evaluated. Pattern of TB transmission was also examined. Methods and Material. A total of 38 isolates of MTB were cultured from TB pat…	eng	International journal of bacteriology	Int J Bacteriol	101633390	2016			2016		7146470	Print	Samin Zamani	Zamani, S; Haeili, M; Nasiri, MJ; Imani Fooladi, AA; Javadpour, S; Feizabadi, MM	Department of Microbiology, School of Medicine, Tehran University of Medical Sciences, Tehran, Iran; Department of Microbiology, School of Medicine, Golestan University of Medical Sciences, Gorgan, Iran.	journal
unclear	1	Non random sampling	Sardinia	0			Biased sampling	0	0	0	LPW				PubMed		27847011	10.1016/j.ijmyco.2016.06.002	Tuberculosis in Sardinia: An investigation into the relationship between natives and immigrants	Tuberculosis (TB) has had a recrudescence in the last few decades in Italy as a result of many factors, among which migration from countries where TB is endemic is one of them. In Sardinia, a major island of Italy, there was no knowledge of the mechanisms of transmission of TB in the immigrant subpopulation and the impact it may have on the native subpopulation and on the community as a whole. Th…	eng	International journal of mycobacteriology	Int J Mycobacteriol	101615660	2016	Sep		5	3	280-287	Internet	Melania Ruggeri	Ruggeri, M; Molicotti, P; Cubeddu, M; Cannas, S; Bua, A; Zanetti, S	Department of Biomedical Sciences, University of Sassari, Sassari, Sardinia, Italy. Electronic address: melaruggeri@libero.it.	journal
	1	unclear or convenience sampling method	Peru	0			Unclear sampling method	0	0	0	KEW				PubMed		27928075	10.4269/ajtmh.15-0711	Detecting Mutations in the Mycobacterium tuberculosis Pyrazinamidase Gene pncA to Improve Infection Control and Decrease Drug Resistance Rates in Human Immunodeficiency Virus Coinfection	Hospital infection control measures are crucial to tuberculosis (TB) control strategies within settings caring for human immunodeficiency virus (HIV)-positive patients, as these patients are at heightened risk of developing TB. Pyrazinamide (PZA) is a potent drug that effectively sterilizes persistent Mycobacterium tuberculosis bacilli. However, PZA resistance associated with mutations in the nic…	eng	The American journal of tropical medicine and hygiene	Am J Trop Med Hyg	370507	2016	Dec		95	6	1239-1246	Internet	Matthew Z Dudley	Dudley, MZ; Sheen, P; Gilman, RH; Ticona, E; Friedland, JS; Kirwan, DE; Caviedes, L; Rodriguez, R; Cabrera, LZ; Coronel, J; Grandjean, L; Moore, DA; Evans, CA; Huaroto, L; Chávez-Pérez, V; Zimic, M	Department of International Health, Johns Hopkins Bloomberg School of Public Health, Baltimore, Maryland.	journal
	1	transmission within hospital	Turkey	0			Nocosomial transmission	0	0	0	KEW				PubMed		27966321	10.3906/sag-1412-5	Determination of genotypic varieties and genotyping of multiple drug-resistant tuberculosis by the RFLP and spoligotyping methods	The purpose of the present study was to determine the distribution and epidemiological features of mycobacteria with molecular methods.Fifty-five culture-positive samples were analyzed by polymerase chain reaction-restriction enzyme length polymorphism (PCR-RFLP) at species level, and their molecular typing was performed with spoligotyping. The IS6110 region and the locus of gene coding for Hsp65…	eng	Turkish journal of medical sciences	Turk J Med Sci	9441758	2016	Nov		46	5	1502-1511	Print	Tekin Karsl?gil	Karsl?gil, T; Bayram, A; Ek?i, F	Department of Medical Microbiology, Faculty of Medicine, Gaziantep University, Gaziantep, Turkey.	journal
unclear	1	insufficient strain data	0	0			Strain data insufficient or unavailable	0	0	0	KEW				PubMed		28025511	10.3390/ijms18010019	Immunological Roles of Elevated Plasma Levels of Matricellular Proteins in Japanese Patients with Pulmonary Tuberculosis	Elevated matricellular proteins (MCPs), including osteopontin (OPN) and galectin-9 (Gal-9), were observed in the plasma of patients with Manila-type tuberculosis (TB) previously. Here, we quantified plasma OPN, Gal-9, and soluble CD44 (sCD44) by enzyme-linked immunosorbent assay (ELISA), and another 29 cytokines by Luminex assay in 36 patients with pulmonary TB, six subjects with latent tuberculo…	eng	International journal of molecular sciences	Int J Mol Sci	101092791	2016	Dec		18	1		Internet	Beata Shiratori	Shiratori, B; Zhao, J; Okumura, M; Chagan-Yasutan, H; Yanai, H; Mizuno, K; Yoshiyama, T; Idei, T; Ashino, Y; Nakajima, C; Suzuki, Y; Hattori, T	Division of Disaster-Related Infectious Diseases, International Research Institute of Disaster Science, Tohoku University, 2-1 Seiryo-machi, Aoba-ku, Sendai, Miyagi 980-8575, Japan. beatabucekova@gmail.com.	journal
	1	RFLP, does not report full dataset	Iran	0			RFLP typing only	0	0	0	LPW				PubMed		28028521	10.4103/2277-9175.190982	Beijing strains of Mycobacterium tuberculosis in smear-positive tuberculosis patients in North-West and West of Iran	Tuberculosis (TB) is the leading cause of morbidity and mortality among chronic infectious diseases. The goal of this cross-sectional study (2012-2014) was to examine the prevalence of Mycobacterium TB (MTB) Beijing strains in regions near the Iranian border and to identify any epidemiological links.To this end, MTB isolates were harvested, from 64 HIV-negative, pulmonary smear-positive TB patien…	eng	Advanced biomedical research	Adv Biomed Res	101586897	2016			5		181	Print	Leyla Sahebi	Sahebi, L; Ansarin, K; Hoffner, S; Mohajeri, P; Mohammadi, A	Department of Tuberculosis and Lung Disease, Tuberculosis and Lung Disease Research Centre, Tabriz University of Medical Sciences, Tabriz, Iran.	journal
hospital	1	EPTB only, full text not available	India	0			Extrapulmonary TB only	0	0	0	LPW				PubMed		28043502	10.1016/j.ijmyco.2016.09.027	Genotypic analysis of multidrug-resistant tuberculosis isolates from extra pulmonary tuberculosis cases in tertiary care centers in Northern India	Multidrug-resistant tuberculosis (MDR-TB) is a major public health problem. The diagnosis of MDR-TB is of paramount importance in establishing appropriate clinical management and infection control measures. Rapid detection of MDR-TB allows the establishment of an effective treatment regimen, minimizes the risk of further resistance, and limits the spread of drug-resistant strains. The aim of this…	eng	International journal of mycobacteriology	Int J Mycobacteriol	101615660	2016	Dec		5 Suppl 1		S125-S126	Internet	Anand K Maurya	Maurya, AK; Nag, VL; Kant, S; Kushwaha, RS; Dhole, TN	Department of Microbiology, All India Institute of Medical Sciences, Jodhpur, India. Electronic address: anandmaurya1@gmail.com.	journal
	1	Full text unavailable	India	0			Full text unavailable	0	0	0	LPW				PubMed		28043536	10.1016/j.ijmyco.2016.11.015	Assessing genetic diversity of Mycobacterium tuberculosis by spoligotyping and IS6110-based restriction fragment length polymorphism in North India	Molecular epidemiology methods are very useful for differentiating between strains, assessing their diversity, and measuring the prevalence of the most circulating strain in an area. Various molecular typing methods using different molecular markers have been utilized worldwide, such as restriction fragment length polymorphism (RFLP), spoligotyping, Mycobacterial Interspersed Repetitive Unit - Va…	eng	International journal of mycobacteriology	Int J Mycobacteriol	101615660	2016	Dec		5 Suppl 1		S174-S175	Internet	Jitendra Prasad Mathuria	Mathuria, JP; Sharma, P; Prakash, P; Samaria, JK; Katoch, VM; Anupurba, S	Department of Microbiology, Institute of Medical Sciences, Banaras Hindu University, Varanasi, India; Department of Medical Lab Technology, Paramedical Vigyaan Mahavidhyalaya, Uttar Pradesh University of Medical Sciences, Saifai, Etawah, India. Electronic address: jitesh141@gmail.com.	journal
method, unclear	1	Full text unavailable	India	0			Full text unavailable	0	0	0	LPW				PubMed		28043537	10.1016/j.ijmyco.2016.10.041	Usefulness of IS6110-based restriction fragment length polymorphism analysis in fingerprinting of Mycobacterium tuberculosis isolates in North India	World Health Organization estimates that approximately one-third of the global community is infected with Mycobatcerium tuberculosis (MTB). Various molecular epidemiology methods were developed and found very promising for assessing the genetic diversity among MTB complex strain. The two major tools restriction fragment length polymorphism (RFLP) and spoligotyping were commonly used in various st…	eng	International journal of mycobacteriology	Int J Mycobacteriol	101615660	2016	Dec		5 Suppl 1		S176-S177	Internet	Jitendra Prasad Mathuria	Mathuria, JP; Anupurba, S	Department of Microbiology, Institute of Medical Sciences, Banaras Hindu University, Varanasi, India; Department of Medical Lab Technology, Paramedical Vigyaan Mahavidhyalaya, Uttar Pradesh University of Medical Sciences, Saifai, Etawah, India. Electronic address: jitesh141@gmail.com.	journal
	1	Full text unavailable	Iran	0			Full text unavailable	0	0	0	LPW				PubMed		28043546	10.1016/j.ijmyco.2016.10.004	Molecular identification of Mycobacterium tuberculosis complex by region of differentiation-typing and polymerase chain reaction-restriction fragment length polymorphism method	Tuberculosis (TB) is one of the most common zoonotic infectious diseases in the world. Identification of Mycobacterium isolates is essential for proper treatment of TB. The aim of this study was to identify Mycobacterium isolates collected from TB patients in Alborz Province, Iran, by region of differentiation (RD)-typing. Fifty samples from tuberculosis patients were cultured in pyruvate and gly…	eng	International journal of mycobacteriology	Int J Mycobacteriol	101615660	2016	Dec		5 Suppl 1		S190	Internet	Seydeh Zeinab Mirzaki	Mirzaki, SZ; Mosavari, N; Nazari, R; Akbarian, M	Department of Microbiology, Qom Branch, Islamic Azad University, Qom, Iran.	journal
hospital	1	full text not available	?	0			Full text unavailable	0	0	0	LPW				PubMed		28043579	10.1016/j.ijmyco.2016.09.071	Deletion of region of difference 181 in Mycobacterium tuberculosis Beijing strains	The region of differences (RDs) polymorphisms is a potential molecular epidemiology method to distinguish origins of Mycobacterium tuberculosis. To date, 68 RDs have been identified in M. tuberculosis. This study was designed to determine the frequency of RD deletions in M. tuberculosis strains that were isolated from patients with pulmonary tuberculosis who were referred to the National Research…	eng	International journal of mycobacteriology	Int J Mycobacteriol	101615660	2016	Dec		5 Suppl 1		S238-S239	Internet	Ehsan Sharifipour	Sharifipour, E; Farnia, P; Mozafari, M; Irani, S; Akbar Velayati, A	Mycobacteriology Research Centre, National Research Institute of Tuberculosis and Lung Disease (NRITLD), Shahid Beheshti University of Medical Sciences, Tehran, Iran.	journal
	1		Angola	1	0	duplicate data	Duplicate	0	0	0	LPW				PubMed	328744	28043599	10.1016/j.ijmyco.2016.09.050	Genetic diversity, transmission dynamics, and drug resistance of Mycobacterium tuberculosis in Luanda, Angola	Despite the important role that the African region plays in a global tuberculosis (TB) epidemiological context, many countries in the region still lack data on the prevalence of specific Mycobacterium tuberculosis strains and drug resistance. This is the case for Angola, which presently lacks any data concerning drug-resistance rates and prevalence of specific M. tuberculosis genotypes and respec…	eng	International journal of mycobacteriology	Int J Mycobacteriol	101615660	2016	Dec		5 Suppl 1		S38-S39	Internet	João Perdigão	Perdigão, J; Clemente, S; Ramos, J; Masakidi, P; Machado, D; Silva, C; Couto, I; Viveiros, M; Taveira, N; Portugal, I	iMed.ULisboa - Instituto de Investigação do Medicamento, Faculdade de Farmácia, Universidade de Lisboa, Lisboa, Portugal.	journal
	1	Full text unavailable	Ghana	0			Full text unavailable	0	0	0	LPW				PubMed		28043631	10.1016/j.ijmyco.2016.09.051	The First population structure and comparative genomics analysis of Mycobacterium africanum strains from Ghana reveals higher diversity of Lineage 5	Mycobacterium africanum (MAF) remains an important TB causing pathogen in West Africa; however, little is known about its population structure and actual diversity which may have implications for diagnostics and vaccines. We carried out comparative genomics analysis of candidate Mycobacterium tuberculosis (MTB) and MAF using whole genome sequencing.Clinical MTB complex strains (n=187) comprising …	eng	International journal of mycobacteriology	Int J Mycobacteriol	101615660	2016	Dec		5 Suppl 1		S80-S81	Internet	Isaac D Otchere	Otchere, ID; Harris, SR; Busso, SL; Asante-Poku, A; Osei-Wusu, S; Koram, K; Parkhill, J; Gagneux, S; Yeboah-Manu, D	Noguchi Memorial Institute for Medical Research, University of Ghana, Accra, Ghana; Department of Biochemistry, Cell and Molecular Biology, University of Ghana, Accra, Ghana. Electronic address: otchereid@hotmail.com.	journal
hospital	1		China	1	0	Only tested or reported results for Beijing lineage	Did not test or report all genotypes	0	0	0	LPW				PubMed	329880	24667051	10.1017/S0950268814000582	There is no correlation between sublineages and drug resistance of Mycobacterium tuberculosis Beijing/W lineage clinical isolates in Xinjiang, China	The Beijing/W lineage strains are the major prevalent strains in China. The prevalence, mortality and drug-resistant rates of tuberculosis in Xinjiang, Northwestern China are higher than in other parts of the country. Our previous study results showed that the dominant strains of Mycobacterium tuberculosis (MTB) were 'Beijing/W lineage' MTB in Xinjiang; those strains had no significant correlatio…	eng	Epidemiology and infection	Epidemiol Infect	8703737	2015	Jan		143	1	141-9	Internet	L Yuan	Yuan, L; Huang, Y; Mi, LG; Li, YX; Liu, PZ; Zhang, J; Liang, HY; Li, F; Li, H; Zhang, SQ; Li, WJ	Department of Pathogenic Biology and Immunology, School of Medicine,Shihezi University,Shihezi,People's Republic of China.	journal
rflp, unclear	1		South Africa	1	0	Unable to convert RFLP lineages or patterns to phylogenetic lineages	RFLP typing only	0	0	0	KEW				PubMed	329887	25053739	10.1093/infdis/jiu403	Transmission of tuberculosis in a South African community with a high prevalence of HIV infection	In settings of high tuberculosis transmission, little is known of the interaction between human immunodeficiency virus (HIV) positive and HIV-negative tuberculosis disease and of the impact of antiretroviral treatment (ART) programs on tuberculosis transmission dynamics.Mycobacterium tuberculosis isolates were collected from patients with tuberculosis who resided in a South African township with …	eng	The Journal of infectious diseases	J Infect Dis	413675	2015	Jan		211	1	53-61	Internet	Keren Middelkoop	Middelkoop, K; Mathema, B; Myer, L; Shashkina, E; Whitelaw, A; Kaplan, G; Kreiswirth, B; Wood, R; Bekker, LG	Desmond Tutu HIV Centre, Institute of Infectious Disease and Molecular Medicine Department of Medicine.	journal
	1	relapse, reinfection	Malawi	0			Recurrent cases only	0	0	0	KEW				PubMed		25336729	10.1093/infdis/jiu574	Recurrence due to relapse or reinfection with Mycobacterium tuberculosis: a whole-genome sequencing approach in a large, population-based cohort with a high HIV infection prevalence and active follow-up	Recurrent tuberculosis is a major health burden and may be due to relapse with the original strain or reinfection with a new strain.In a population-based study in northern Malawi, patients with tuberculosis diagnosed from 1996 to 2010 were actively followed after the end of treatment. Whole-genome sequencing with approximately 100-fold coverage was performed on all available cultures. Results of …	eng	The Journal of infectious diseases	J Infect Dis	413675	2015	Apr		211	7	1154-63	Internet	José Afonso Guerra-Assunção	Guerra-Assunção, JA; Houben, RM; Crampin, AC; Mzembe, T; Mallard, K; Coll, F; Khan, P; Banda, L; Chiwaya, A; Pereira, RP; McNerney, R; Harris, D; Parkhill, J; Clark, TG; Glynn, JR	Faculty of Epidemiology and Population Health, London School of Hygiene and Tropical Medicine.	journal
unclear	1	not human study	0	0			Not human TB	0	0	0	KEW				PubMed		25340935	10.1378/chest.14-0960	Identification and genotyping of Mycobacterium tuberculosis isolated from water and soil samples of a metropolitan city	The potential role of environmental Mycobacterium tuberculosis in the epidemiology of TB remains unknown. We investigated the transmission of M tuberculosis from humans to the environment and the possible transmission of M tuberculosis from the environment to humans.A total of 1,500 samples were collected from three counties of the Tehran, Iran metropolitan area from February 2012 to January 2014…	eng	Chest	Chest	231335	2015	Apr		147	4	1094-1102	Internet	Ali Akbar Velayati	Velayati, AA; Farnia, P; Mozafari, M; Malekshahian, D; Farahbod, AM; Seif, S; Rahideh, S; Mirsaeidi, M	From the Mycobacteriology Research Centre, National Research Institute of Tuberculosis and Lung Disease (NRITLD), Shahid Beheshti University of Medical Sciences, Tehran, Iran.	journal
	1	duplicate study	Tanzania	0			Duplicate	0	0	0	KEW				PubMed		25522841	10.1016/j.tube.2014.11.006	Genetic diversity of Mycobacterium tuberculosis isolated from tuberculosis patients in the Serengeti ecosystem in Tanzania	This study was part of a larger cross-sectional survey that was evaluating tuberculosis (TB) infection in humans, livestock and wildlife in the Serengeti ecosystem in Tanzania. The study aimed at evaluating the genetic diversity of Mycobacterium tuberculosis isolates from TB patients attending health facilities in the Serengeti ecosystem. DNA was extracted from 214 sputum cultures obtained from c…	eng	Tuberculosis (Edinburgh, Scotland)	Tuberculosis (Edinb)	100971555	2015	Mar		95	2	170-8	Internet	Erasto V Mbugi	Mbugi, EV; Katale, BZ; Siame, KK; Keyyu, JD; Kendall, SL; Dockrell, HM; Streicher, EM; Michel, AL; Rweyemamu, MM; Warren, RM; Matee, MI; van Helden, PD	Department of Biochemistry, Muhimbili University of Health and Allied Sciences, P. O. Box 65001 Dar es Salaam, Tanzania; Departments of Microbiology and Immunology, Muhimbili University of Health and Allied Sciences, P.O. Box 65001 Dar es Salaam, Tanzania. Electronic address: rerasto@yahoo.com.	journal
	1	convenience sample	Guyana and Suriname	0			Convenience sample	0	0	0	LPW				PubMed		25528138	10.1016/j.meegid.2014.12.015	Finer characterization of Mycobacterium tuberculosis using spoligotyping and 15-loci MIRU-VNTRs reveals phylogeographical specificities of isolates circulating in Guyana and Suriname	In this study we used spoligotyping and 15-loci MIRU-VNTRs for a finer characterization of Mycobacterium tuberculosis strains isolated from patients residing in Guyana (n=74) and Suriname (n=80). The mean age of the patients was 38.5years (36.5 and 40.2years for Guyana vs. Suriname), with a male-to-female sex-ratio of 2.25 for Guyana vs. 4.27 in Suriname. Spoligotyping and 15-loci MIRU-VNTRs led …	eng	Infection, genetics and evolution : journal of molecular epidemiology and evolutionary genetics in infectious diseases	Infect Genet Evol	101084138	2015	Mar		30		114-9	Internet	Elisabeth Streit	Streit, E; Baboolal, S; Akpaka, PE; Millet, J; Rastogi, N	WHO Supranational TB Reference Laboratory, Unité de la Tuberculose et des Mycobactéries, Institut Pasteur de Guadeloupe, Abymes Cedex, Guadeloupe.	journal
	1	no original data/full dataset not reported	Taiwan	0			Strain data insufficient or unavailable	0	0	0	LPW				PubMed		25542769	10.1016/j.jfma.2014.07.006	Prevalence of Mycobacterium tuberculosis strain genotypes in Taiwan reveals a close link to ethnic and population migration	Taiwan is a relatively isolated island, serving as a mixing vessel for colonization by different waves of ethnic and migratory groups over the past 4 centuries. The potential transmission pattern of Mycobacterium tuberculosis in different ethnic and migratory populations remains to be elucidated. By using mycobacterial tandem repeat sequences as genetic markers, the prevalence of M. tuberculosis …	eng	Journal of the Formosan Medical Association = Taiwan yi zhi	J Formos Med Assoc	9214933	2015	Jun		114	6	484-8	Internet	Horng-Yunn Dou	Dou, HY; Chen, YY; Kou, SC; Su, IJ	Institute of Infectious Diseases and Vaccinology, National Health Research Institutes, Number 35, Keyan Road, Zhunan Town, Miaoli County 350, Taiwan.	journal
unclear	1	amino-glycoside resistant strains only	Latvia	0			Duplicate	0	0	0	LPW				PubMed		25557624	10.1016/j.diagmicrobio.2014.12.004	Genotypic and phenotypic characteristics of aminoglycoside-resistant Mycobacterium tuberculosis isolates in Latvia	Mutations causing resistance to aminoglycosides, such as kanamycin (KAN), amikacin (AMK), and streptomycin, are not completely understood. In this study, polymorphisms of aminoglycoside resistance influencing genes such as rrs, eis, rpsL, and gidB in 41 drug-resistant and 17 pan-sensitive Mycobacterium tuberculosis clinical isolates in Latvia were analyzed. Mutation A1400G in rrs gene was detecte…	eng	Diagnostic microbiology and infectious disease	Diagn Microbiol Infect Dis	8305899	2015	Mar		81	3	177-82	Internet	Matiss Bauskenieks	Bauskenieks, M; Pole, I; Skenders, G; Jansone, I; Broka, L; Nodieva, A; Ozere, I; Kalvisa, A; Ranka, R; Baumanis, V	Latvian Biomedical Research and Study Centre, Ratsupites Street 1, Riga, LV-1067, Latvia.	journal
unclear	1	strain type not reported	Kazakhstan	0			Strain data insufficient or unavailable	0	0	0	LPW				PubMed		25574916	10.5588/ijtld.14.0305	Mutations in the pncA and rpsA genes among 77 Mycobacterium tuberculosis isolates in Kazakhstan	Pyrazinamide (PZA), an important first-line drug for anti-tuberculosis treatment, demonstrates potent activity against semi-dormant bacilli in acidic environments. However, the diagnosis of PZA resistance is often impeded by technical difficulties.To characterise mutations in the pncA and rpsA genes among PZA-resistant and PZA-susceptible clinical Mycobacterium tuberculosis isolates circulating i…	eng	The international journal of tuberculosis and lung disease : the official journal of the International Union against Tuberculosis and Lung Disease	Int J Tuberc Lung Dis	9706389	2015	Feb		19	2	179-84	Internet	A Akhmetova	Akhmetova, A; Kozhamkulov, U; Bismilda, V; Chingissova, L; Abildaev, T; Dymova, M; Filipenko, M; Ramanculov, E	National Center for Biotechnology of the Republic of Kazakhstan, Astana, Kazakhstan.	journal
	1	strain data not reported	Uganda	0			Strain data insufficient or unavailable	0	0	0	LPW				PubMed		25583212	10.1111/tmi.12459	Identifying locations of recent TB transmission in rural Uganda: a multidisciplinary approach	Targeting high Tuberculosis (TB) transmission sites may offer a novel approach to TB prevention in sub-Saharan Africa. We sought to characterise TB transmission sites in a rural Ugandan township.We recruited adults starting TB treatment in Tororo, Uganda, over 1 year. Fifty four TB cases provided names of frequent contacts, sites of residence, health care, work and social activities, and two sput…	eng	Tropical medicine & international health : TM & IH	Trop Med Int Health	9610576	2015	Apr		20	4	537-45	Internet	Gabriel Chamie	Chamie, G; Wandera, B; Marquez, C; Kato-Maeda, M; Kamya, MR; Havlir, DV; Charlebois, ED	HIV/AIDS Division, Department of Medicine, San Francisco General Hospital, University of California, San Francisco, CA, USA; Makerere University-University of California, San Francisco (MU-UCSF) Research Collaboration, Kampala, Uganda.	journal
	1	Only MDR data is reported	China	0			Drug resistant strains only	0	0	0	LPW				PubMed		25583712	10.1128/AAC.04541-14	Phenotypic and genotypic characterization of pyrazinamide resistance among multidrug-resistant Mycobacterium tuberculosis isolates in Zhejiang, China	To explore the phenotypic and genotypic characterization of pyrazinamide (PZA) resistance among multidrug-resistant Mycobacterium tuberculosis (MDR-TB) isolates in Zhejiang province, a total of 274 MDR-TB isolates were collected. Drug susceptibility testing and spoligotyping were performed on all clinical isolates. In addition, the mutated features of PZA-resistant loci, including pncA and rpsA, …	eng	Antimicrobial agents and chemotherapy	Antimicrob Agents Chemother	315061	2015	Mar		59	3	1690-5	Internet	Qiang Xia	Xia, Q; Zhao, LL; Li, F; Fan, YM; Chen, YY; Wu, BB; Liu, ZW; Pan, AZ; Zhu, M	Zhejiang Prevention and Treatment Center of Tuberculosis, Zhejiang TCM & WM Hospital, Hangzhou, China.	journal
	1	Non random sampling	Japan	0			Biased sampling	0	0	0	LPW				PubMed		25595707	10.1016/j.cmi.2014.09.013	Genetic diversity of Mycobacterium tuberculosis isolates from foreign-born and Japan-born residents in Tokyo	Sequences of the full genomes of 259 clinical isolates of Mycobacterium tuberculosis, obtained from foreign-born and Japan-born patients in Tokyo, Japan, were determined, and a phylogenetic tree constructed by concatenated single-nucleotide polymorphism (SNP) sequences. The 259 isolates were clustered into four clades: Lineage 2 (East Asian or ""Beijing"" genotype; n = 182, 70.3%), Lineage 4 (Eur…	eng	Clinical microbiology and infection : the official publication of the European Society of Clinical Microbiology and Infectious Diseases	Clin Microbiol Infect	9516420	2015	Mar		21	3	248.e1-8	Internet	M Kato-Miyazawa	Kato-Miyazawa, M; Miyoshi-Akiyama, T; Kanno, Y; Takasaki, J; Kirikae, T; Kobayashi, N	Department of Infectious Diseases, Japan.	journal
hospital	1	strain data not reported	Japan	0			Strain data insufficient or unavailable	0	0	0	LPW				PubMed		25732626	10.1016/j.tube.2015.02.040	Sublineages of Mycobacterium tuberculosis Beijing genotype strains and unfavorable outcomes of anti-tuberculosis treatment	The influence of Mycobacterium tuberculosis (MTB) lineages/sublineages on unfavorable tuberculosis (TB) treatment outcomes is poorly understood. We investigated the effects of Beijing genotype sublineages and other factors contributing to treatment outcome. Patients newly diagnosed with sputum smear-positive and culture-positive TB in Hanoi, Vietnam, participated in the study. After receiving ant…	eng	Tuberculosis (Edinburgh, Scotland)	Tuberculosis (Edinb)	100971555	2015	May		95	3	336-42	Internet	Nguyen T L Hang	Hang, NT; Maeda, S; Keicho, N; Thuong, PH; Endo, H	Department of International Affairs and Tropical Medicine, Tokyo Women's Medical University, Tokyo, Japan; National Center for Global Health and Medicine-Bach Mai Hospital (NCGM-BMH) Medical Collaboration Center, Hanoi, Viet Nam. Electronic address: lehang0310@gmail.com.	journal
	1	Only cluster data presented	China	0			Clusters only	0	0	0	LPW				PubMed		25829000	10.1093/cid/civ255	Transmission of Mycobacterium tuberculosis in China: a population-based molecular epidemiologic study	Understanding the transmission of Mycobacterium tuberculosis is essential for the development of efficient tuberculosis control strategies. China has the second-largest tuberculosis burden in the world. Recent transmission and infection with M. tuberculosis, particularly drug-resistant strains, may account for many new tuberculosis cases.We performed a population-based molecular epidemiologic stu…	eng	Clinical infectious diseases : an official publication of the Infectious Diseases Society of America	Clin Infect Dis	9203213	2015	Jul		61	2	219-27	Internet	Chongguang Yang	Yang, C; Shen, X; Peng, Y; Lan, R; Zhao, Y; Long, B; Luo, T; Sun, G; Li, X; Qiao, K; Gui, X; Wu, J; Xu, J; Li, F; Li, D; Liu, F; Shen, M; Hong, J; Mei, J; DeRiemer, K; Gao, Q	Key Laboratory of Medical Molecular Virology of Ministries of Education and Health, Institutes of Biomedical Sciences and Institute of Medical Microbiology, Shanghai Medical College, Fudan University.	journal
	1	repeat data	Indonesia	0			Duplicate	0	0	0	LPW				PubMed		25859998	10.5588/ijtld.14.0350	Mycobacterium tuberculosis genotypic drug resistance patterns and clustering in Jayapura, Papua, Indonesia	Little is known about drug-resistant tuberculosis (TB) and its transmission in Papua, which has one of the highest rates of TB in Indonesia.We examined genotypic drug resistance patterns using multiplex ligation-dependent probe amplification and the degree of molecular clustering using 24-locus mycobacterial interspersed repetitive units-variable number of tandem repeats (MIRU-VNTR) among 199 con…	eng	The international journal of tuberculosis and lung disease : the official journal of the International Union against Tuberculosis and Lung Disease	Int J Tuberc Lung Dis	9706389	2015	Apr		19	4	428-33	Internet	L Chaidir	Chaidir, L; Sengstake, S; de Beer, J; Krismawati, H; Lestari, FD; Ayawaila, S; van Soolingen, D; Anthony, R; van Crevel, R; Alisjahbana, B	Laboratory for Health Research and Community Service, Faculty of Medicine, Universitas Padjadjaran, Bandung, Indonesia.	journal
	1		Israel	1	0	duplicate data	Duplicate	0	0	0	KEW				PubMed	329891	25881717	10.1017/S0950268815000382	Tuberculosis in native Israeli Arabs and Jews: trends and treatment outcomes, 1999-2011	The incidence of tuberculosis (TB) in native ethnic minorities remains high in developed countries. Arabs, the major ethnic minority in Israel, comprise 21% of its population. This retrospective study compared TB incidence, demographic, clinical, laboratory, genotyping characteristics and treatment outcomes in all Israeli-born citizens diagnosed with TB between 1999 and 2011 by ethnicity, i.e. Is…	eng	Epidemiology and infection	Epidemiol Infect	8703737	2015	Nov		143	15	3203-10	Internet	H Bishara	Bishara, H; Goldblatt, D; Rorman, E; Mor, Z	Tuberculosis Clinic,Nazareth Hospital,Nazareth,Israel.	journal
hospital	1		USA	1	0	Only tested or reported results for Beijing lineage	Did not test or report all genotypes	0	0	0	LPW				PubMed	328888	25891279	10.1016/j.meegid.2015.04.012	Is the Beijing strain of Mycobacterium tuberculosis associated with cavitary lung disease?	We conducted a cross-sectional study to describe clinical characteristics of patients with pulmonary tuberculosis with and without evidence of pulmonary cavitation on chest radiography and assess whether cavitation is associated with infection with Mycobacterium tuberculosis Beijing strain. Cases were selected from the Tuberculosis Registry (January 1, 2008-November 1, 2011) of the Florida Depart…	eng	Infection, genetics and evolution : journal of molecular epidemiology and evolutionary genetics in infectious diseases	Infect Genet Evol	101084138	2015	Jul		33		2017-01-05	Internet	Helena J Chapman	Chapman, HJ; Phillips, SA; Hosford, JL; Séraphin, MN; Lauzardo, M	Southeastern National Tuberculosis Center, Division of Infectious Diseases and Global Medicine, University of Florida College of Medicine, 2055 Mowry Road, Gainesville, FL 32611, United States. Electronic address: Helena.Chapman@medicine.ufl.edu.	journal
	1		India	0			Strain data insufficient or unavailable	0	0	0	LPW				PubMed		25934327	10.1016/j.jinf.2015.04.028	Genetic diversity and drug susceptibility profile of Mycobacterium tuberculosis isolated from different regions of India	Molecular genotyping profiles of Mycobacterium tuberculosis (MTB) provide a valuable insight into the evolution and transmission of the bacilli. Due to the lack of comprehensive national level data from India on this subject, we performed this study to determine the recent trends and distribution of various MTB lineages circulating in India.A total of 628 MTB isolates were obtained from North, We…	eng	The Journal of infection	J Infect	7908424	2015	Aug		71	2	207-19	Internet	Jitendra Singh	Singh, J; Sankar, MM; Kumar, P; Couvin, D; Rastogi, N; Singh, S; ,	Division of Clinical Microbiology and Molecular Medicine, Department of Laboratory Medicine, All India Institute of Medical Sciences, New Delhi, India.	journal
	1	strain data not reported	Brazil	0			Strain data insufficient or unavailable	0	0	0	LPW				PubMed		25948063	10.1093/cid/civ365	Genotypic and Spatial Analysis of Mycobacterium tuberculosis Transmission in a High-Incidence Urban Setting	Genotyping Mycobacterium tuberculosis isolates allows study of dynamics of tuberculosis transmission, while geoprocessing allows spatial analysis of clinical and epidemiological data. Here, genotyping data and spatial analysis were combined to characterize tuberculosis transmission in Vitória, Brazil, to identify distinct neighborhoods and risk factors associated with recent tuberculosis transmis…	eng	Clinical infectious diseases : an official publication of the Infectious Diseases Society of America	Clin Infect Dis	9203213	2015	Sep		61	5	758-66	Internet	Fabíola Karla Correa Ribeiro	Ribeiro, FK; Pan, W; Bertolde, A; Vinhas, SA; Peres, RL; Riley, L; Palaci, M; Maciel, EL	Graduate Program in Infectious Diseases, Federal University of Espírito Santo, Vitória, Brazil.	journal
	1	English article unavailable	China	0			Not English	0	0	0	LPW				PubMed		25975553		[Study on the population-genetics of Mycobacterium tuberculosis from Sichuan Basin in China]	To explore the population-genetics characteristics of Mycobacterium tuberculosis (MTB) prevailing at the Sichuan basin of China.A total of 413 MTB strains collected from Sichuan basin were genotyped by large sequence polymorphism (LSP) and 15 loci variable number tandem repeat (VNTR). Difference between the distribution of lineage population was analyzed by ?(2)-test and the discriminatory abilit…	chi	Zhonghua liu xing bing xue za zhi = Zhonghua liuxingbingxue zazhi	Zhonghua Liu Xing Bing Xue Za Zhi	8208604	2015	Apr		36	4	374-8	Print	Ying Li	Li, Y; Fu, Y; Yuan, M; Dong, L; Huang, H; Li, W; Gao, J	Zhejiang Provincial Key Laboratory for Technology and Application of Model Organisms, School of Laboratory Medicine and Life Science, Wenzhou Medical University, Wenzhou 325035, China.	journal
	1	unclear sampling	Guinea	0			Unclear sampling method	0	0	0	LPW				PubMed		26004194	10.1016/j.meegid.2015.05.022	First insights into circulating Mycobacterium tuberculosis complex lineages and drug resistance in Guinea	In this study we assessed first-line anti-tuberculosis drug resistance and the genotypic distribution of Mycobacterium tuberculosis complex (MTBC) isolates that had been collected from consecutive new tuberculosis patients enrolled in two clinical trials conducted in Guinea between 2005 and 2010. Among the total 359 MTBC strains that were analyzed in this study, 22.8% were resistant to at least o…	eng	Infection, genetics and evolution : journal of molecular epidemiology and evolutionary genetics in infectious diseases	Infect Genet Evol	101084138	2015	Jul		33		314-9	Internet	Mebrat Ejo	Ejo, M; Gehre, F; Barry, MD; Sow, O; Bah, NM; Camara, M; Bah, B; Uwizeye, C; Nduwamahoro, E; Fissette, K; De Rijk, P; Merle, C; Olliaro, P; Burgos, M; Lienhardt, C; Rigouts, L; de Jong, BC	Institute of Tropical Medicine (ITM), Antwerp, Belgium; University of Gondar, Gondar, Ethiopia.	journal
this study contains a method that is established on known samples and then applied to new samples (only record new samples)	1	unclear sampling method	Thailand	0			Unclear sampling method	0	0	0	LPW				PubMed		26025596	10.1016/j.tube.2015.04.009	Development and application of single-tube multiplex real-time PCR for lineage classification of Mycobacterium tuberculosis based on large sequence polymorphism in Northeast Thailand	An appreciation of the genetic diversity of Mycobacterium tuberculosis (Mtb) is needed for effective planning of strategies in tuberculosis (TB) control. Large sequence polymorphisms (LSPs) are the molecular epidemiological and evolutionary markers for classification of Mtb into East Asian (EA) or Beijing, Indo-Oceanic (IO), Euro-American (EuA) and East African-Indian (EAI) lineages. We aimed to …	eng	Tuberculosis (Edinburgh, Scotland)	Tuberculosis (Edinb)	100971555	2015	Jul		95	4	404-10	Internet	Kiatichai Faksri	Faksri, K; Hanchaina, R; Sangka, A; Namwat, W; Lulitanond, V	Department of Microbiology, Faculty of Medicine, Khon Kaen University, Khon Kaen 40002, Thailand; Research and Diagnostic Center for Emerging Infectious Diseases (RCEID), Khon Kaen University, Khon Kaen 40002, Thailand. Electronic address: kiatichai@kku.ac.th.	journal
	1	Full texdt unavailable	South Africa	0			Full text unavailable	0	0	0	LPW				PubMed		26056111	10.5588/ijtld.14.0563	Molecular typing of drug-susceptible and -resistant Mycobacterium tuberculosis in Johannesburg, South Africa	Knowledge about spoligotyping families of drug-susceptible and drug-resistant Mycobacterium tuberculosis circulating in the Johannesburg area, South Africa, is lacking.To determine the genetic diversity of M. tuberculosis isolates circulating in the Johannesburg area and to compare the results with both national and international databanks.Five hundred cultured M. tuberculosis isolates from withi…	eng	The international journal of tuberculosis and lung disease : the official journal of the International Union against Tuberculosis and Lung Disease	Int J Tuberc Lung Dis	9706389	2015	Jul		19	7	834-40	Internet	P S Kamudumuli	Kamudumuli, PS; Beylis, N; Blann, L; Duse, A	Department of Clinical Microbiology and Infectious Diseases, School of Pathology, University of the Witwatersrand, Johannesburg, Gauteng, South Africa.	journal
	1	convenience sample	Kazhakstan	0			Convenience sample	0	0	0	LPW				PubMed		26076582	10.1016/j.tube.2015.04.012	Molecular snapshot of Mycobacterium tuberculosis population in Kazakhstan: a country-wide study	Republic of Kazakhstan is among the 27 high multidrug-resistant tuberculosis (MDR-TB) burden countries in the world. Here, we analyzed the population structure and phylogeography of Mycobacterium tuberculosis in Kazakhstan and impact of the identified genotypes on spread of drug resistant strains. A total of 159 M. tuberculosis isolates from different regions of Kazakhstan were typed using 24-MIR…	eng	Tuberculosis (Edinburgh, Scotland)	Tuberculosis (Edinb)	100971555	2015	Sep		95	5	538-46	Internet	Yuriy Skiba	Skiba, Y; Mokrousov, I; Ismagulova, G; Maltseva, E; Yurkevich, N; Bismilda, V; Chingissova, L; Abildaev, T; Aitkhozhina, N	Aitkhozhin Institute of Molecular Biology and Biochemistry, Almaty, Kazakhstan. Electronic address: yuriy.skiba@gmail.com.	journal
	1	English article unavailable	Turkey	0			Not English	0	0	0	LPW				PubMed		26167815		[Tuberculosis Laboratory Surveillance Network (TuLSA) study group The first step for national tuberculosis laboratory surveillance: Ankara, 2011]	The most effective method for monitoring country-level drug resistance frequency and to implement the necessary control measures is the establishment of a laboratory-based surveillance system. The aim of this study was to summarize the follow up trend of the drug-resistant tuberculosis (TB) cases, determine the load of resistance and evaluate the capacities of laboratories depending on laboratory…	tur	Mikrobiyoloji bulteni	Mikrobiyol Bul	7503830	2015	Apr		49	2	143-55	Print	Figen Sezen	Sezen, F; Albayrak, N; Özkara, ?; Karagöz, A; Alp, A; Duyar A?ca, F; ?nan Süer, A; Müderris, T; Ceyhan, ?; Durmaz, R; Ertek, M; ,	Public Health Agency of Turkey, National Tuberculosis Reference Laboratory, Ankara, Turkey. nurhanalbayrak@yahoo.com.	journal
	1	strain data not reported	Malawi	0			Strain data insufficient or unavailable	0	0	0	LPW				PubMed		26181760	10.1371/journal.pone.0132840	Whole Genome Sequencing Shows a Low Proportion of Tuberculosis Disease Is Attributable to Known Close Contacts in Rural Malawi	The proportion of tuberculosis attributable to transmission from close contacts is not well known. Comparison of the genome of strains from index patients and prior contacts allows transmission to be confirmed or excluded.In Karonga District, Malawi, all tuberculosis patients are asked about prior contact with others with tuberculosis. All available strains from culture-positive patients were seq…	eng	PloS one	PLoS One	101285081	2015			10	7	e0132840	Internet	Judith R Glynn	Glynn, JR; Guerra-Assunção, JA; Houben, RM; Sichali, L; Mzembe, T; Mwaungulu, LK; Mwaungulu, JN; McNerney, R; Khan, P; Parkhill, J; Crampin, AC; Clark, TG	Faculty of Epidemiology and Population Health, London School of Hygiene & Tropical Medicine, London, United Kingdom.	journal
	1		Cuba	0			Duplicate	0	0	0	KEW				PubMed		26211409	10.1111/tmi.12569	Molecular epidemiology of tuberculosis in Havana, Cuba, 2009	To estimate the proportion of tuberculosis cases attributable to recent transmission and the risk factors possibly associated with tuberculosis clustering.Population-based study combining information from epidemiological investigation of tuberculosis cases notified to the National Tuberculosis Control Program in Havana, Cuba, in 2009 with the results of genotyping of Mycobacterium tuberculosis is…	eng	Tropical medicine & international health : TM & IH	Trop Med Int Health	9610576	2015	Nov		20	11	1534-1542	Internet	Alexander González Díaz	González Díaz, A; Battaglioli, T; Díaz Rodríguez, R; Goza Valdés, R; González Ochoa, E; Van der Stuyft, P	Research and Surveillance Group on TB, Leprosy and ARI, Institute of Tropical Medicine Pedro Kourí, Havana, Cuba.	journal
unclear, method,	1	Seems like a review article? Unclear	Japan	0			Review	0	0	0	LPW				PubMed		26220897	10.1016/j.meegid.2015.07.029	Phylogenetic assignment of Mycobacterium tuberculosis Beijing clinical isolates in Japan by maximum a posteriori estimation	Intra-species phylogeny of Mycobacterium tuberculosis has been regarded as a clue to estimate its potential risk to develop drug-resistance and various epidemiological tendencies. Genotypic characterization of variable number of tandem repeats (VNTR), a standard tool to ascertain transmission routes, has been improving as a public health effort, but determining phylogenetic information from those…	eng	Infection, genetics and evolution : journal of molecular epidemiology and evolutionary genetics in infectious diseases	Infect Genet Evol	101084138	2015	Oct		35		82-8	Internet	Junji Seto	Seto, J; Wada, T; Iwamoto, T; Tamaru, A; Maeda, S; Yamamoto, K; Hase, A; Murakami, K; Maeda, E; Oishi, A; Migita, Y; Yamamoto, T; Ahiko, T	Department of Microbiology, Yamagata Prefectural Institute of Public Health, 1-6-6 Toka-machi, Yamagata-shi, Yamagata 990-0031, Japan. Electronic address: setoj@pref.yamagata.jp.	journal
	1	resist	Brazil	0			Drug resistant strains only	0	0	0	KEW				PubMed		26231661	10.1186/s12879-015-1057-y	Genetic diversity and molecular epidemiology of multidrug-resistant Mycobacterium tuberculosis in Minas Gerais State, Brazil	We aimed to characterize the genetic diversity of drug-resistant Mycobacterium tuberculosis (MTb) clinical isolates and investigate the molecular epidemiology of multidrug-resistant (MDR) tuberculosis from Minas Gerais State, Brazil.One hundred and four MTb clinical isolates were assessed by IS6110-RFLP, 24-locus mycobacterial interspersed repetitive units variable-number tandem repeats (MIRU-VNT…	eng	BMC infectious diseases	BMC Infect Dis	100968551	2015	Aug		15		306	Internet	Nayanne Gama Teixeira Dantas	Dantas, NG; Suffys, PN; Carvalho, Wda S; Gomes, HM; de Almeida, IN; de Assis, LJ; Augusto, CJ; Gomgnimbou, MK; Refregier, G; Sola, C; de Miranda, SS	Post-Graduate Program in Infectious Diseases and Tropical Medicine, Department of Internal medicine, Faculty of Medicine, Federal University of Minas Gerais, Belo Horizonte, Brazil. ngtdantas@gmail.com.	journal
	1	Full text unavailable	China	0			Full text unavailable	0	0	0	LPW				PubMed		26248739	10.3967/bes2015.077	The Epidemiological Characteristics of Beijing Lineage Mycobacterium tuberculosis from a National Referral Center in China	Our study was to investigate the epidemiological characteristics of M.tuberculosis from a national tuberculosis referral center in China. All strains isolated from TB patients, were genotyped by the RD105 deletion, 8 and 51 SNP loci and VNTR. The high differentiation SNPs of modern Beijing strains were analyzed for protein function and structure. 413 M. tuberculosis were included. Of 379 Beijing …	eng	Biomedical and environmental sciences : BES	Biomed Environ Sci	8909524	2015	Jul		28	7	539-43	Print	Xiao Ying Li	Li, XY; Li, Y; Zhang, Y; Kang, WL; Zhao, LP; Ding, PJ; Dai, WT; Huang, HR; Huang, YF; Li, WM	Tianjin Children's Hospital, Tianjin 300074, China.	journal
	1	English article unavailable	China	0			Not English	0	0	0	LPW				PubMed		26310345		[Genotyping of Mycobacterium tuberculosis isolates circulating in Qinghai province by spoligotyping]		chi	Zhonghua yu fang yi xue za zhi [Chinese journal of preventive medicine]	Zhonghua Yu Fang Yi Xue Za Zhi	7904962	2015	Jun		49	6	565-7	Print	Zhaofen Wang	Wang, Z; Li, B; Ma, Y; Jiang, M; Su, X; Ma, B; Liu, S; Qu, S; Zhou, Z; Zhang, X	Departnrent of public health, medical college of Qinghai university, Xihing 810008, China; Email: kristy538@163.com.	journal
	1	strain data not reported	Russia	0			Strain data insufficient or unavailable	0	0	0	LPW				PubMed		26319998	10.1016/j.meegid.2015.08.028	Beijing clades of Mycobacterium tuberculosis are associated with differential survival in HIV-negative Russian patients	We conducted a prospective study to establish factors associated with survival in tuberculosis patients in Russia including social, clinical and pathogen-related genetic parameters. Specifically we wished to determine whether different strains/clades of the Beijing lineage exerted a differential effect of survival. HIV-negative culture-confirmed cases were recruited during 2008-2010 across Samara…	eng	Infection, genetics and evolution : journal of molecular epidemiology and evolutionary genetics in infectious diseases	Infect Genet Evol	101084138	2015	Dec		36		517-23	Internet	Yanina Balabanova	Balabanova, Y; Nikolayevskyy, V; Ignatyeva, O; Kontsevaya, I; Mironova, S; Kovalyov, A; Kritsky, A; Rodionova, Y; Fedorin, I; Casali, N; Hooper, R; Horstmann, RD; Nejentsev, S; Hoffner, S; Nuernberg, P; Drobniewski, F	Clinical TB and HIV Group, Blizard Institute, Queen Mary, University of London, 2 Newark Street, London E12AT, UK; Department of Infectious Diseases, Imperial College London, DuCane Road, London W12 ONN, UK; Robert Koch Institute, Seestraße 10, 13353 Berlin, Germany. Electronic address: yanina.lenz@imperial.ac.uk.	journal
	1	foreign-born population only	USA	0			Immigrants	0	0	0	LPW				PubMed		26325684	10.1016/j.meegid.2015.08.038	Mycobacterium tuberculosis complex transmission is not associated with recent immigration (?5 years) in Florida	As tuberculosis (TB) incidence decreases in the US, foreign-born persons continue to account for a larger proportion of the burden. In these cross-sectional analyses of 1149 culture-confirmed TB cases genotyped using spoligotyping and 24-locus MIRU, we show that over a quarter of cases among the foreign-born population in Florida resulted from recent transmission of the Mycobacterium tuberculosis…	eng	Infection, genetics and evolution : journal of molecular epidemiology and evolutionary genetics in infectious diseases	Infect Genet Evol	101084138	2015	Dec		36		547-51	Internet	Marie Nancy Séraphin	Séraphin, MN; Lauzardo, M	Southern National Tuberculosis Center, Division of Infectious Diseases and Global Medicine, University of Florida College of Medicine, 2055 Mowry Road, P.O. Box 103600, Gainesville, FL 32610, USA. Electronic address: nseraphin@ufl.edu.	journal
unclear	1	resist, insufficient strain data	South Africa	0			Drug resistant strains only	0	0	0	KEW				PubMed		26338863	10.1128/JCM.01414-15	Molecular Epidemiological Interpretation of the Epidemic of Extensively Drug-Resistant Tuberculosis in South Africa	We show that the interpretation of molecular epidemiological data for extensively drug-resistant tuberculosis (XDR-TB) is dependent on the number of different markers used to define transmission. Using spoligotyping, IS6110 DNA fingerprinting, and DNA sequence data, we show that XDR-TB in South Africa (2006 to 2008) was predominantly driven by the acquisition of second-line drug resistance.	eng	Journal of clinical microbiology	J Clin Microbiol	7505564	2015	Nov		53	11	3650-3	Internet	E M Streicher	Streicher, EM; Sampson, SL; Dheda, K; Dolby, T; Simpson, JA; Victor, TC; Gey van Pittius, NC; van Helden, PD; Warren, RM	DST/NRF Centre of Excellence for Biomedical Tuberculosis Research/SAMRC Centre for Tuberculosis Research, Division of Molecular Biology and Human Genetics, Faculty of Medicine and Health Sciences, Stellenbosch University, Tygerberg, South Africa.	journal
this study contains a method that is established on known samples and then applied to new samples (only record new samples)	1	strain data not reported	Uganda	0			Strain data insufficient or unavailable	0	0	0	LPW				PubMed		26423522	10.1186/s12879-015-1121-7	A single-nucleotide-polymorphism real-time PCR assay for genotyping of Mycobacterium tuberculosis complex in peri-urban Kampala	Accurate and high-throughput genotyping of Mycobacterium tuberculosis complex (MTBC) may be important for understanding the epidemiology and pathogenesis of tuberculosis (TB). In this study, we report the development of a LightCycler® real-time PCR single-nucleotide-polymorphism (LRPS) assay for the rapid determination of MTBC lineages/sublineages in minimally processed sputum samples from TB pat…	eng	BMC infectious diseases	BMC Infect Dis	100968551	2015	Sep		15		396	Internet	Eddie M Wampande	Wampande, EM; Hatzios, SK; Achan, B; Mupere, E; Nsereko, M; Mayanja, HK; Eisenach, K; Boom, WH; Gagneux, S; Joloba, ML; ,	Department of Medical Microbiology, College of Health Sciences, School of Biomedical Sciences, Makerere University, P.O BOX 7072, Kampala, Uganda. wamps@covab.mak.ac.ug.	journal
	1	Non random sampling	Canada	0			Biased sampling	0	0	0	LPW				PubMed		26483462	10.1073/pnas.1507071112	Population genomics of Mycobacterium tuberculosis in the Inuit	Nunavik, Québec suffers from epidemic tuberculosis (TB), with an incidence 50-fold higher than the Canadian average. Molecular studies in this region have documented limited bacterial genetic diversity among Mycobacterium tuberculosis isolates, consistent with a founder strain and/or ongoing spread. We have used whole-genome sequencing on 163 M. tuberculosis isolates from 11 geographically isolat…	eng	Proceedings of the National Academy of Sciences of the United States of America	Proc Natl Acad Sci U S A	7505876	2015	Nov		112	44	13609-14	Internet	Robyn S Lee	Lee, RS; Radomski, N; Proulx, JF; Levade, I; Shapiro, BJ; McIntosh, F; Soualhine, H; Menzies, D; Behr, MA	Department of Epidemiology, Biostatistics and Occupational Health, McGill University, Montreal, QC, Canada, H3A 1A2; The Research Institute of the McGill University Health Centre, Montreal, QC, Canada, H4A 3J1; McGill International TB Centre, McGill University Health Centre, Montreal, QC, Canada, H4A 3J1;	journal
hospital, extrapulmonary	1	subpopulation: extrapulmonary TB only	Ethiopia	0			Extrapulmonary TB only	0	0	0	KEW				PubMed		26503529	10.1186/s12879-015-1177-4	Clinical, molecular and drug sensitivity pattern of mycobacterial isolates from extra-pulmonary tuberculosis cases in Addis Ababa, Ethiopia	In conjunction with the spread of HIV infection, tuberculosis (TB) remains a major cause of illness and death worldwide. The Ethiopian national report reveals that extra pulmonary tuberculosis is on the rise and that case detection rate is exceeding that of smear positive or negative cases in many parts of the country. Different studies indicated that host and/or pathogen related factors are asso…	eng	BMC infectious diseases	BMC Infect Dis	100968551	2015	Oct		15		456	Internet	Workneh Korma	Korma, W; Mihret, A; Hussien, J; Anthony, R; Lakew, M; Aseffa, A	Institute of Biotechnology, Addis Ababa University, P.O. Box 62720, Addis Ababa, Ethiopia. Workneh.korma@aau.edu.et.	journal
unclear	1	Review	0	0			Review	0	0	0	KEW				PubMed		26517715	10.1371/journal.pone.0140911	Genetic Structuration, Demography and Evolutionary History of Mycobacterium tuberculosis LAM9 Sublineage in the Americas as Two Distinct Subpopulations Revealed by Bayesian Analyses	Tuberculosis (TB) remains broadly present in the Americas despite intense global efforts for its control and elimination. Starting from a large dataset comprising spoligotyping (n = 21183 isolates) and 12-loci MIRU-VNTRs data (n = 4022 isolates) from a total of 31 countries of the Americas (data extracted from the SITVIT2 database), this study aimed to get an overview of lineages circulating in t…	eng	PloS one	PLoS One	101285081	2015			10	10	e0140911	Internet	Yann Reynaud	Reynaud, Y; Millet, J; Rastogi, N	WHO Supranational TB Reference Laboratory, Tuberculosis and Mycobacteria Unit, Institut Pasteur de la Guadeloupe, Abymes, Guadeloupe, France.	journal
	1	convenience sample	Portugal	0			Convenience sample	0	0	0	LPW				PubMed		26529092	10.1371/journal.pone.0140625	Determinants of the Sympatric Host-Pathogen Relationship in Tuberculosis	Major contributions from pathogen genome analysis and host genetics have equated the possibility of Mycobacterium tuberculosis co-evolution with its human host leading to more stable sympatric host-pathogen relationships. However, the attribution to either sympatric or allopatric categories depends on the resolution or grain of genotypic characterization. We explored the influence on the sympatri…	eng	PloS one	PLoS One	101285081	2015			10	11	e0140625	Internet	Susana David	David, S; Mateus, AR; Duarte, EL; Albuquerque, J; Portugal, C; Sancho, L; Lavinha, J; Gonçalves, G	Departamento de Genética Humana, Instituto Nacional de Saúde Doutor Ricardo Jorge (INSA), Lisboa, Portugal.	journal
unclear, lin2	1	HIV, insufficient strain data	Guatemala	0			HIV-TB coinfection only	0	0	0	KEW				PubMed		26542222	10.1016/j.tube.2015.09.001	Whole genome sequencing identifies circulating Beijing-lineage Mycobacterium tuberculosis strains in Guatemala and an associated urban outbreak	Limited data are available regarding the molecular epidemiology of Mycobacterium tuberculosis (Mtb) strains circulating in Guatemala. Beijing-lineage Mtb strains have gained prevalence worldwide and are associated with increased virulence and drug resistance, but there have been only a few cases reported in Central America. Here we report the first whole genome sequencing of Central American Beij…	eng	Tuberculosis (Edinburgh, Scotland)	Tuberculosis (Edinb)	100971555	2015	Dec		95	6	810-6	Internet	Joseph W Saelens	Saelens, JW; Lau-Bonilla, D; Moller, A; Medina, N; Guzmán, B; Calderón, M; Herrera, R; Sisk, DM; Xet-Mull, AM; Stout, JE; Arathoon, E; Samayoa, B; Tobin, DM	Department of Molecular Genetics and Microbiology and Center for Host-Microbial Interactions, Duke University Medical Center, Durham, NC, USA.	journal
hospital	1	Only reporting strain for mixed infections	China	0			Mixed infections only	0	0	0	LPW				PubMed		26542224	10.1016/j.tube.2015.08.006	An investigation on the population structure of mixed infections of Mycobacterium tuberculosis in Inner Mongolia, China	Mixed infections of Mycobacterium tuberculosis strains have attracted more attention due to their increasing frequencies worldwide, especially in the areas of high tuberculosis (TB) prevalence. In this study, we accessed the rates of mixed infections in a setting with high TB prevalence in Inner Mongolia Autonomous Region of China.A total of 384 M. tuberculosis isolates from the local TB hospital…	eng	Tuberculosis (Edinburgh, Scotland)	Tuberculosis (Edinb)	100971555	2015	Dec		95	6	695-700	Internet	Xiaoying Wang	Wang, X; Liu, H; Wei, J; Wu, X; Yu, Q; Zhao, X; Lyu, J; Lou, Y; Wan, K	Department of Pathophysiology, West China School of Preclinical and Forrensic Medicine, Sichuan University, China; State Key Laboratory for Infectious Disease Prevention and Control, Collaborative Innovation Center for Diagnosis and Treatment of Infectious Diseases, National Institute for Communicable Disease Control and Prevention, Chinese Center for Disease Control and Prevention, Beijing 10220…	journal
hospital	1	MDRTB only	Moldova	0			Drug resistant strains only	0	0	0	LPW				PubMed		26614195	10.5588/ijtld.15.0327	Nosocomial transmission of multidrug-resistant tuberculosis	Nosocomial transmission of multidrug-resistant tuberculosis (MDR-TB) was ascertained by 24-locus mycobacterial interspersed repetitive units-variable number of tandem repeats (MIRU-VNTR) and spoligotyping at four hospitals in the Republic of Moldova, a high MDR-TB burden country. Overall, 5.1% of patients with pan-susceptible TB at baseline were identified with MDR-TB during in-patient treatment.…	eng	The international journal of tuberculosis and lung disease : the official journal of the International Union against Tuberculosis and Lung Disease	Int J Tuberc Lung Dis	9706389	2015	Dec		19	12	1520-3	Internet	V Crudu	Crudu, V; Merker, M; Lange, C; Noroc, E; Romancenco, E; Chesov, D; Günther, G; Niemann, S	Institute of Phthisiopneumology, Chisinau, Republic of Moldova.	journal
hospital, rflp	1	subpopulation: small communities, rflp	Poland	0			Biased sampling	0	0	0	KEW				PubMed		26638538		Epidemiological Analysis of Mycobacterium tuberculosis Strains Isolated from Patients of Small Communities Living in the South-East of Poland	The diversity of Mycobacterium tuberculosis clinical isolates, collected from a single hospital, was analyzed by ligation-mediated PCR techniques: FLiP and FLAP, and hybridization technique, IS6110-RFLP. The isolated strains were divided in terms of location (3 towns of Podkarpackie voivodeship differing in population size) and relationship (8 members of 4 families, each represented by 2 patients…	eng	Polish journal of microbiology	Pol J Microbiol	101229003	2015			64	3	289-93	Print	Anna Zaczek	Zaczek, A; Szwaja, I; Skiba, M; Brzostek, A; Puchalski, C; Lewandowska, K; Dziadek, J		journal
	1	unclear or convenience sampling method	India	0			Unclear sampling method	0	0	0	KEW				PubMed		26701129	10.1371/journal.pone.0145860	Genetic Diversity of Mycobacterium tuberculosis Isolates from Assam, India: Dominance of Beijing Family and Discovery of Two New Clades Related to CAS1_Delhi and EAI Family Based on Spoligotyping and MIRU-VNTR Typing	Tuberculosis (TB) is one of the major public health concerns in Assam, a remote state located in the northeastern (NE) region of India. The present study was undertaken to explore the circulating genotypes of Mycobacterium tuberculosis complex (MTBC) in this region. A total of 189 MTBC strains were collected from smear positive pulmonary tuberculosis cases from different designated microscopy cen…	eng	PloS one	PLoS One	101285081	2015			10	12	e0145860	Internet	Kangjam Rekha Devi	Devi, KR; Bhutia, R; Bhowmick, S; Mukherjee, K; Mahanta, J; Narain, K	Regional Medical Research Centre, N.E. Region (Indian Council of Medical Research), Post Box #105, Dibrugarh 786 001, Assam, India.	journal
	1	English article unavailable	China	0			Not English	0	0	0	LPW				PubMed		26837365		[Study on VNTR diversity of clinical Mycobacterium tuberculosis isolates from Qinghai]	To investigate the variable number tandem repeats (VNTR) genetic polymorphisms, genotyping and distribution pattern of clinical Mycobacterium (M.) tuberculosis isolates from Qinghai province.The clinical M. tuberculosis strains isolated from the patients with tuberculosis and related background data were collected from Qinghai Provincial Center for Disease Control and Prevention from 2009 to 2012…	chi	Zhonghua liu xing bing xue za zhi = Zhonghua liuxingbingxue zazhi	Zhonghua Liu Xing Bing Xue Za Zhi	8208604	2015	Oct		36	10	1158-61	Print	Bin Li	Li, B; Liu, H; Wang, Z; Ma, Y; Su, X; Jiang, M; Wan, K; Liu, S; Zhao, X; Qu, S	Medical School of Qinghai University, Xining 810001, China.	journal
	1	reports only Beijing and drug resistant strains, no detailed methods	Poland	0			Drug resistant strains only	0	0	0	LPW				PubMed		26999963		Drug Resistance and Population Structure of Mycobacterium tuberculosis Beijing Strains Isolated in Poland	In total, 1095 Mycobacterium tuberculosis clinical isolates from 282 patients with drug-resistant and 813 with drug-sensitive tuberculosis (TB) in Poland during 2007-2011 were analysed. Seventy-one (6.5%) patients were found to have strains of Beijing genotype as defined by spoligotyping. The majority of patients were Polish-born; among foreign-born a large proportion came from Chechnya and Vietn…	eng	Polish journal of microbiology	Pol J Microbiol	101229003	2015			64	4	399-401	Print	Monika Kozi?ska	Kozi?ska, M; Augustynowicz-Kope?, E		journal
unclear	1	convenience sample	Guyana and Suriname	0			Convenience sample	0	0	0	LPW				PubMed		27649869	10.1016/j.ijmyco.2015.05.005	Mycobacterium tuberculosis polyclonal infections and microevolution identified by MIRU-VNTRs in an epidemiological study	The advent of molecular typing using MIRU-VNTR mini-satellites has largely facilitated tuberculosis (TB) molecular epidemiological studies. Apart from detecting the chains of transmission and risk factors, these markers have also allowed to study the phenomena of mixed strain infections versus microevolutionary events.An initial set of Mycobacterium tuberculosis strains (n=161) genotyped using sp…	eng	International journal of mycobacteriology	Int J Mycobacteriol	101615660	2015	Sep		4	3	222-7	Internet	Elisabeth Streit	Streit, E; Millet, J; Rastogi, N	WHO Supranational TB Reference Laboratory, TB & Mycobacteria Unit, Institut Pasteur de la Guadeloupe, F97183 Abymes, Guadeloupe.	journal
hospital	1	spoligotypes not in an extractable format	Ethiopia	0			Strain data insufficient or unavailable	0	0	0	LPW				PubMed		23727395	10.1016/j.jmii.2013.03.012	Molecular characterization of Mycobacterium tuberculosis isolated from pulmonary tuberculosis patients in Felege Hiwot Referral Hospital, northwest Ethiopia	Tuberculosis (TB), caused by the Mycobacterium tuberculosis complex (MTBC), is a serious infection in humans and animals. Ethiopia is one of the countries in Sub-Saharan Africa with the highest burden of TB. However, limited information is available on the genotypic characteristics of M. tuberculosis strains infecting humans. The objective of the present study was to characterize the mycobacteria…	eng	Journal of microbiology, immunology, and infection = Wei mian yu gan ran za zhi	J Microbiol Immunol Infect	100956211	2014	Aug		47	4	333-8	Internet	Tewodros Debebe	Debebe, T; Admassu, A; Mamo, G; Ameni, G	Department of Microbiology, Immunology, and Parasitology, College of Medicine and Health Sciences, Bahir Dar University, Bahir Dar, Ethiopia. Electronic address: teddyrozg@yahoo.com.	journal
	1	Only clusters are reported	Morocoo	0			Clusters only	0	0	0	LPW				PubMed		23732366	10.1016/j.meegid.2013.05.023	Contribution of spoligotyping and MIRU-VNTRs to characterize prevalent Mycobacterium tuberculosis genotypes infecting tuberculosis patients in Morocco	In the present study, Mycobacterium tuberculosis complex (MTBC) clinical isolates from culture-positive TB patients in Morocco were studied by spoligotyping and 12-loci MIRU-VNTR typing methods to characterize prevalent genotypes (n = 219 isolates from 208 patients). Spoligotyping resulted in 39 unique patterns and 167 strains in 30 clusters (2-50 strains per cluster). Comparison with internation…	eng	Infection, genetics and evolution : journal of molecular epidemiology and evolutionary genetics in infectious diseases	Infect Genet Evol	101084138	2014	Jan		21		463-71	Internet	Imane Chaoui	Chaoui, I; Zozio, T; Lahlou, O; Sabouni, R; Abid, M; El Aouad, R; Akrim, M; Amzazi, S; Rastogi, N; El Mzibri, M	Unité de Biologie et Recherches Médicales, Centre National de l'Energie, des Sciences et Techniques Nucléaires, Rabat, Morocco. Electronic address: im_chaoui@yahoo.fr.	journal
unclear,	1	Non random sampling	South Africa	0			Biased sampling	0	0	0	LPW				PubMed		23945374	10.1093/infdis/jit443	Associations between human leukocyte antigen class I variants and the Mycobacterium tuberculosis subtypes causing disease	?The development of active tuberculosis disease has been shown to be multifactorial. Interactions between host and bacterial genotype may influence disease outcome, with some studies indicating the adaptation of M. tuberculosis strains to specific human populations. Here we investigate the role of the human leukocyte antigen (HLA) class I genes in this biological process.?Three hundred patients w…	eng	The Journal of infectious diseases	J Infect Dis	413675	2014	Jan		209	2	216-23	Internet	Muneeb Salie	Salie, M; van der Merwe, L; Möller, M; Daya, M; van der Spuy, GD; van Helden, PD; Martin, MP; Gao, XJ; Warren, RM; Carrington, M; Hoal, EG	MRC Centre for Molecular and Cellular Biology and the DST/NRF Centre of Excellence for Biomedical TB Research, Division of Molecular Biology and Human Genetics, Stellenbosch University, Tygerberg.	journal
hospital	1	MDRTB only	South Africa	0			Drug resistant strains only	0	0	0	LPW				PubMed		24363208	10.1007/s15010-013-0572-2	Treatment outcomes of multidrug-resistant tuberculosis patients in Gauteng, South Africa	Multidrug-resistant tuberculosis (MDR-TB) is associated with lengthy treatment, expensive and potentially toxic regimens, and high rates of treatment failure and death. This study describes the outcomes of 351 MDR-TB patients who started treatment between 2004 and 2007 at the provincial MDR-TB referral hospital in Johannesburg, South Africa, and investigates risk factors associated with death.The…	eng	Infection	Infection	365307	2014	Apr		42	2	405-13	Internet	E Marais	Marais, E; Mlambo, CK; Lewis, JJ; Rastogi, N; Zozio, T; Grobusch, MP; Duse, A; Victor, T; Warren, RW	Department of Clinical Microbiology and Infectious Diseases, School of Pathology, University of the Witwatersrand and National Health Laboratory Service, Johannesburg, South Africa, else.marais@gmail.com.	journal
	1	Only report strains for MDRTB	China	0			Drug resistant strains only	0	0	0	LPW				PubMed		24419342	10.1128/AAC.01792-13	Molecular characterization of multidrug-resistant Mycobacterium tuberculosis isolates from China	To investigate the molecular characterization of multidrug-resistant tuberculosis (MDR-TB) isolates from China and the association of specific mutations conferring drug resistance with strains of different genotypes, we performed spoligotyping and sequenced nine loci (katG, inhA, the oxyR-ahpC intergenic region, rpoB, tlyA, eis, rrs, gyrA, and gyrB) for 128 MDR-TB isolates. Our results showed tha…	eng	Antimicrobial agents and chemotherapy	Antimicrob Agents Chemother	315061	2014			58	4	1997-2005	Internet	Li-Li Zhao	Zhao, LL; Chen, Y; Liu, HC; Xia, Q; Wu, XC; Sun, Q; Zhao, XQ; Li, GL; Liu, ZG; Wan, KL	National Institute for Communicable Disease Control and Prevention, Chinese Center for Disease Control and Prevention/State Key Laboratory for Infectious Disease Prevention and Control, Beijing, China.	journal
	1	Methods unclear, MDR only	China	0			Drug resistant strains only	0	0	0	LPW				PubMed		24439458	10.1016/j.ijantimicag.2013.12.007	Beijing genotype of Mycobacterium tuberculosis is significantly associated with linezolid resistance in multidrug-resistant and extensively drug-resistant tuberculosis in China	Linezolid (LNZ) is a promising antimicrobial agent for the treatment of multidrug-resistant (MDR) and extensively drug-resistant (XDR) tuberculosis (TB). To investigate the efficacy of LNZ among MDR-TB and XDR-TB in China, the LNZ susceptibility of 158 MDR-TB isolates from the national drug resistance survey was determined by the minimum inhibitory concentration method. The 158 MDR-TB isolates we…	eng	International journal of antimicrobial agents	Int J Antimicrob Agents	9111860	2014	Mar		43	3	231-5	Internet	Zhijian Zhang	Zhang, Z; Pang, Y; Wang, Y; Liu, C; Zhao, Y	Respiratory Diseases Department of Nanlou, Chinese People's Liberation Army General Hospital, 28# Fuxing Road, Haidian District, Beijing 100853, China.	journal
method	1	No strain data available	China	0			Strain data insufficient or unavailable	0	0	0	LPW				PubMed		24586989	10.1371/journal.pone.0089726	Development of a hierarchical variable-number tandem repeat typing scheme for Mycobacterium tuberculosis in China	Molecular typing based on variable-number tandem repeats (VNTR) analysis is a promising tool for identifying transmission of Mycobacterium tuberculosis. However, the currently proposed 15- and 24-locus VNTR sets (VNTR-15/24) only have limited resolution and contain too many loci for large-scale typing in high burden countries. To develop an optimal typing scheme in China, we evaluated the resolut…	eng	PloS one	PLoS One	101285081	2014			9	2	e89726	Internet	Tao Luo	Luo, T; Yang, C; Pang, Y; Zhao, Y; Mei, J; Gao, Q	Key Laboratory of Medical Molecular Virology of Ministries of Education and Health, Institutes of Biomedical Sciences and Institute of Medical Microbiology, School of Basic Medical Sciences, Fudan University, Shanghai, China.	journal
	1	strain data not reported	South Africa	0			Strain data insufficient or unavailable	0	0	0	LPW				PubMed		24609068	10.1093/ije/dyu044	Factors affecting tuberculosis strain success over 10 years in a high TB- and HIV-burdened community	Factors associated with Mycobacterium tuberculosis (Mtb) strain success over time in high burdened communities are unknown.Mtb isolates collected over 10 years from sputum-positive tuberculosis (TB) patients resident in the study site underwent IS6110-based restriction fragment length polymorphism analysis. Clinical, demographic and social data were extracted from clinic records and interviewer-a…	eng	International journal of epidemiology	Int J Epidemiol	7802871	2014	Aug		43	4	1114-22	Internet	Keren Middelkoop	Middelkoop, K; Bekker, LG; Mathema, B; Myer, L; Shashkina, E; Whitelaw, A; Kurepina, N; Kaplan, G; Kreiswirth, B; Wood, R	Desmond Tutu HIV Centre, Institute of Infectious Disease & Molecular Medicine, University of Cape Town, Cape Town, South Africa, Department of Medicine, University of Cape Town, Cape Town, South Africa, Department of Epidemiology, Mailman School of Public Health, Columbia University, NY, New York, USA, Public Health Research Institute, Tuberculosis Center, New Jersey Medical School, Rutgers, Stat…	journal
method, unclear	1	Only cluster data presented	Korea	0			Clusters only	0	0	0	LPW				PubMed		24624214	10.4046/trd.2014.76.2.59	Optimal Combination of VNTR Typing for Discrimination of Isolated Mycobacterium tuberculosis in Korea	Variable-number tandem repeat (VNTR) typing is a promising method to discriminate the Mycobacterium tuberculosis isolates in molecular epidemiology. The purpose of this study is to determine the optimal VNTR combinations for discriminating isolated M. tuberculosis strains in Korea.A total of 317 clinical isolates collected throughout Korea were genotyped by using the IS6110 restriction fragment l…	eng	Tuberculosis and respiratory diseases	Tuberc Respir Dis (Seoul)	101479418	2014	Feb		76	2	59-65	Print	Jihye Lee	Lee, J; Kang, H; Kim, S; Yoo, H; Kim, HJ; Park, YK	Korean Institute of Tuberculosis, Cheongwon, Korea.	journal
unclear	1	insufficient strain data	USA	0			Strain data insufficient or unavailable	0	0	0	KEW				PubMed		24670563	10.5588/ijtld.13.0684	Characterizing tuberculosis genotype clusters along the United States-Mexico border	We examined the growth of tuberculosis (TB) genotype clusters during 2005-2010 in the United States, categorized by country of origin and ethnicity of the index case and geographic proximity to the US-Mexico border at the time of TB diagnosis. Nationwide, 38.9% of cases subsequent to Mexico-born index cases were US-born. Among clusters following US-born Hispanic and US-born non-Hispanic index cas…	eng	The international journal of tuberculosis and lung disease : the official journal of the International Union against Tuberculosis and Lung Disease	Int J Tuberc Lung Dis	9706389	2014	Mar		18	3	289-91	Internet	B J Baker	Baker, BJ; Moonan, PK	Epidemic Intelligence Service, and Division of Tuberculosis Elimination, Centers for Disease Control and Prevention, Atlanta, Georgia, USA.	journal
	1	strain data not reported	UK	0			Strain data insufficient or unavailable	0	0	0	KEW				PubMed		24717625	10.1016/S2213-2600(14)70027-X	Assessment of Mycobacterium tuberculosis transmission in Oxfordshire, UK, 2007-12, with whole pathogen genome sequences: an observational study	Patients born outside the UK have contributed to a 20% rise in the UK's tuberculosis incidence since 2000, but their effect on domestic transmission is not known. Here we use whole-genome sequencing to investigate the epidemiology of tuberculosis transmission in an unselected population over 6 years.We identified all residents with Oxfordshire postcodes with a Mycobacterium tuberculosis culture o…	eng	The Lancet. Respiratory medicine	Lancet Respir Med	101605555	2014	Apr		2	4	285-92	Internet	Timothy M Walker	Walker, TM; Lalor, MK; Broda, A; Saldana Ortega, L; Morgan, M; Parker, L; Churchill, S; Bennett, K; Golubchik, T; Giess, AP; Del Ojo Elias, C; Jeffery, KJ; Bowler, IC; Laurenson, IF; Barrett, A; Drobniewski, F; McCarthy, ND; Anderson, LF; Abubakar, I; Thomas, HL; Monk, P; Smith, EG; Walker, AS; Crook, DW; Peto, TE; Conlon, CP	Nuffield Department of Medicine, University of Oxford, Oxford, UK; Department of Microbiology and Infectious Disease, Oxford University Hospitals NHS Trust, Oxford, UK. Electronic address: timothy.walker@ndm.ox.ac.uk.	journal
hospital	1	Unclear sampling, but very thorough data	Iraq	0			Unclear sampling method	0	0	0	LPW				PubMed		24719873	10.1155/2014/580981	Molecular epidemiology and genotyping of Mycobacterium tuberculosis isolated in Baghdad	Tuberculosis (TB) remains a major health problem in Iraq but the strains responsible for the epidemic have been poorly characterized. Our aim was to characterize the TB strains circulating in Bagdad (Iraq). A total of 270 Mycobacterium tuberculosis complex (MTBC) strains isolated between 2010 and 2011 from TB patients attending the Center of Chest and Respiratory diseases in Baghdad were analyzed…	eng	BioMed research international	Biomed Res Int	101600173	2014			2014		580981	Internet	Ruqaya Mustafa Ali	Mustafa Ali, R; Trovato, A; Couvin, D; Al-Thwani, AN; Borroni, E; Dhaer, FH; Rastogi, N; Cirillo, DM	Genetic Engineering and Biotechnology Institute for Post Graduate Studies, University of Baghdad, 10070 Jadriyah, Baghdad, Iraq.	journal
unclear	1	resist	China	0			Drug resistant strains only	0	0	0	KEW				PubMed		24724099	10.1155/2014/763204	Suitability of IS6110-RFLP and MIRU-VNTR for differentiating spoligotyped drug-resistant mycobacterium tuberculosis clinical isolates from Sichuan in China	Genotypes of Mycobacterium tuberculosis complex (MTBC) vary with the geographic origin of the patients and can affect tuberculosis (TB) transmission. This study was aimed to further differentiate spoligotype-defined clusters of drug-resistant MTBC clinical isolates split in Beijing (n = 190) versus non-Beijing isolates (n = 84) from Sichuan region, the second high-burden province in China, by IS6…	eng	BioMed research international	Biomed Res Int	101600173	2014			2014		763204	Internet	Chao Zheng	Zheng, C; Zhao, Y; Zhu, G; Li, S; Sun, H; Feng, Q; Luo, M; Wu, F; Li, X; Hill, V; Rastogi, N; Sun, Q	Key Laboratory of Bio-Resources and Eco-Environment of the Ministry of Education, College of Life Sciences, Sichuan University, Chengdu, Sichuan 610065, China.	journal
	1	No strain data available	China	0			Strain data insufficient or unavailable	0	0	0	LPW				PubMed		24733464	10.1128/AAC.02426-14	Prevalence and molecular characteristics of drug-resistant Mycobacterium tuberculosis in Hunan, China	To determine the prevalence and molecular characteristics of drug-resistant tuberculosis in Hunan province, drug susceptibility testing and spoligotyping methods were performed among 171 M. tuberculosis isolates. In addition, the mutated characteristics of 12 loci, including katG, inhA, rpoB, rpsL, nucleotides 388 to 1084 of the rrs gene [rrs(388-1084)], embB, pncA, tlyA, eis, nucleotides 1158 to…	eng	Antimicrobial agents and chemotherapy	Antimicrob Agents Chemother	315061	2014	Jun		58	6	3475-80	Internet	Li-li Zhao	Zhao, LL; Chen, Y; Chen, ZN; Liu, HC; Hu, PL; Sun, Q; Zhao, XQ; Jiang, Y; Li, GL; Tan, YH; Wan, KL	National Institute for Communicable Disease Control and Prevention, Chinese Center for Disease Control and Prevention/State Key Laboratory for Infectious Disease Prevention and Control/National Reference Laboratory of Tuberculosis, Beijing, China Collaborative Innovation Center for Diagnosis and Treatment of Infectious Diseases, Hangzhou, China.	journal
unclear	1	Territory	Guadeloupe, French Guiana, and Martinique	0			Drug resistant strains only	0	0	0	LPW				PubMed		24738068	10.1155/2014/689852	A systematic follow-up of Mycobacterium tuberculosis drug-resistance and associated genotypic lineages in the French Departments of the Americas over a seventeen-year period	THE population of the French Departments of the Americas (FDA) is highly influenced by the intense migratory flows with mainland france and surrounding countries of the Caribbean and Latin America, some of which have high incidence rates of tuberculosis (Haiti: 230/100,000; Guyana: 111/100,000; and Suriname: 145/100,000) and drug resistance. Since the development of drug resistance to conventiona…	eng	BioMed research international	Biomed Res Int	101600173	2014			2014		689852	Internet	Julie Millet	Millet, J; Streit, E; Berchel, M; Bomer, AG; Schuster, F; Paasch, D; Vanhomwegen, J; Cadelis, G; Rastogi, N	WHO Supranational TB Reference Laboratory, Unité de la Tuberculose et des Mycobactéries, Institut Pasteur de Guadeloupe, 97183 Abymes, Guadeloupe, France.	journal
	1	English article unavailable	Chile	0			Not English	0	0	0	LPW				PubMed		24740770	10.4067/S0716-10182014000100003	[Presence of Bejing genotype among Mycobacterium tuberculosis strains in two centres of the Region Metropolitana of Chile]	Genotyping of Mycobacterium tuberculosis complex (cMtb) allows us to know geographically predominant lineages. Some lineages spread more rapidly and are associated with multidrug resistance, particularly Beijing, which has been reported in Latin America (Peru). There is little information about this topic in Chile and there are no reports of the presence of the Beijing genotype.To determine the m…	spa	Revista chilena de infectologia : organo oficial de la Sociedad Chilena de Infectologia	Rev Chilena Infectol	9305754	2014	Feb		31	1	21-7	Print	Paulina Meza	Meza, P; Balcells, ME; Miranda, C; Cifuentes, M; Wozniak, A; García, P		journal
	1	sampling method unclear	Congo	0			Unclear sampling method	0	0	0	LPW				PubMed		24743770	10.1371/journal.pone.0095083	First evaluation of drug-resistant Mycobacterium tuberculosis clinical isolates from Congo revealed misdetection of fluoroquinolone resistance by line probe assay due to a double substitution T80A-A90G in GyrA	Tuberculosis (TB) is one of the major public health problems in Congo. However, data concerning Mycobacterium tuberculosis drug resistance are lacking because of the insufficient processing capacity. So, the aim of this study was to investigate for the first time the resistance patterns and the strain lineages of a sample of M. tuberculosis complex (MTBC) isolates collected in the two main cities…	eng	PloS one	PLoS One	101285081	2014			9	4	e95083	Internet	Alexandra Aubry	Aubry, A; Sougakoff, W; Bodzongo, P; Delcroix, G; Armand, S; Millot, G; Jarlier, V; Courcol, R; Lemaître, N	UPMC Université, Paris, France; INSERM U1135, Paris, France; Centre National de Référence des Mycobactéries et de la Résistance des Mycobactéries aux Antituberculeux, Paris, France.	journal
	1	Non random sampling	Colombia	0			Biased sampling	0	0	0	LPW				PubMed		24747767	10.1371/journal.pone.0093848	Population structure among mycobacterium tuberculosis isolates from pulmonary tuberculosis patients in Colombia	Phylogeographic composition of M. tuberculosis populations reveals associations between lineages and human populations that might have implications for the development of strategies to control the disease. In Latin America, lineage 4 or the Euro-American, is predominant with considerable variations among and within countries. In Colombia, although few studies from specific localities have reveale…	eng	PloS one	PLoS One	101285081	2014			9	4	e93848	Internet	Teresa Realpe	Realpe, T; Correa, N; Rozo, JC; Ferro, BE; Ferro, BE; Gomez, V; Zapata, E; Ribon, W; Puerto, G; Castro, C; Nieto, LM; Diaz, ML; Rivera, O; Couvin, D; Rastogi, N; Arbelaez, MP; Robledo, J	Corporación para Investigaciones Biológicas, CIB, Medellín, Colombia; Universidad Pontificia Bolivariana, Medellín, Colombia; Centro Colombiano de Investigación en Tuberculosis, CCITB, Medellín, Colombia.	journal
	1	Non random sampling	Mexico	0			Biased sampling	0	0	0	LPW				PubMed		24850349	10.1128/JCM.01043-14	Comparative Mycobacterium tuberculosis spoligotype distribution in Mexico	In the present work, we studied the genetic diversity of Mycobacterium tuberculosis clinical isolates from patients according to their gender, age, and geographic location in Mexico. We did not observe any statistically significant differences in regard to age or gender. We found that spoligo international type 53 (SIT53) is more frequent in the northern states and that SIT119 predominates in cen…	eng	Journal of clinical microbiology	J Clin Microbiol	7505564	2014	Aug		52	8	3049-52	Internet	Lucio Vera-Cabrera	Vera-Cabrera, L; Ramos-Alvarez, J; Molina-Torres, CA; Rivera-Morales, LG; Rendón, A; Quiñones-Falconi, F; Ocampo-Candiani, J	Servicio de Dermatología, Hospital Universitario, UANL, Monterrey, Mexico drluciovera@yahoo.com.	journal
hospital	1		Panama	1	0	overlapping data with unpublished data we received from Amador Goodridge	Did not test or report all genotypes	0	0	0	LPW				PubMed	329690	24865686	10.4269/ajtmh.14-0134	Mycobacterium tuberculosis isolates from single outpatient clinic in Panama City exhibit wide genetic diversity	Understanding Mycobacterium tuberculosis biodiversity and transmission is significant for tuberculosis control. This short report aimed to determine the genetic diversity of M. tuberculosis isolates from an outpatient clinic in Panama City. A total of 62 M. tuberculosis isolates were genotyped by 12 loci mycobacterial interspersed repetitive units-variable number of tandem repeats (MIRU-VNTR) and…	eng	The American journal of tropical medicine and hygiene	Am J Trop Med Hyg	370507	2014	Aug		91	2	310-2	Internet	Dilcia Sambrano	Sambrano, D; Correa, R; Almengor, P; Domínguez, A; Vega, S; Goodridge, A	Tuberculosis Biomarker Research Unit, Centro de Biología Celular y Molecular de las Enfermedades (CBCME) del Instituto de Investigaciones Científicas y Servicios de Alta Tecnología (INDICASAT AIP), Ciudad del Saber, Panamá; Department of Biotechnology, Acharya Nagarjuna University, Guntur, India; Laboratorio Clínico, Complejo Hospitalario Metropolitano Dr. Arnulfo Arias Madrid, Caja de Seguro Soc…	journal
	1	strain data not reported	China	0			Strain data insufficient or unavailable	0	0	0	KEW				PubMed		24941878	10.1111/1469-0691.12726	Role of casual contacts in the recent transmission of tuberculosis in settings with high disease burden	Tuberculosis (TB) remains a major cause of morbidity and mortality worldwide. It is expected that combining multiple molecular methods will further help in focusing contact investigations. We performed a population-based molecular epidemiological study in six sites in China between 1 June 2009 and 31 December 2010. A genotyping method combining 7-loci MIRU-VNTR and IS6110-based RFLP was employed …	eng	Clinical microbiology and infection : the official publication of the European Society of Clinical Microbiology and Infectious Diseases	Clin Microbiol Infect	9516420	2014	Nov		20	11	1140-5	Internet	W Wang	Wang, W; Mathema, B; Hu, Y; Zhao, Q; Jiang, W; Xu, B	Department of Epidemiology, School of Public Health, Fudan University, Shanghai, China; Key Laboratory of Public Health Safety (Ministry of Education), Shanghai, China.	journal
	1	LAM strain only	China	0			Did not test or report all genotypes	0	0	0	LPW				PubMed		24956435	10.1016/j.meegid.2014.06.011	Stranger in a strange land: Ibero-American strain of Mycobacterium tuberculosis in Tibet, China	The Latin-American-Mediterranean (LAM) family is among the largest, diverse and intriguing within Mycobacterium tuberculosis. Widespread in some world regions, as justly reflected by its name, LAM remains in the shadow of the Beijing and East-African Indian families in East Asia. Here, we applied evolutionarily robust markers to the spoligotyped collection of 699 M. tuberculosis clinical isolates…	eng	Infection, genetics and evolution : journal of molecular epidemiology and evolutionary genetics in infectious diseases	Infect Genet Evol	101084138	2014	Aug		26		323-6	Internet	Igor Mokrousov	Mokrousov, I; Jiao, WW; Wan, K; Shen, A	Key Laboratory of Major Diseases in Children and National Key Discipline of Pediatrics (Capital Medical University), Ministry of Education, Beijing Pediatric Research Institute, Beijing Children's Hospital, Capital Medical University, Beijing, China; Laboratory of Molecular Microbiology, St. Petersburg Pasteur Institute, St. Petersburg, Russia. Electronic address: imokrousov@mail.ru.	journal
	1	MDRTB only	Zimbabwe	0			Drug resistant strains only	0	0	0	LPW				PubMed		24967101	10.1155/2014/349141	Prevalence of Extensively Drug Resistant Tuberculosis among Archived Multidrug Resistant Tuberculosis Isolates in Zimbabwe	We conducted a cross-sectional study of second line drug resistance patterns and genetic diversity of MDR-TB isolates archived at the BRTI-TB Laboratory, Harare, between January 2007 and December 2011. DSTs were performed for second line antituberculosis drugs. XDR-TB strains were defined as MDR-TB strains with resistance to either kanamycin and ofloxacin or capreomycin and ofloxacin. Strain type…	eng	Tuberculosis research and treatment	Tuberc Res Treat	101576351	2014			2014		349141	Print	Tichaona Sagonda	Sagonda, T; Mupfumi, L; Manzou, R; Makamure, B; Tshabalala, M; Gwanzura, L; Mason, P; Mutetwa, R	Biomedical Research and Training Institute, Harare, Zimbabwe ; Department of Medical Laboratory Sciences, University of Zimbabwe, Harare, Zimbabwe.	journal
	1	convenience sample	Pakistan	0			Convenience sample	0	0	0	LPW				PubMed		24981519	10.1016/j.meegid.2014.06.017	Multi-drug resistant Mycobacterium tuberculosis complex genetic diversity and clues on recent transmission in Punjab, Pakistan	Multi-Drug Resistant Tuberculosis (MDR-TB), i.e. bacilli resistant to rifampicin (RIF) and isoniazid (INH), is a major Public Health concern in Pakistan according to WHO estimates (3.5% and 32% of new and retreated cases, respectively). Previous Pakistanis reports identified a correlation between being MDR and belonging to Beijing or EAI lineages in one study, and belonging to ""H4""-Ural Euro-Am…	eng	Infection, genetics and evolution : journal of molecular epidemiology and evolutionary genetics in infectious diseases	Infect Genet Evol	101084138	2014	Oct		27		2017-06-14	Internet	Memona Yasmin	Yasmin, M; Gomgnimbou, MK; Siddiqui, RT; Refrégier, G; Sola, C	Health Biotechnology Division, National Institute for Biotechnology and Genetic Engineering (NIBGE), P.O. Box# 577, Jhang Road, Faisalabad, Pakistan; Pakistan Institute of Engineering and Applied Sciences (PIEAS), P.O. Nilore, Islamabad, Pakistan.	journal
	1	convenience sampling	Saudi Arabia	0			Convenience sample	0	0	0	LPW				PubMed		25014484	10.1089/mdr.2014.0065	Occurrence of diverse mutations in isoniazid- and rifampicin-resistant Mycobacterium tuberculosis isolates from autochthonous and immigrant populations of Saudi Arabia	For the first time in Saudi Arabia, the impact of a patient's ethnic background on mutations conferring resistance to rifampicin (RIF) and isoniazid (INH) in Mycobacterium tuberculosis isolates was analyzed on a nationwide sample collection. Four hundred fifteen isolates were subjected to drug susceptibility testing, mutation analysis, spoligotyping, and 24 loci-based Mycobacterial Interspersed R…	eng	Microbial drug resistance (Larchmont, N.Y.)	Microb Drug Resist	9508567	2014	Dec		20	6	623-31	Internet	Bright Varghese	Varghese, B; Shoukri, M; Memish, Z; Abuljadayel, N; Alhakeem, R; Alrabiah, F; Al-Hajoj, S	1 Mycobacteriology Research Section, Department of Infection and Immunity, King Faisal Specialist Hospital and Research Centre , Riyadh, Saudi Arabia .	journal
	1	English article unavailable	Russia	0			Not English	0	0	0	LPW				PubMed		25080813		[Identification of ubiquitous and endemic Mycobacterium tuberculosis genotypes in the Republic of Buryatia]	The MIRU-12 and MIRU-24 methods were used for genotyping and estimation of M. tuberculosis population structure in Buryatia. It was studied in 283 strains isolated from individuals from the regional TB dispensary and medical clinics of the penitentiary system of the republic. It was found that the prevalence of pandemic genotypes Beijing MIT17 and MIT16 and also subtype Beijing MIT642 (24.5% - 46…	rus	Molekuliarnaia genetika, mikrobiologiia i virusologiia	Mol Gen Mikrobiol Virusol	9315607	2014				2	2017-12-06	Print	S N Zhdanova	Zhdanova, SN; Ogarkov, OB; Lats, AA; Zarbuev, AN; Badleeva, MB; Untanova, LS; Savilov, ED		journal
rflp	1	insufficient strain data, duplicate study	Iran	0			Strain data insufficient or unavailable	0	0	0	KEW				PubMed		25140200		Comparison of the genetic convergence between mycobacterium strains by three RFLP-based methods in central province of Iran	The utilization of molecular techniques in the epidemiology of tuberculosis have provided an opportunity for using effective markers to trace the transmission of the disease. The purpose of this study was to compare the genetic patterns of Mycobacterium tuberculosis by three methods of RFLP technique.In a cross-sectional and prospective study, 95 strains of M. tuberculosis isolates were selected …	eng	Iranian journal of basic medical sciences	Iran J Basic Med Sci	101517966	2014	Jun		17	6	401-5	Print	Aliasghar Farazi	Farazi, A; Jabbariasl, M; Tadayon, K; Mossavar, N; Keshavarz, R; Hoseini, SD	Department of Infectious Diseases, Arak University of Medical Sciences, Arak, Iran.	journal
	1	Repeat data -- values are slightly different??	Australia	0			Duplicate	0	0	0	LPW				PubMed		25149181	10.1186/1471-2334-14-455	Temporal dynamics of Mycobacterium tuberculosis genotypes in New South Wales, Australia	Molecular epidemiology of Mycobacterium tuberculosis, its transmission dynamics and population structure have become important determinants of targeted tuberculosis control programs. Here we describe recent changes in the distribution of M. tuberculosis genotypes in New South Wales (NSW), Australia and compared strain types with drug resistance, site of disease and demographic data.We evaluated a…	eng	BMC infectious diseases	BMC Infect Dis	100968551	2014	Aug		14		455	Internet	Ulziijargal Gurjav	Gurjav, U; Jelfs, P; McCallum, N; Marais, BJ; Sintchenko, V	Sydney Medical School and the Marie Bashir Institute for Infectious Diseases and Biosecurity, The University of Sydney, Sydney, Australia. vitali.sintchenko@sydney.edu.au.	journal
	1	unclear or convenience sampling method	Brazil	0			Unclear sampling method	0	0	0	KEW				PubMed		25202909	10.1371/journal.pone.0107106	First baseline of circulating genotypic lineages of Mycobacterium tuberculosis in patients from the brazilian borders with Argentina and Paraguay	At the triple border Brazil/Paraguay/Argentina there is easy mobility from one city to another for economic and tourism activities. This constant and fast population mobility is mainly to visit Iguazu Falls, in the Iguazu River, on the border of the Brazilian state of Paraná and the Argentina. As the incidence of tuberculosis is high in this setting, our study aimed to establish a first baseline …	eng	PloS one	PLoS One	101285081	2014			9	9	e107106	Internet	Luzia Neri C Machado	Machado, LN; Marcondes, NR; Leite, CQ; Santos, AC; Pavan, FR; Baldin, VP; Castilho, AL; Siqueira, VL; Baeza, LC; Berghs, H; Cardoso, RF	Postgraduate Program in Biosciences and Physiopatology, State University of Maringá, Maringá, Paraná, Brazil.	journal
	1	sampling method unclear	China	0			Unclear sampling method	0	0	0	LPW				PubMed		25237849	10.1371/journal.pone.0106787	Genotypic diversity analysis of Mycobacterium tuberculosis strains collected from Beijing in 2009, using spoligotyping and VNTR typing	Tuberculosis (TB) is a serious problem in China. While there have been some studies on the nationwide genotyping of Mycobacterium tuberculosis (M. tuberculosis), there has been little detailed research in Beijing, the capital of China, which has a huge population. Here, M. tuberculosis clinical strains collected in Beijing during 2009 were genotyped by classical methods.Our aim was to analyze the…	eng	PloS one	PLoS One	101285081	2014			9	9	e106787	Internet	Yi Liu	Liu, Y; Tian, M; Wang, X; Wei, R; Xing, Q; Ma, T; Jiang, X; Li, W; Zhang, Z; Xue, Y; Zhang, X; Wang, W; Wang, T; Hong, F; Zhang, J; Wang, S; Li, C	The Key Laboratory for Cell Proliferation and Regulation Biology, Ministry of Education, College of Life Sciences, Beijing Normal University, Haidian District, Beijing, China; Department of Bacteriology and Immunology, Beijing Key Laboratory on Drug-resistant Tuberculosis Research, Beijing Tuberculosis and Thoracic Tumor Research Institute/Beijing Chest Hospital, Capital Medical University, Tongz…	journal
	1	sampling method unclear	Portugal	0			Unclear sampling method	0	0	0	LPW				PubMed		25270633	10.1016/j.ijantimicag.2014.06.021	Mycobacterial interspersed repetitive unit typing and mutational profile for multidrug-resistant and extensively drug-resistant tuberculosis surveillance in Portugal: a 3-year period overview	Multidrug tuberculosis (MDR-TB) and extensively drug-resistant tuberculosis (XDR-TB) cases constitute a serious health problem in Portugal, of which the majority of isolates belong to the Lisboa family and the Q1 cluster, highly related to the Lisboa family. Here we sought to investigate the molecular basis of resistant TB as well as to determine the prevalence of specific drug resistance mutatio…	eng	International journal of antimicrobial agents	Int J Antimicrob Agents	9111860	2014	Dec		44	6	546-51	Internet	Carla Silva	Silva, C; Perdigão, J; Jordão, L; Portugal, I	Centro de Patogénese Molecular/URIA, Faculdade de Farmácia da Universidade de Lisboa, Av. Prof. Gama Pinto, 1649-003 Lisbon, Portugal.	journal
hospital	1	Strain data not reported	China	0			Strain data insufficient or unavailable	0	0	0	LPW				PubMed		25302501	10.1371/journal.pone.0110209	Molecular epidemiology and clinical characteristics of drug-resistant Mycobacterium tuberculosis in a tuberculosis referral hospital in China	Despite the large number of drug-resistant tuberculosis (TB) cases in China, few studies have comprehensively analyzed the drug resistance-associated gene mutations and genotypes in relation to the clinical characteristics of M. tuberculosis (Mtb) isolates.We thus analyzed the phenotypic and genotypic drug resistance profiles of 115 Mtb clinical isolates recovered from a tuberculosis referral hos…	eng	PloS one	PLoS One	101285081	2014			9	10	e110209	Internet	Qi Wang	Wang, Q; Lau, SK; Liu, F; Zhao, Y; Li, HM; Li, BX; Hu, YL; Woo, PC; Liu, CH	CAS Key Laboratory of Pathogenic Microbiology and Immunology, Institute of Microbiology, Chinese Academy of Sciences, Beijing, China.	journal
	1	MDRTB only	China	0			Drug resistant strains only	0	0	0	LPW				PubMed		25312982	10.1016/j.ijid.2014.05.020	Genetic diversity of multidrug-resistant tuberculosis in a resource-limited region of China	To gain an insight into the genetic diversity of multidrug-resistant (MDR) Mycobacterium tuberculosis isolates in Chongqing Municipality, an MDR tuberculosis (MDR-TB) epidemic region of China.In this study, a total of 208M. tuberculosis isolates from smear-positive TB patients in Chongqing were genotyped by spoligotyping and mycobacterial interspersed repetitive unit-variable number tandem repeat…	eng	International journal of infectious diseases : IJID : official publication of the International Society for Infectious Diseases	Int J Infect Dis	9610933	2014	Dec		29		2017-07-11	Internet	Dan Zhang	Zhang, D; An, J; Wang, Y; Pang, Y	Yongchuan Hospital, Chongqing Medical University, Chongqing, China; National Center for Tuberculosis Control and Prevention, Chinese Center for Disease Control and Prevention, No. 155, Changbai Road, Changping District, Beijing, 102206, China.	journal
	1	convenience sample, hospital	Brazil	0			Convenience sample	0	0	0	KEW				PubMed		25314118	10.1371/journal.pone.0107747	Strain classification of Mycobacterium tuberculosis isolates in Brazil based on genotypes obtained by spoligotyping, mycobacterial interspersed repetitive unit typing and the presence of large sequence and single nucleotide polymorphism	Rio de Janeiro is endemic for tuberculosis (TB) and presents the second largest prevalence of the disease in Brazil. Here, we present the bacterial population structure of 218 isolates of Mycobacterium tuberculosis, derived from 186 patients that were diagnosed between January 2008 and December 2009. Genotypes were generated by means of spoligotyping, 24 MIRU-VNTR typing and presence of fbpC103, …	eng	PloS one	PLoS One	101285081	2014			9	10	e107747	Internet	Sidra E G Vasconcellos	Vasconcellos, SE; Acosta, CC; Gomes, LL; Conceição, EC; Lima, KV; de Araujo, MI; Leite, Mde L; Tannure, F; Caldas, PC; Gomes, HM; Santos, AR; Gomgnimbou, MK; Sola, C; Couvin, D; Rastogi, N; Boechat, N; Suffys, PN	Laboratory of Molecular Biology Applied to Mycobacteria, Oswaldo Cruz Institute, FIOCRUZ, Rio de Janeiro, Rio de Janeiro, Brazil; Multidisciplinary Research Laboratory, University Hospital Clementino Fraga Filho - HUCFF, Federal University of Rio de Janeiro, Rio de Janeiro, Rio de Janeiro, Brazil.	journal
	1	cluster analysis	Mexico	0			Clusters only	0	0	0	KEW				PubMed		25317710		Correlations between major risk factors and closely related Mycobacterium tuberculosis isolates grouped by three current genotyping procedures: a population-based study in northeast Mexico	The characteristics of tuberculosis (TB) patients related to a chain of recent TB transmissions were investigated. Mycobacterium tuberculosis (MTB) isolates (120) were genotyped using the restriction fragment length polymorphism-IS6110 (R), spacer oligotyping (S) and mycobacterial interspersed repetitive units-variable number of tandem repeats (M) methods. The MTB isolates were clustered and the …	eng	Memorias do Instituto Oswaldo Cruz	Mem Inst Oswaldo Cruz	7502619	2014	Sep		109	6	814-9	Internet	Katia Peñuelas-Urquides	Peñuelas-Urquides, K; Martínez-Rodríguez, HG; Enciso-Moreno, JA; Molina-Salinas, GM; Silva-Ramírez, B; Padilla-Rivas, GR; Vera-Cabrera, L; Torres-de-la-Cruz, VM; Martínez-Martínez, YB; Ortega-García, JL; Garza-Treviño, EN; Enciso-Moreno, L; Saucedo-Cárdenas, O; Becerril-Montes, P; Said-Fernández, S	División de Biología Celular y Molecular, Centro de Investigación Biomédica del Noreste, Zacatecas, ZC, México.	journal
hospital	1	insufficient strain data	Brazil	0			Strain data insufficient or unavailable	0	0	0	KEW				PubMed		25338623	10.1186/s12879-014-0548-6	Tuberculosis recurrence in a high incidence setting for HIV and tuberculosis in Brazil	To compare epidemiological data between recurrent cases after cure (RC), distinguishing relapse from reinfection, after dropout (RD) and new cases (NC) in an ambulatory setting in a TB-endemic country.Records of patients who started treatment for pulmonary TB between 2004 and 2010 in a TB clinic were reviewed. Epidemiological data were analyzed. Spoligotyping and MIRU patterns were used to determ…	eng	BMC infectious diseases	BMC Infect Dis	100968551	2014	Oct		14		548	Internet	Gisela Unis	Unis, G; Ribeiro, AW; Esteves, LS; Spies, FS; Picon, PD; Dalla Costa, ER; Rossetti, ML		journal
hospital, unclear	1	insufficient strain data	0	0			Strain data insufficient or unavailable	0	0	0	KEW				PubMed		25378811	10.1155/2014/513263	Elevated OPN, IP-10, and neutrophilia in loop-mediated isothermal amplification confirmed tuberculosis patients	Tuberculosis (TB) is the second most common cause of death from infectious diseases and results in high socioeconomic losses to many countries. Proper diagnosis is the first step in TB eradication. To develop a rapid, simple, and accurate diagnostic TB test and to characterize the prevalence of Mycobacterium tuberculosis (MTB) genotypes and immune profiles of TB patients, a total of 37?TB patient…	eng	Mediators of inflammation	Mediators Inflamm	9209001	2014			2014		513263	Internet	Beata Shiratori	Shiratori, B; Leano, S; Nakajima, C; Chagan-Yasutan, H; Niki, T; Ashino, Y; Suzuki, Y; Telan, E; Hattori, T	Division of Disaster-Related Infectious Diseases, International Research Institute of Disaster Science, Tohoku University, 1-1 Seiryo-machi, Aoba-ku, Sendai, Miyagi 980-8574, Japan ; Division of Emerging Infectious Diseases, Graduate School of Medicine, Tohoku University, 1-1 Seiryo-machi, Aoba-ku, Sendai, Miyagi 980-8574, Japan ; Japan International Corporation of Welfare Services, 2-3-20 Torano…	journal
this study contains old and new samples (only record new samples)	1	unsure about sampling -- from two diferent sets	Italy	0			Unclear sampling method	0	0	0	LPW				PubMed		25407589	10.1186/s12879-014-0602-4	Molecular epidemiology of tuberculosis in Sicily, Italy: what has changed after a decade?	We aimed to investigate the molecular epidemiology of Mycobacterium tuberculosis complex (MTBC) isolates in the province of Palermo, Sicily, Italy, by characterizing 183 isolates identified in the years 2004-2012. A comparison with 104 MTBC strains identified in the same geographic area in the years 1994-2000 was also carried out.One hundred eighty-three MTBC isolates identified in Palermo, Italy…	eng	BMC infectious diseases	BMC Infect Dis	100968551	2014	Nov		14		602	Internet	Celestino Bonura	Bonura, C; Gomgnimbou, MK; Refrégier, G; Aleo, A; Fasciana, T; Giammanco, A; Sola, C; Mammina, C	Department of Sciences for Health Promotion and Mother-Child Care ""G. D'Alessandro"", University of Palermo, Palermo, Italy. celestino.bonura@unipa.it.	journal
	1	English article unavailable	China	0			Not English	0	0	0	LPW				PubMed		25484012	10.3967/bes2014.136	Molecular characterization and drug-resistance of Mycobacterium tuberculosis strains in Xuzhou, China	To understand the genetic diversity and drug resistance status of Mycobacterium tuberculosis (M. tuberculosis) circulating in Xuzhou of China, the spacer-oligonucleotide typing (Spoligotyping) and multi-loci VNTRs (variable number tandem repeats) analysis (MLVA) were utilized for the genotyping of the isolates. Drug susceptibility test (DST) was performed by the proportion method on the Lowenstei…	eng	Biomedical and environmental sciences : BES	Biomed Environ Sci	8909524	2014	Dec		27	12	960-4	Print	Hui Pang	Pang, H; Tong, J; Liu, HC; Du, YG; Zhao, XQ; Yi, J; Wu, XC; Yang, JC; Wan, KL	Department of Immunology, Changzhi Medical College, Changzhi 046000, Shanxi, China; State Key Laboratory for Infectious Disease Prevention and Control, National Institute for Communicable Disease Control and Prevention, Chinese Center for Disease Control and Prevention, Beijing 102206, China; Department of Immunology, Xiangya School of Medicine, Central south University, Changsha 410078, Hunan, C…	journal
	1	Non random sampling	West Africa	0			Biased sampling	0	0	0	LPW				PubMed		25493429	10.1371/journal.pone.0110393	Shifts in Mycobacterial Populations and Emerging Drug-Resistance in West and Central Africa	In this study, we retrospectively analysed a total of 605 clinical isolates from six West or Central African countries (Benin, Cameroon, Central African Republic, Guinea-Conakry, Niger and Senegal). Besides spoligotyping to assign isolates to ancient and modern mycobacterial lineages, we conducted phenotypic drug-susceptibility-testing for each isolate for the four first-line drugs. We showed tha…	eng	PloS one	PLoS One	101285081	2014			9	12	e110393	Internet	Florian Gehre	Gehre, F; Ejo, M; Fissette, K; de Rijk, P; Uwizeye, C; Nduwamahoro, E; Goovaerts, O; Affolabi, D; Gninafon, M; Lingoupou, FM; Barry, MD; Sow, O; Merle, C; Olliaro, P; Ba, F; Sarr, M; Piubello, A; Noeske, J; Antonio, M; Rigouts, L; de Jong, BC	Institute of Tropical Medicine (ITM), Antwerp, Belgium; Medical Research Council (MRC), The Gambia Unit, Fajara, The Gambia.	journal
hospital, rflp	1	insufficient strain data	Iran	0			Strain data insufficient or unavailable	0	0	0	KEW				PubMed		25505987	10.1155/2014/195287	Extensive Genetic Diversity among Clinical Isolates of Mycobacterium tuberculosis in Central Province of Iran	Human tuberculosis caused by Mycobacterium tuberculosis (Mtb) remains a significant disease in many countries. According to Iran's borders with Afghanistan and Pakistan, which are among the 22 high burden countries around the world, this study was conducted to analyze the current molecular epidemiology of tuberculosis and survey genetic diversity of Mtb strains in Markazi Province in center of Ir…	eng	Tuberculosis research and treatment	Tuberc Res Treat	101576351	2014			2014		195287	Print	Saman Soleimanpour	Soleimanpour, S; Hamedi Asl, D; Tadayon, K; Farazi, AA; Keshavarz, R; Soleymani, K; Seddighinia, FS; Mosavari, N	PPD Tuberculin Department, Razi Vaccine & Serum Research Institute, Karaj 3197619751, Iran ; Antimicrobial Resistance Research Center, Mashhad University of Medical Sciences, Mashhad, Iran.	journal
	1	convenience sampling	Venezuela	0			Convenience sample	0	0	0	LPW				PubMed		25558753		Mycobacterium tuberculosis population structure and molecular epidemiological analysis in Sucre municipality, Miranda state, Venezuela	Sucre municipality is a large, densely populated marginal area in the eastern part of Caracas, Venezuela that consistently has more cases of tuberculosis than other municipalities in the country. To identify the neighborhoods in the municipality with the highest prevalence of tuberculosis, and determine whether the Mycobacterium tuberculosis strain distribution in this municipality is different f…	eng	Investigacion clinica	Invest Clin	421531	2014	Dec		55	4	332-51	Print	Margareth A Patiño	Patiño, MA; Abadía, E; Solalba Gómez, ; Maes, M; Muñoz, M; Gómez, D; Guzmán, P; Méndez, MV; Ramirez, C; Mercedes, E; de Waard, J; Takiff, H	Instituto Venezolano de Investigaciones Cientícas España, Altos de Pipe, Venezuela.	journal
	1	strain data not reported	Mozambique	0			Strain data insufficient or unavailable	0	0	0	LPW				PubMed		26786330	10.1016/j.ijmyco.2014.03.004	Genetic diversity of Mycobacterium tuberculosis isolates obtained from patients with pulmonary tuberculosis in Beira city, Mozambique	Tuberculosis (TB) represents a serious public health problem in Mozambique, with an estimated incidence rate of 548 cases per 100,000 population in 2011. Information on the molecular epidemiology of Mycobacterium tuberculosis (MTB) strains circulating in Mozambique is limited. This study provides the first description of the genetic diversity of MTB strains circulating in Beira city, the second l…	eng	International journal of mycobacteriology	Int J Mycobacteriol	101615660	2014	Jun		3	2	94-100	Internet	Abuchahama Saifodine	Saifodine, A; Fyfe, J; Sievers, A; Coelho, E; Azam, K; Black, J	Faculdade de Medicina, Universidade Eduardo Mondlane, Mozambique. Electronic address: asaifodine@gmail.com.	journal
[truncated: 3,529 more rows]
